# Supplementary material for: Long genes linked to autism spectrum disorders harbor broad enhancer-like chromatin domains
Source: HighWire-hosted journal article supplement (doi:10.1101/gr.233775.117), 2018-05-30
Supplement: Supplemental_Fig_S3.pdf [file Supplemental_Fig_S3.pdf]

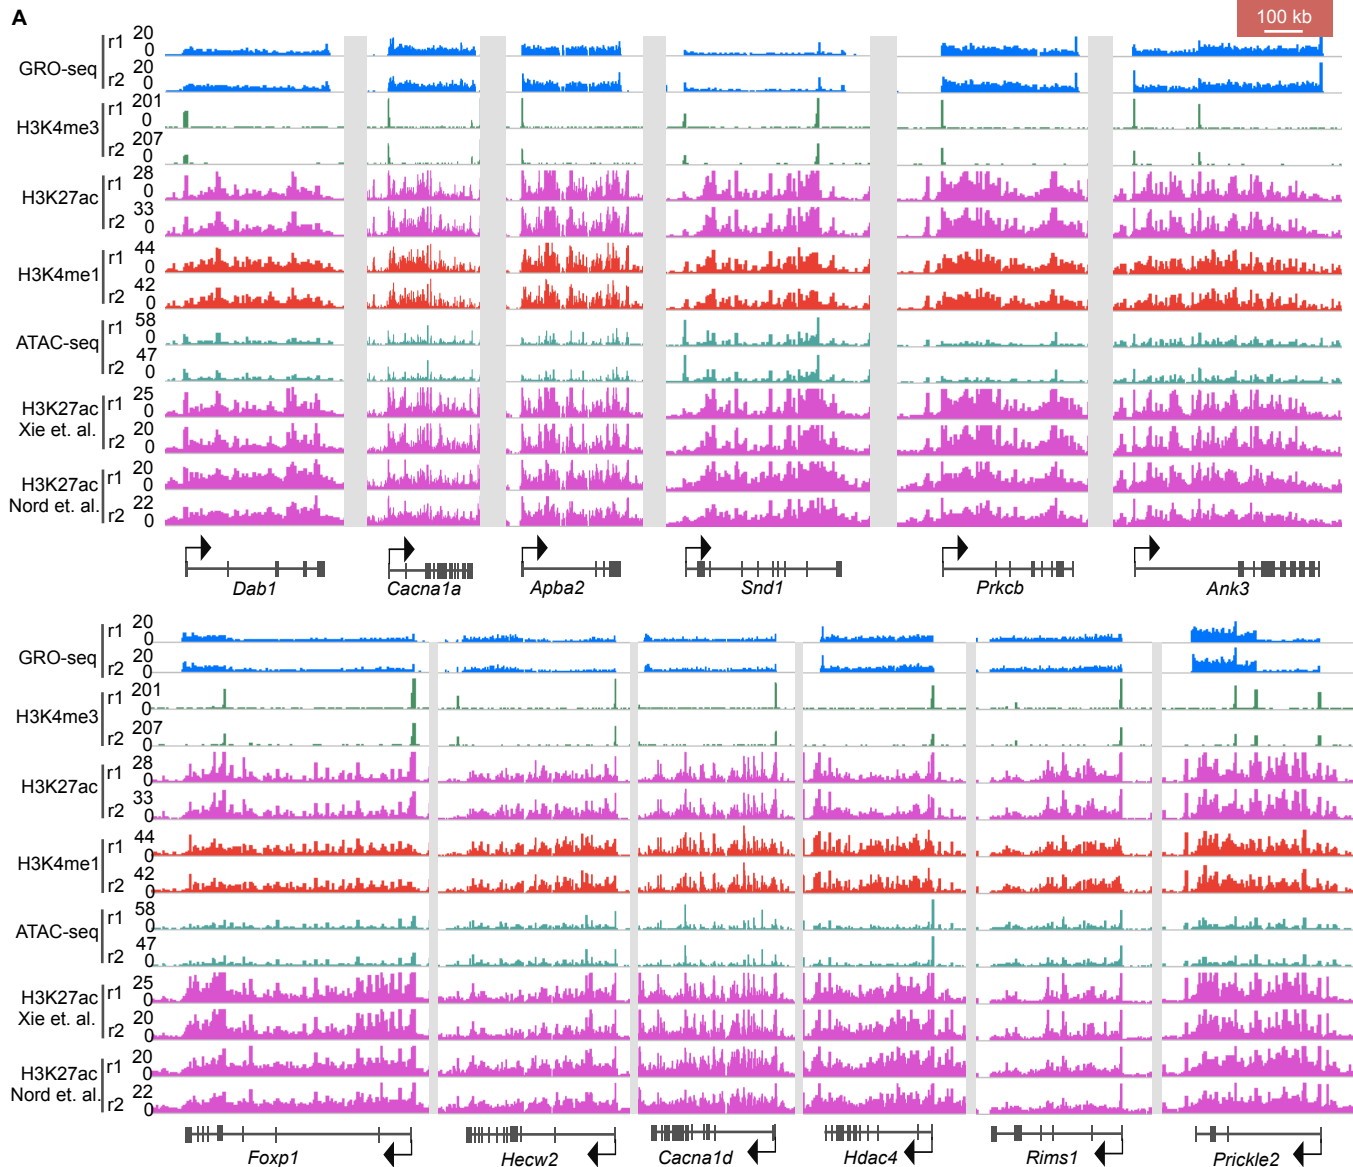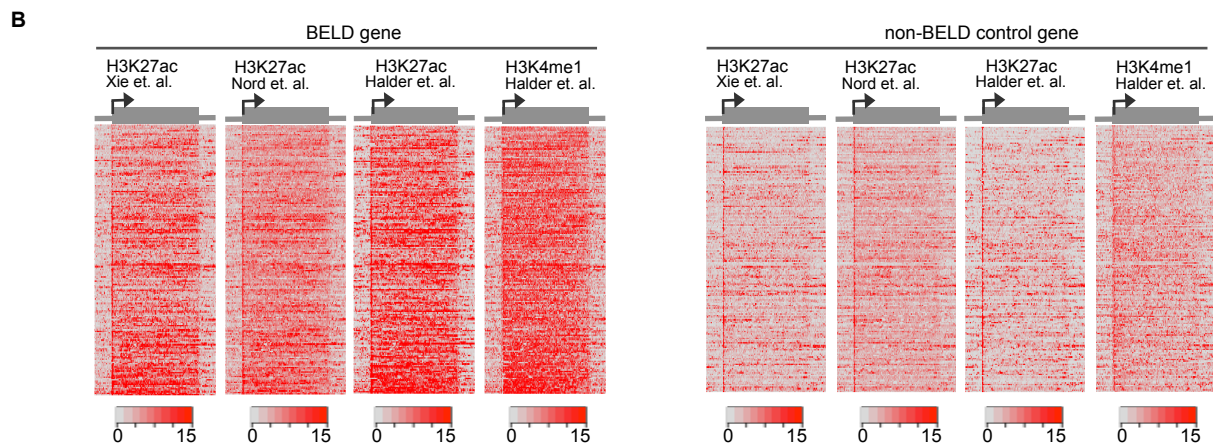

**Supplemental Figure S3. Broad enhancer-like chromatin domains across the gene bodies of the BELD genes were confirmed by independent datasets.** (A) Browser representations of GRO-seq, ChIP-seq, and ATAC-seq signals at twelve BELD genes. (B) Heatmaps of previous published H3K27ac and H3K4me1 normalized signals (RP30M) across the gene bodies and surrounding regions ( $\pm 100$ kb) of BELD genes and non-BELD control genes.
