# Supplementary material for: Long genes linked to autism spectrum disorders harbor broad enhancer-like chromatin domains
Source: HighWire-hosted journal article supplement (doi:10.1101/gr.233775.117), 2018-05-30
Supplement: Supplemental_Table_S1.xlsx [file Supplemental_Table_S1.xlsx]

## Sheet: Supplemental_Table_S1
Supplemental Table S1. List of BELD genes in the mouse cortex.
Ensembl ID	Gene Symbol	Chromosome loci	Strand	Category	SFARI genes	CPM of H3K27ac rep1	CPM of H3K27ac rep2	CPM of H3K4me1 rep1	CPM of H3K4me1 rep2	RPKM of H3K27ac rep1	RPKM of H3K27ac rep2	RPKM of H3K4me1 rep1	RPKM of H3K4me1 rep2	Pausing index	Gene length
ENSMUSG00000039852	Rere	chr4:150281646-150621966	+	BELD gene	Yes	549.483	590.159	659.884	651.933	1.615	1.734	1.939	1.916	1.62095	340321
ENSMUSG00000026764	Kif5c	chr2:49619298-49774778	+	BELD gene	Yes	368.623	407.771	411.628	383.417	2.371	2.623	2.647	2.466	19.0913	155481
ENSMUSG00000032076	Cadm1	chr9:47530173-47857637	+	BELD gene	Yes	627.234	618.145	612.924	621.179	1.915	1.888	1.872	1.897	6.29795	327465
ENSMUSG00000038331	Satb2	chr1:56793986-56978650	-	BELD gene	Yes	794.215	714.123	434.214	412.207	4.301	3.867	2.351	2.232	0.648669	184665
ENSMUSG00000032017	Grik4	chr9:42518135-42944493	-	BELD gene	Yes	571.21	600.086	615.465	572.954	1.34	1.407	1.444	1.344	1.56026	426359
ENSMUSG00000030302	Atp2b2	chr6:113745669-114042613	-	BELD gene	Yes	1338.39	1332.87	1100.5	984.334	4.507	4.489	3.706	3.315	0.0442177	296945
ENSMUSG00000059003	Grin2a	chr16:9577710-9994921	-	BELD gene	Yes	1246.69	1298.96	1080.03	1003.46	2.988	3.113	2.589	2.405	3.50394	417212
ENSMUSG00000027030	Stk39	chr2:68210445-68472268	-	BELD gene	Yes	426.173	403.167	367.068	363.879	1.628	1.54	1.402	1.39	1.75635	261824
ENSMUSG00000050272	Dscam	chr16:96592079-97170752	-	BELD gene	Yes	755.849	810.4	841.889	814.645	1.306	1.4	1.455	1.408	0.831906	578674
ENSMUSG00000026527	Rgs7	chr1:175059736-175491130	-	BELD gene	Yes	684.347	780.142	627.652	603.14	1.586	1.808	1.455	1.398	0.858056	431395
ENSMUSG00000058589	Anks1b	chr10:89873509-90973300	+	BELD gene	Yes	2121.2	1941.68	1476.13	1463.89	1.929	1.766	1.342	1.331	10.056	1099792
ENSMUSG00000022892	App	chr16:84954440-85173707	-	BELD gene	Yes	423.048	436.475	496.795	452.678	1.929	1.991	2.266	2.064	7.42742	219268
ENSMUSG00000029765	Plxna4	chr6:32145926-32588192	-	BELD gene	Yes	557.985	604.511	769.143	717.007	1.262	1.367	1.739	1.621	2.22675	442267
ENSMUSG00000001424	Snd1	chr6:28475139-28935162	+	BELD gene	Yes	968.681	999.485	807.822	789.369	2.106	2.173	1.756	1.716	0	460024
ENSMUSG00000022263	Trio	chr15:27730652-28025848	-	BELD gene	Yes	888.169	925.095	818.973	755.721	3.009	3.134	2.774	2.56	3.27602	295197
ENSMUSG00000038473	Nos1ap	chr1:170302668-170589861	-	BELD gene	Yes	748.582	766.149	561.871	561.221	2.607	2.668	1.956	1.954	1.7527	287194
ENSMUSG00000030519	Apba2	chr7:64501706-64753870	+	BELD gene	Yes	874.654	820.865	683.223	629.345	3.469	3.255	2.709	2.496	6.09303	252165
ENSMUSG00000049044	Rapgef4	chr2:71981240-72257474	+	BELD gene	Yes	398.633	412.256	428.144	417.324	1.443	1.492	1.55	1.511	2.93315	276235
ENSMUSG00000042807	Hecw2	chr1:53806882-54195168	-	BELD gene	Yes	540.691	625.261	645.439	615.131	1.393	1.61	1.662	1.584	2.1886	388287
ENSMUSG00000069601	Ank3	chr10:69533772-70027438	+	BELD gene	Yes	1235.87	1214.52	1045.4	1002.94	2.503	2.46	2.118	2.032	6.3681	493667
ENSMUSG00000003279	Dlgap1	chr17:69969073-70821413	+	BELD gene	Yes	1582.04	1551.07	1207.92	1204.88	1.856	1.82	1.417	1.414	0.272529	852341
ENSMUSG00000061731	Ext1	chr15:53064038-53346159	-	BELD gene	Yes	561.691	600.803	535.474	501.212	1.991	2.13	1.898	1.777	5.2701	282122
ENSMUSG00000061911	Myt1l	chr12:29528384-29923209	+	BELD gene	Yes	1364.12	1355.23	924.609	892.692	3.455	3.432	2.342	2.261	3.34482	394826
ENSMUSG00000028176	Lrrc7	chr3:158084439-158562221	-	BELD gene	Yes	657.825	662.217	667.225	648.211	1.377	1.386	1.397	1.357	5.37077	477783
ENSMUSG00000028519	Dab1	chr4:103619359-104744844	+	BELD gene	Yes	1566.7	1671.63	1640.68	1610.42	1.392	1.485	1.458	1.431	1.15684	1125486
ENSMUSG00000032826	Ank2	chr3:126921606-127499259	-	BELD gene	Yes	1038.73	964.264	990.485	911.558	1.798	1.669	1.715	1.578	0.521396	577654
ENSMUSG00000037996	Slc24a2	chr4:86983124-87230477	-	BELD gene	Yes	697.717	687.811	450.212	454.022	2.821	2.781	1.82	1.836	1.64624	247354
ENSMUSG00000066687	Zbtb16	chr9:48654311-48835945	-	BELD gene	Yes	644.673	639.494	444.048	413.344	3.549	3.521	2.445	2.276	4.34356	181635
ENSMUSG00000056258	Kcnq3	chr15:65986387-66286224	-	BELD gene	Yes	573.317	600.624	543.755	525.867	1.912	2.003	1.813	1.754	1.62623	299838
ENSMUSG00000020598	Nrcam	chr12:44328885-44601846	+	BELD gene	Yes	503.996	531.257	479.621	481.83	1.846	1.946	1.757	1.765	11.9095	272962
ENSMUSG00000030067	Foxp1	chr6:98925338-99522721	-	BELD gene	Yes	925.664	944.35	885.743	850.516	1.55	1.581	1.483	1.424	1.45755	597384
ENSMUSG00000052889	Prkcb	chr7:122288751-122634402	+	BELD gene	Yes	1124.69	1074.41	824.761	779.445	3.254	3.108	2.386	2.255	0.565015	345652
ENSMUSG00000069729	Arid1b	chr17:4994332-5347656	+	BELD gene	Yes	703.676	766.507	858.263	808.959	1.992	2.169	2.429	2.29	1.18691	353325
ENSMUSG00000030020	Prickle2	chr6:92370892-92706145	-	BELD gene	Yes	1049.77	1041.46	818.315	790.403	3.131	3.106	2.441	2.358	2.46193	335254
ENSMUSG00000036800	Fam135b	chr15:71445678-71727838	-	BELD gene	Yes	393.91	402.748	395.582	381.556	1.396	1.427	1.402	1.352	9.63404	282161
ENSMUSG00000063142	Kcnma1	chr14:23289431-23803304	-	BELD gene	Yes	1058.86	1127.28	1003.99	959.783	2.061	2.194	1.954	1.868	0.726025	513874
ENSMUSG00000015222	Map2	chr1:66175273-66442583	+	BELD gene	Yes	438.671	384.33	398.405	406.366	1.641	1.438	1.49	1.52	10.112	267311
ENSMUSG00000059146	Ntrk3	chr7:78192362-78578408	-	BELD gene	Yes	504.941	524.141	627.511	586.29	1.308	1.358	1.625	1.519	11.1654	386047
ENSMUSG00000015968	Cacna1d	chr14:30039949-30491156	-	BELD gene	Yes	625.708	631.122	600.361	582.568	1.387	1.399	1.331	1.291	0	451208
ENSMUSG00000034656	Cacna1a	chr8:84388440-84640246	+	BELD gene	Yes	517.802	593.508	481.126	431.9	2.056	2.357	1.911	1.715	0.0481059	251807
ENSMUSG00000037541	Shank2	chr7:144001928-144424494	+	BELD gene	Yes	926.318	951.766	918.916	859.871	2.192	2.252	2.175	2.035	0	422567
ENSMUSG00000008658	Rbfox1	chr16:6809222-7412479	+	BELD gene	Yes	971.079	994.223	1086.29	1043	1.61	1.648	1.801	1.729	1.37975	603258
ENSMUSG00000056427	Slit3	chr11:35121224-35708507	+	BELD gene	Yes	942.304	1022.03	911.717	868.761	1.605	1.74	1.552	1.479	1.19955	587284
ENSMUSG00000024109	Nrxn1	chr17:90033644-91092805	-	BELD gene	Yes	1597.88	1617.81	1497.77	1501	1.509	1.527	1.414	1.417	8.95665	1059162
ENSMUSG00000005583	Mef2c	chr13:83504034-83667079	+	BELD gene	Yes	702.949	605.348	478.256	464.566	4.311	3.713	2.933	2.849	0.0234448	163046
ENSMUSG00000030209	Grin2b	chr6:135713232-136173511	-	BELD gene	Yes	1495.28	1401.34	1179.55	1111.43	3.249	3.045	2.563	2.415	0.448722	460280
ENSMUSG00000024268	Celf4	chr18:25477632-25753983	-	BELD gene	Yes	873.927	904.524	849.276	793.815	3.162	3.273	3.073	2.872	4.57207	276352
ENSMUSG00000047495	Dlgap2	chr8:14095865-14847680	+	BELD gene	Yes	1071.21	1116.63	1513.11	1394.27	1.425	1.485	2.013	1.855	7.49987	751816
ENSMUSG00000034390	Cmip	chr8:117257019-117461503	+	BELD gene	Yes	577.386	603.016	553.448	502.194	2.824	2.949	2.707	2.456	1.00724	204485
ENSMUSG00000053477	Tcf4	chr18:69344146-69687967	+	BELD gene	Yes	1357.5	1199.04	806.551	791.644	3.948	3.487	2.346	2.302	0.225426	343822
ENSMUSG00000060924	Csmd1	chr8:15892537-17535586	-	BELD gene	Yes	2474.27	2643.25	2353.5	2277.6	1.506	1.609	1.432	1.386	2.98255	1643050
ENSMUSG00000033530	Ttc7b	chr12:100300771-100520822	-	BELD gene	No	1243.13	1225.71	618.006	593.112	5.649	5.57	2.808	2.695	3.75405	220052
ENSMUSG00000021313	Ryr2	chr13:11553103-12106945	-	BELD gene	No	938.743	970.782	896.518	860.44	1.695	1.753	1.619	1.554	1.47838	553843
ENSMUSG00000033510	Otud7a	chr7:63444751-63759028	+	BELD gene	No	474.858	484.135	495.995	461.361	1.511	1.54	1.578	1.468	7.90802	314278
ENSMUSG00000031626	Sorbs2	chr8:45507788-45827906	+	BELD gene	No	580.148	599.488	578.481	548.351	1.812	1.873	1.807	1.713	3.96259	320119
ENSMUSG00000045038	Prkce	chr17:86167785-86657919	+	BELD gene	No	913.965	953.021	921.222	900.807	1.865	1.944	1.88	1.838	2.73138	490135
ENSMUSG00000051401	Kctd16	chr18:40258361-40531168	+	BELD gene	No	477.764	465.777	527.333	503.9	1.751	1.707	1.933	1.847	3.11349	272808
ENSMUSG00000040111	Gramd1b	chr9:40293233-40531383	-	BELD gene	No	561.182	544.054	453.506	426.989	2.356	2.284	1.904	1.793	0.923923	238151
ENSMUSG00000008575	Nfib	chr4:82290173-82705750	-	BELD gene	No	672.794	638.477	542.908	554.45	1.619	1.536	1.306	1.334	0.253113	415578
ENSMUSG00000051359	Ncald	chr15:37366175-37792570	-	BELD gene	No	854.017	839.403	668.024	655.551	2.003	1.969	1.567	1.537	1.42294	426396
ENSMUSG00000028649	Macf1	chr4:123349633-123684360	-	BELD gene	No	460.18	521.629	488.467	487.67	1.375	1.558	1.459	1.457	0.984163	334728
ENSMUSG00000022265	Ank	chr15:27466677-27594909	+	BELD gene	No	515.186	515.888	455.388	423.681	4.018	4.023	3.551	3.304	1.78472	128233
ENSMUSG00000053580	Tanc2	chr11:105589986-105929304	+	BELD gene	No	509.373	500.699	491.337	482.088	1.501	1.476	1.448	1.421	0.552088	339319
ENSMUSG00000026442	Nfasc	chr1:132564691-132741797	-	BELD gene	No	375.817	415.725	412.333	389.051	2.122	2.347	2.328	2.197	5.43769	177107
ENSMUSG00000057716	Tmem178b	chr6:39873271-40255150	+	BELD gene	No	748.146	758.853	862.498	822.294	1.959	1.987	2.259	2.153	0.836646	381880
ENSMUSG00000032087	Dscaml1	chr9:45430293-45753164	+	BELD gene	No	580.002	596.857	491.76	485.086	1.796	1.849	1.523	1.502	3.73584	322872
ENSMUSG00000015501	Hivep2	chr10:13966379-14151376	+	BELD gene	No	706.873	527.49	525.122	503.487	3.821	2.851	2.839	2.722	1.88998	184998
ENSMUSG00000068373	D430041D05Rik	chr2:104143073-104410334	-	BELD gene	No	820.447	817.875	646.286	588.512	3.07	3.06	2.418	2.202	4.20094	267262
ENSMUSG00000034295	Fhod3	chr18:24709445-25133500	+	BELD gene	No	713.122	775.417	683.129	642.319	1.682	1.829	1.611	1.515	0.882399	424056
ENSMUSG00000035934	Pknox2	chr9:36890982-37147314	-	BELD gene	No	972.314	969.586	607.137	564.839	3.793	3.783	2.369	2.204	2.93117	256333
ENSMUSG00000054640	Slc8a1	chr17:81388691-81649607	-	BELD gene	No	457.273	452.86	383.301	389.309	1.753	1.736	1.469	1.492	1.26869	260917
ENSMUSG00000056222	Spock1	chr13:57429295-57907587	-	BELD gene	No	825.896	929.46	910.729	875.015	1.727	1.943	1.904	1.829	1.47795	478293
ENSMUSG00000053025	Sv2b	chr7:75114897-75309262	-	BELD gene	No	722.351	661.978	461.317	443.736	3.716	3.406	2.373	2.283	3.51189	194366
ENSMUSG00000028351	Brinp1	chr4:68761514-68954397	-	BELD gene	No	408.588	404.542	467.151	447.251	2.118	2.097	2.422	2.319	8.11911	192884
ENSMUSG00000026883	Dab2ip	chr2:35558266-35730994	+	BELD gene	No	368.769	426.429	443.295	391.325	2.135	2.469	2.566	2.266	0.659002	172729
ENSMUSG00000044912	Syt16	chr12:73997761-74267916	+	BELD gene	No	457.927	461.292	422.968	414.171	1.695	1.708	1.566	1.533	6.09759	270156
ENSMUSG00000021536	Adcy2	chr13:68620043-68999541	-	BELD gene	No	636.607	738.581	535.332	538.117	1.677	1.946	1.411	1.418	0.890045	379499
ENSMUSG00000025576	Rbfox3	chr11:118489762-118911597	-	BELD gene	No	1724.75	1860.06	1536.92	1371.52	4.089	4.409	3.643	3.251	0	421836
ENSMUSG00000027777	Schip1	chr3:68064802-68626481	+	BELD gene	No	856.633	778.108	743.781	743.936	1.525	1.385	1.324	1.324	0.951719	561680
ENSMUSG00000052512	Nav2	chr7:48908716-49610090	+	BELD gene	No	1521.14	1499.59	1448.46	1368.94	2.169	2.138	2.065	1.952	0.0814856	701375
ENSMUSG00000030102	Itpr1	chr6:108213118-108551109	+	BELD gene	No	1003.56	944.769	665.342	640.406	2.969	2.795	1.969	1.895	5.62104	337992
ENSMUSG00000048915	Efna5	chr17:62604184-62881317	-	BELD gene	No	403.575	403.884	394.5	376.853	1.456	1.457	1.423	1.36	1.38667	277134
ENSMUSG00000044252	Osbpl1a	chr18:12755314-12941841	-	BELD gene	No	560.31	538.373	383.066	390.86	3.004	2.886	2.054	2.095	1.00934	186528
ENSMUSG00000004110	Cacna1e	chr1:154392519-154725920	-	BELD gene	No	608.922	626.697	636.357	595.8	1.826	1.88	1.909	1.787	2.25297	333402
ENSMUSG00000033066	Gas7	chr11:67455437-67688990	+	BELD gene	No	890.422	854.592	633.722	605.776	3.812	3.659	2.713	2.594	0.717122	233554
ENSMUSG00000054423	Cadps	chr14:12372563-12823079	-	BELD gene	No	714.721	705.99	702.891	700.674	1.586	1.567	1.56	1.555	10.0832	450517
ENSMUSG00000062202	Btbd9	chr17:30215524-30576287	-	BELD gene	No	694.52	599.727	669.342	625.314	1.925	1.662	1.855	1.733	13.3967	360764
ENSMUSG00000058153	Sez6l	chr5:112419151-112577198	-	BELD gene	No	523.688	535.263	426.826	402.8	3.313	3.387	2.701	2.549	9.80003	158048
ENSMUSG00000021684	Pde8b	chr13:95024454-95250336	-	BELD gene	No	418.616	460.754	439.484	398.613	1.853	2.04	1.946	1.765	0.800095	225883
ENSMUSG00000030657	Xylt1	chr7:117380979-117667751	+	BELD gene	No	439.761	468.049	534.862	525.609	1.533	1.632	1.865	1.833	1.71066	286773
ENSMUSG00000027419	Pcsk2	chr2:143546156-143816285	+	BELD gene	No	596.57	654.324	550.154	515.323	2.208	2.422	2.037	1.908	3.31354	270130
ENSMUSG00000039145	Camk1d	chr2:5293457-5714515	-	BELD gene	No	760.281	801.61	742.228	716.955	1.806	1.904	1.763	1.703	1.72616	421059
ENSMUSG00000042757	Tmem108	chr9:103482936-103761837	-	BELD gene	No	476.456	519.297	497.689	466.53	1.708	1.862	1.784	1.673	6.54201	278902
ENSMUSG00000039809	Gabbr2	chr4:46662318-46991873	-	BELD gene	No	1224.6	1288.5	981.262	900.601	3.716	3.91	2.978	2.733	0.842244	329556
ENSMUSG00000038244	Mical2	chr7:112225856-112355194	+	BELD gene	No	519.619	442.395	442.024	412.155	4.017	3.42	3.418	3.187	3.14792	129339
ENSMUSG00000020627	Klhl29	chr12:5077472-5375682	-	BELD gene	No	1033.64	1060.84	836.383	777.378	3.466	3.557	2.805	2.607	2.94169	298211
ENSMUSG00000049939	Lrrc4	chr6:28661831-28831747	-	BELD gene	No	500.217	505.244	392.1	373.441	2.944	2.973	2.308	2.198	8.3207	169917
ENSMUSG00000029705	Cux1	chr5:136248135-136567490	-	BELD gene	No	565.542	621.135	521.781	490.358	1.771	1.945	1.634	1.535	6.58129	319356
ENSMUSG00000061751	Kalrn	chr16:33974258-34573532	-	BELD gene	No	2102.09	2123.23	1719.4	1643.09	3.508	3.543	2.869	2.742	0.401712	599275
ENSMUSG00000054728	Phactr1	chr13:42680623-43138526	+	BELD gene	No	1157.68	1091.64	1192.82	1100.11	2.528	2.384	2.605	2.402	1.85947	457904
ENSMUSG00000023026	Dip2b	chr15:100038664-100219473	+	BELD gene	No	462.868	491.909	435.108	409.777	2.56	2.721	2.406	2.266	18.44	180810
ENSMUSG00000059974	Ntm	chr9:28994750-29963141	-	BELD gene	No	1495.86	1609.5	1601.53	1565.46	1.545	1.662	1.654	1.617	12.9663	968392
ENSMUSG00000020181	Nav3	chr10:109682660-110000219	-	BELD gene	No	429.152	432.409	421.838	419.701	1.351	1.362	1.328	1.322	2.13484	317560
ENSMUSG00000050965	Prkca	chr11:107933387-108343928	-	BELD gene	No	717.918	763.577	662.378	645.989	1.749	1.86	1.613	1.574	2.52834	410542
ENSMUSG00000021219	Rgs6	chr12:82616925-83133744	+	BELD gene	No	670.905	721	696.492	678.965	1.298	1.395	1.348	1.314	9.55887	516820
ENSMUSG00000061689	Dlgap4	chr2:156613705-156764363	+	BELD gene	No	491.934	515.948	496.701	438.154	3.265	3.425	3.297	2.908	0.975473	150659
ENSMUSG00000058248	Kcnh1	chr1:192190784-192510159	+	BELD gene	No	1013.3	1065.98	801.893	756.496	3.173	3.338	2.511	2.369	7.74229	319376
ENSMUSG00000025085	Ablim1	chr19:57032733-57314919	-	BELD gene	No	558.276	564.326	524.933	506.64	1.978	2	1.86	1.795	1.67882	282187
ENSMUSG00000031748	Gnao1	chr8:93809966-93969388	+	BELD gene	No	499.781	519.417	496.748	465.91	3.135	3.258	3.116	2.922	0.103577	159423
ENSMUSG00000033565	Rbfox2	chr15:77078990-77307053	-	BELD gene	No	580.584	590.458	568.129	529.744	2.546	2.589	2.491	2.323	1.29337	228064
ENSMUSG00000036298	Slc2a13	chr15:91267696-91573261	-	BELD gene	No	423.412	434.023	406.216	399.543	1.386	1.42	1.329	1.308	1.16759	305566
ENSMUSG00000038665	Dgki	chr6:36846022-37300184	-	BELD gene	No	626.144	678.722	730.841	696.436	1.379	1.494	1.609	1.533	2.84883	454163
ENSMUSG00000025583	Rptor	chr11:119602905-119899576	+	BELD gene	No	531.099	573.176	518.346	503.59	1.79	1.932	1.747	1.697	3.97553	296672
ENSMUSG00000032503	Arpp21	chr9:112065091-112235938	-	BELD gene	No	725.184	677.945	577.446	541.528	4.245	3.968	3.38	3.17	1.44568	170848
ENSMUSG00000020524	Gria1	chr11:57011387-57330244	+	BELD gene	No	652.666	736.01	555.33	549.075	2.047	2.308	1.742	1.722	0.15697	318858
ENSMUSG00000030518	Fam189a1	chr7:64756113-65156570	-	BELD gene	No	616.479	551.469	672.965	650.589	1.539	1.377	1.68	1.625	2.4605	400458
ENSMUSG00000048058	Ldlrad3	chr2:101950203-102186385	-	BELD gene	No	367.243	400.536	390.83	374.061	1.555	1.696	1.655	1.584	4.84816	236183
ENSMUSG00000040640	Erc2	chr14:27622442-28478537	+	BELD gene	No	1343.55	1420.83	1310.92	1263.08	1.569	1.66	1.531	1.475	2.06338	856096
ENSMUSG00000005533	Igf1r	chr7:67952859-68226780	+	BELD gene	No	421.668	386.244	477.221	461.516	1.539	1.41	1.742	1.685	1.1937	273922
ENSMUSG00000021458	2010111I01Rik	chr13:63014934-63326096	+	BELD gene	No	509.809	532.632	495.666	478.832	1.638	1.712	1.593	1.539	0.725467	311163
ENSMUSG00000055254	Ntrk2	chr13:58806596-59133970	+	BELD gene	No	1000.58	953.021	785.753	719.436	3.056	2.911	2.4	2.198	1.38291	327375
ENSMUSG00000027035	Cers6	chr2:68861441-69114282	+	BELD gene	No	406.626	416.861	397.088	387.035	1.608	1.649	1.57	1.531	8.86484	252842
ENSMUSG00000034613	Ppm1h	chr10:122678762-122945795	+	BELD gene	No	513.297	498.786	471.151	435.156	1.922	1.868	1.764	1.63	1.43397	267034
ENSMUSG00000026640	Plxna2	chr1:194619829-194816869	+	BELD gene	No	465.048	503.869	442.354	420.063	2.36	2.557	2.245	2.132	20.4568	197041
ENSMUSG00000017412	Cacnb4	chr2:52428320-52676831	-	BELD gene	No	432.567	461.411	513.829	476.144	1.741	1.857	2.068	1.916	0.22561	248512
ENSMUSG00000027692	Tnik	chr3:28263214-28675858	+	BELD gene	No	674.901	705.213	729.242	705.636	1.636	1.709	1.767	1.71	18.4071	412645
ENSMUSG00000029120	Ppp2r2c	chr5:36868513-36955078	+	BELD gene	No	429.879	457.106	393.183	358.452	4.966	5.28	4.542	4.141	1.19932	86566
ENSMUSG00000028760	Eif4g3	chr4:137993022-138208508	+	BELD gene	No	463.45	512.002	478.538	452.678	2.151	2.376	2.221	2.101	0.818733	215487
ENSMUSG00000028161	Ppp3ca	chr3:136670124-136937727	+	BELD gene	No	625.926	671.068	707.173	660.203	2.339	2.508	2.643	2.467	10.5621	267604
ENSMUSG00000035357	Pdzrn3	chr6:101149609-101377897	-	BELD gene	No	535.459	530.958	554.577	518.941	2.346	2.326	2.429	2.273	1.51662	228289
ENSMUSG00000002107	Celf2	chr2:6539694-7509563	-	BELD gene	No	2938.67	2853.14	2102.93	2032.71	3.03	2.942	2.168	2.096	0.0316227	969870
ENSMUSG00000054733	Msra	chr14:64122623-64455903	-	BELD gene	No	2305.26	2036.17	819.209	767.299	6.917	6.109	2.458	2.302	2.99468	333281
ENSMUSG00000029420	Rimbp2	chr5:128760401-128953362	-	BELD gene	No	565.833	601.162	470.727	434.329	2.932	3.115	2.439	2.251	1.69742	192962
ENSMUSG00000031822	Gse1	chr8:120230536-120581390	+	BELD gene	No	748.655	824.513	714.702	638.132	2.134	2.35	2.037	1.819	3.82718	350855
ENSMUSG00000074505	Fat3	chr9:15910205-16378231	-	BELD gene	No	614.445	682.788	609.254	611.978	1.313	1.459	1.302	1.308	1.58066	468027
ENSMUSG00000038296	Galnt18	chr7:111471661-111779977	-	BELD gene	No	562.636	596.079	570.905	544.992	1.825	1.933	1.852	1.768	25.1518	308317
ENSMUSG00000029478	Ncor2	chr5:125017153-125179219	-	BELD gene	No	390.059	451.425	412.004	370.133	2.407	2.785	2.542	2.284	0.438616	162067
ENSMUSG00000038807	Rap1gap2	chr11:74383356-74590186	-	BELD gene	No	534.369	580.532	528.227	484.672	2.584	2.807	2.554	2.343	8.88297	206831
ENSMUSG00000035864	Syt1	chr10:108497650-109010982	-	BELD gene	No	1624.33	1543.18	1162.28	1118.57	3.164	3.006	2.264	2.179	4.92562	513333
ENSMUSG00000027525	Phactr3	chr2:178118975-178338492	+	BELD gene	No	515.695	576.824	574.246	544.216	2.349	2.628	2.616	2.479	0.322188	219518
ENSMUSG00000052572	Dlg2	chr7:91090706-92447003	+	BELD gene	No	2341.66	2176.75	1979.46	1961.07	1.727	1.605	1.459	1.446	17.6502	1356298
ENSMUSG00000021767	Kat6b	chr14:21481434-21672478	+	BELD gene	No	470.28	481.384	388.195	377.576	2.462	2.52	2.032	1.976	0	191045
ENSMUSG00000026587	Astn1	chr1:158362304-158691786	+	BELD gene	No	518.02	542.559	476.891	482.553	1.572	1.647	1.447	1.465	9.49457	329483
ENSMUSG00000028804	Csmd2	chr4:127987857-128567656	+	BELD gene	No	945.065	1086.37	1115.7	1012.76	1.63	1.874	1.924	1.747	5.24625	579800
ENSMUSG00000039706	Ldb2	chr5:44472133-44799707	-	BELD gene	No	505.086	463.744	446.071	442.547	1.542	1.416	1.362	1.351	5.71366	327575
ENSMUSG00000038170	Pde4dip	chr3:97689824-97888707	-	BELD gene	No	392.82	422.362	377.137	360.468	1.975	2.124	1.896	1.812	5.20442	198884
ENSMUSG00000040875	Osbpl10	chr9:114978569-115232225	+	BELD gene	No	400.813	477.079	394.641	356.953	1.58	1.881	1.556	1.407	0.777464	253657
ENSMUSG00000030068	Gm20696	chr6:99257484-99666797	-	BELD gene	No	596.134	603.793	579.187	563.289	1.456	1.475	1.415	1.376	0.95838	409314
ENSMUSG00000024639	Gnaq	chr19:16132831-16387463	+	BELD gene	No	412.803	436.714	547.99	527.573	1.621	1.715	2.152	2.072	5.29974	254633
ENSMUSG00000028944	Prkag2	chr5:24862744-25100642	-	BELD gene	No	539.383	519.716	438.119	394.116	2.267	2.185	1.842	1.657	1.53555	237899
ENSMUSG00000062257	Opcml	chr9:27790775-28925410	+	BELD gene	No	2050.14	2096.56	1830.54	1761.3	1.807	1.848	1.613	1.552	1.70913	1134636
ENSMUSG00000030257	Srgap3	chr6:112717971-112947266	-	BELD gene	No	588.141	610.431	573.587	539.668	2.565	2.662	2.502	2.354	2.10608	229296
ENSMUSG00000029406	Pitpnm2	chr5:124118690-124249760	-	BELD gene	No	605.652	580.89	415.674	364.448	4.621	4.432	3.171	2.781	0.285908	131071
ENSMUSG00000042700	Sipa1l1	chr12:82170016-82451782	+	BELD gene	No	576.078	608.577	724.16	681.343	2.045	2.16	2.57	2.418	2.08564	281767
ENSMUSG00000048078	Tenm4	chr7:96171244-96911093	+	BELD gene	No	1548.54	1612.31	1301.04	1234.91	2.093	2.179	1.759	1.669	0	739850
ENSMUSG00000056553	Ptprn2	chr12:116485720-117278167	+	BELD gene	No	1689.07	1760.13	1506.53	1459.86	2.131	2.221	1.901	1.842	4.71121	792448
ENSMUSG00000027784	Ppm1l	chr3:69316861-69560802	+	BELD gene	No	419.633	445.565	450.541	429.574	1.72	1.827	1.847	1.761	3.74067	243942
ENSMUSG00000028152	Tspan5	chr3:138742195-138904433	+	BELD gene	No	497.165	463.564	459.434	438.619	3.064	2.857	2.832	2.704	1.55765	162239
ENSMUSG00000046876	Atxn1	chr13:45549758-45964991	-	BELD gene	No	767.911	811.895	849.135	818.108	1.849	1.955	2.045	1.97	3.09526	415234
ENSMUSG00000024589	Nedd4l	chr18:64887756-65217826	+	BELD gene	No	971.587	943.693	794.741	754.687	2.944	2.859	2.408	2.286	0.635551	330071
ENSMUSG00000022377	Asap1	chr15:64086857-64382919	-	BELD gene	No	565.469	606.484	717.243	683.72	1.91	2.048	2.423	2.309	0.5169	296063
ENSMUSG00000046709	Mapk10	chr5:102907948-103211334	-	BELD gene	No	647.507	614.318	564.647	539.668	2.134	2.025	1.861	1.779	6.53374	303387
ENSMUSG00000089809	A930011G23Rik	chr5:99297244-99729065	-	BELD gene	No	701.641	650.497	603.043	596.42	1.625	1.506	1.397	1.381	2.25909	431822
ENSMUSG00000061887	Ssbp3	chr4:106910701-107049694	+	BELD gene	No	382.284	409.805	397.323	366.774	2.75	2.948	2.859	2.639	0.170897	138994
ENSMUSG00000027797	Dclk1	chr3:55242526-55539064	+	BELD gene	No	1118.08	988.422	848.053	807.512	3.77	3.333	2.86	2.723	1.18564	296539
ENSMUSG00000040896	Kcnd3	chr3:105452330-105674002	+	BELD gene	No	364.263	380.921	400.241	387.552	1.643	1.718	1.806	1.748	0.771735	221673
ENSMUSG00000022454	Nell2	chr15:95219451-95528706	-	BELD gene	No	660.95	651.752	526.063	504.572	2.137	2.107	1.701	1.632	1.51247	309256
ENSMUSG00000022332	Khdrbs3	chr15:68928420-69093512	+	BELD gene	No	396.381	371.712	540.979	515.53	2.401	2.252	3.277	3.123	2.1997	165093
ENSMUSG00000024544	Ldlrad4	chr18:67933257-68255549	+	BELD gene	No	771.326	762.501	715.078	686.615	2.393	2.366	2.219	2.13	0.823481	322293
ENSMUSG00000052928	Ctif	chr18:75431224-75697696	-	BELD gene	No	417.308	474.567	435.907	408.072	1.566	1.781	1.636	1.531	5.44919	266473
ENSMUSG00000028634	Hivep3	chr4:119733784-120138045	+	BELD gene	No	1103.04	1154.25	954.442	890.522	2.729	2.855	2.361	2.203	1.33322	404262
ENSMUSG00000017631	Abr	chr11:76416734-76622314	-	BELD gene	No	480.453	542.499	553.73	492.322	2.337	2.639	2.693	2.395	0.0344566	205581
ENSMUSG00000041992	Rapgef5	chr12:117516479-117756978	+	BELD gene	No	377.343	429.837	437.272	427.661	1.569	1.787	1.818	1.778	0	240500
ENSMUSG00000039913	Pak7	chr2:136081104-136387967	-	BELD gene	No	496.294	506.141	459.105	441.927	1.617	1.649	1.496	1.44	12.4019	306864
ENSMUSG00000070565	Rasal2	chr1:157135183-157412595	-	BELD gene	No	391.948	388.695	393.135	377.628	1.413	1.401	1.417	1.361	2.5885	277413
ENSMUSG00000043301	Kcnj6	chr16:94749266-94997696	-	BELD gene	No	660.804	686.855	553.401	503.28	2.66	2.765	2.228	2.026	11.5835	248431
ENSMUSG00000052534	Pbx1	chr1:168153527-168432270	-	BELD gene	No	665.527	672.862	600.596	583.705	2.388	2.414	2.155	2.094	5.40948	278744
ENSMUSG00000037990	Sh3rf3	chr10:58813359-59138916	+	BELD gene	No	494.041	509.311	543.002	513.049	1.518	1.564	1.668	1.576	8.88051	325558
ENSMUSG00000070498	Tmem132b	chr5:125531774-125792583	+	BELD gene	No	717.119	796.945	607.231	552.383	2.75	3.056	2.328	2.118	1.38715	260810
ENSMUSG00000036155	Mgat5	chr1:127204986-127483704	+	BELD gene	No	431.114	465.836	483.95	461.62	1.547	1.671	1.736	1.656	41.7174	278719
ENSMUSG00000039542	Ncam1	chr9:49504361-49798922	-	BELD gene	No	399.069	432.229	482.444	497.284	1.355	1.467	1.638	1.688	22.9655	294562
ENSMUSG00000024500	Ppp2r2b	chr18:42637432-43059471	-	BELD gene	No	579.348	587.109	709.291	694.213	1.373	1.391	1.681	1.645	6.90847	422040
ENSMUSG00000038831	Ralgps1	chr2:33133421-33371486	-	BELD gene	No	414.256	525.038	558.906	519.096	1.74	2.205	2.348	2.18	4.47809	238066
ENSMUSG00000025555	Farp1	chr14:121035200-121283744	+	BELD gene	No	443.903	498.606	480.091	469.063	1.786	2.006	1.932	1.887	0.706721	248545
ENSMUSG00000041794	Myrip	chr9:120303936-120474841	+	BELD gene	No	541.127	582.505	443.577	404.35	3.166	3.408	2.595	2.366	1.9278	170906
