# Supplementary material for: Long genes linked to autism spectrum disorders harbor broad enhancer-like chromatin domains
Source: HighWire-hosted journal article supplement (doi:10.1101/gr.233775.117), 2018-05-30
Supplement: Supplemental_Table_S2.xlsx [file Supplemental_Table_S2.xlsx]

## Sheet: Supplemental_Table_S2
Supplemental Table S2. List of non-BELD genes in the mouse cortex.
Ensembl ID	Gene Symbol	Chromosome loci	Strand	Category	SFARI genes	CPM of H3K27ac rep1	CPM of H3K27ac rep2	CPM of H3K4me1 rep1	CPM of H3K4me1 rep2	RPKM of H3K27ac rep1	RPKM of H3K27ac rep2	RPKM of H3K4me1 rep1	RPKM of H3K4me1 rep2	Pausing index	Gene length
ENSMUSG00000045215	Asxl3	chr18:22344883-22530227	+	length-matched non-BED genes	Yes	156.445	148.422	165.771	178.993	0.844	0.801	0.894	0.966	6.48285	185345
ENSMUSG00000038240	Pdss2	chr10:43221486-43464882	+	length-matched non-BED genes	No	178.608	172.222	201.203	207.163	0.734	0.708	0.827	0.851	34.6914	243397
ENSMUSG00000035354	Uvrag	chr7:98886743-99141144	-	length-matched non-BED genes	No	242.261	269.276	311.685	307.953	0.952	1.058	1.225	1.21	42.1545	254402
ENSMUSG00000039197	Adk	chr14:21052574-21448568	+	length-matched non-BED genes	Yes	342.828	339.182	324.06	343.773	0.866	0.857	0.818	0.868	4.30687	395995
ENSMUSG00000022956	Atp5o	chr16:91684398-91931687	-	length-matched non-BED genes	No	264.932	278.485	307.497	302.681	1.071	1.126	1.243	1.224	49.4748	247290
ENSMUSG00000003992	Ssbp2	chr13:91460283-91703429	+	length-matched non-BED genes	No	215.739	223.35	232.07	236.211	0.887	0.919	0.954	0.971	0.308833	243147
ENSMUSG00000036792	Mbd5	chr2:48949510-49322284	+	length-matched non-BED genes	Yes	209.344	204.872	248.962	255.594	0.562	0.55	0.668	0.686	4.5558	372775
ENSMUSG00000025658	Cnksr2	chrX:157821436-158043294	-	length-matched non-BED genes	No	199.971	186.693	231.835	223.651	0.901	0.841	1.045	1.008	1.72048	221859
ENSMUSG00000059921	Unc5c	chr3:141465564-141834924	+	length-matched non-BED genes	No	289.638	300.551	310.885	326.302	0.784	0.814	0.842	0.883	27.9469	369361
ENSMUSG00000040560	Wdr7	chr18:63708695-63989760	+	length-matched non-BED genes	No	261.226	287.814	267.078	274.925	0.929	1.024	0.95	0.978	3.45586	281066
ENSMUSG00000040537	Adam22	chr5:8072352-8368160	-	length-matched non-BED genes	No	279.61	274.957	295.122	288.622	0.945	0.93	0.998	0.976	6.49611	295809
ENSMUSG00000060961	Slc4a4	chr5:88886818-89239653	+	length-matched non-BED genes	No	280.409	266.525	361.233	363.672	0.795	0.755	1.024	1.031	3.04278	352836
ENSMUSG00000026987	Baz2b	chr2:59899363-60209839	-	length-matched non-BED genes	No	151.94	150.814	205.343	216.518	0.489	0.486	0.661	0.697	12.5273	310477
ENSMUSG00000021700	Rab3c	chr13:110054187-110280206	-	length-matched non-BED genes	No	228.891	212.048	220.259	234.764	1.013	0.938	0.975	1.039	19.1363	226020
ENSMUSG00000040387	Klhl32	chr4:24612554-24851124	-	length-matched non-BED genes	No	151.213	151.232	178.57	191.088	0.634	0.634	0.748	0.801	9.89558	238571
ENSMUSG00000053333	Dis3l2	chr1:86703804-87050097	+	length-matched non-BED genes	No	291.091	296.126	287.029	301.234	0.841	0.855	0.829	0.87	5.49831	346294
ENSMUSG00000073514	Dok6	chr18:89301082-89769528	-	length-matched non-BED genes	No	258.029	237.044	251.974	271.307	0.551	0.506	0.538	0.579	4.04182	468447
ENSMUSG00000038056	Kmt2c	chr5:25271798-25498783	-	length-matched non-BED genes	Yes	155.718	161.398	171.7	182.456	0.686	0.711	0.756	0.804	16.8998	226986
ENSMUSG00000031012	Cask	chrX:13517080-13851367	-	length-matched non-BED genes	No	269.074	271.907	240.587	222.669	0.805	0.813	0.72	0.666	0	334288
ENSMUSG00000022788	Fgd4	chr16:16416917-16600549	-	length-matched non-BED genes	No	119.605	111.466	134.715	144.001	0.651	0.607	0.734	0.784	0.174162	183633
ENSMUSG00000035653	Lrfn5	chr12:61523150-61857928	+	length-matched non-BED genes	Yes	299.084	273.343	287.123	290.38	0.893	0.816	0.858	0.867	5.25345	334779
ENSMUSG00000039717	Ralyl	chr3:13946372-14182287	+	length-matched non-BED genes	No	104.418	97.3532	128.081	131.544	0.443	0.413	0.543	0.558	10.6644	235916
ENSMUSG00000071454	Dtnb	chr12:3572381-3781796	+	length-matched non-BED genes	No	207.237	208.64	214.848	212.487	0.99	0.996	1.026	1.015	2.22772	209416
ENSMUSG00000023923	Tbc1d5	chr17:50733127-51179349	-	length-matched non-BED genes	Yes	248.801	239.436	242.939	271.204	0.558	0.537	0.544	0.608	23.6236	446223
ENSMUSG00000026727	Rsu1	chr2:13076967-13271431	-	length-matched non-BED genes	No	136.172	132.216	169.629	176.874	0.7	0.68	0.872	0.91	27.3062	194465
ENSMUSG00000064127	Med14	chrX:12675369-12762073	-	length-matched non-BED genes	No	45.7782	42.5173	42.772	44.9163	0.528	0.49	0.493	0.518	9.3124	86705
ENSMUSG00000053819	Camk2d	chr3:126596302-126844913	+	length-matched non-BED genes	No	159.642	146.747	201.861	211.04	0.642	0.59	0.812	0.849	12.3103	248612
ENSMUSG00000074305	C230081A13Rik	chr9:56201131-56418050	-	length-matched non-BED genes	No	150.995	158.408	201.579	208.042	0.696	0.73	0.929	0.959	18.9353	216920
ENSMUSG00000039828	Wdr70	chr15:7873055-8099209	-	length-matched non-BED genes	No	123.674	113.798	143.514	150.048	0.547	0.503	0.635	0.663	26.0651	226155
ENSMUSG00000028496	Mllt3	chr4:87769925-88033364	-	length-matched non-BED genes	No	222.496	233.815	332.295	329.714	0.845	0.888	1.261	1.252	4.01263	263440
ENSMUSG00000052698	Tln2	chr9:67217087-67559703	-	length-matched non-BED genes	No	206.074	223.41	274.983	287.537	0.601	0.652	0.803	0.839	2.6663	342617
ENSMUSG00000030172	Erc1	chr6:119570796-119848167	-	length-matched non-BED genes	No	159.57	170.009	224.494	224.323	0.575	0.613	0.809	0.809	49.4191	277372
ENSMUSG00000030852	Tacc2	chr7:130577484-130764784	+	length-matched non-BED genes	No	189.87	208.7	240.54	236.831	1.014	1.114	1.284	1.264	0	187301
ENSMUSG00000012609	Ttll5	chr12:85824659-86061893	+	length-matched non-BED genes	No	230.998	256.838	256.114	254.819	0.974	1.083	1.08	1.074	9.03563	237235
ENSMUSG00000044340	Phlpp1	chr1:106171752-106394250	+	length-matched non-BED genes	No	174.611	189.444	265.619	269.705	0.785	0.851	1.194	1.212	3.73442	222499
ENSMUSG00000038368	Focad	chr4:88094629-88411011	+	length-matched non-BED genes	No	271.109	271.01	289.146	302.526	0.857	0.857	0.914	0.956	12.432	316383
ENSMUSG00000000804	Usp32	chr11:84984442-85140161	-	length-matched non-BED genes	No	104.636	108.715	107.753	107.82	0.672	0.698	0.692	0.692	1.36767	155720
ENSMUSG00000027827	Kcnab1	chr3:65109384-65378223	+	length-matched non-BED genes	No	269.292	267.363	256.82	264.226	1.002	0.995	0.955	0.983	10.0213	268840
ENSMUSG00000038290	Smg6	chr11:74925823-75164448	+	length-matched non-BED genes	Yes	257.956	286.977	250.562	238.175	1.081	1.203	1.05	0.998	23.5226	238626
ENSMUSG00000025892	Gria4	chr9:4417899-4796234	-	length-matched non-BED genes	No	271.98	257.257	264.161	285.004	0.719	0.68	0.698	0.753	48.6137	378336
ENSMUSG00000027977	Ndst3	chr3:123526166-123690852	-	length-matched non-BED genes	No	177.663	167.617	147.702	157.595	1.079	1.018	0.897	0.957	5.57903	164687
ENSMUSG00000040452	Cdh12	chr15:21111452-21589533	+	length-matched non-BED genes	No	267.621	249.602	280.63	276.062	0.56	0.522	0.587	0.577	3.43305	478082
ENSMUSG00000056073	Grik2	chr10:49099460-49788766	-	length-matched non-BED genes	Yes	365.499	312.87	330.507	372.769	0.53	0.454	0.479	0.541	40.1169	689307
ENSMUSG00000039601	Rcan2	chr17:43801851-44039516	+	length-matched non-BED genes	No	236.593	240.872	272.207	268.568	0.995	1.013	1.145	1.13	0.686625	237666
ENSMUSG00000026425	Srgap2	chr1:131285251-131527361	-	length-matched non-BED genes	No	266.531	270.113	301.145	308.212	1.101	1.116	1.244	1.273	6.47603	242111
ENSMUSG00000028207	Asph	chr4:9448069-9669344	-	length-matched non-BED genes	No	186.165	191.537	220.589	230.112	0.841	0.866	0.997	1.04	7.35067	221276
ENSMUSG00000028397	Kdm4c	chr4:74242497-74405860	+	length-matched non-BED genes	No	93.2276	84.0778	99.6602	100.584	0.571	0.515	0.61	0.616	0	163364
ENSMUSG00000007440	Pcdha2	chr18:36930285-37187657	+	length-matched non-BED genes	Yes	234.704	223.948	208.731	210.213	0.912	0.87	0.811	0.817	0.0511972	257373
ENSMUSG00000034780	B3galt1	chr2:67748212-68122689	+	length-matched non-BED genes	No	314.779	304.319	317.661	332.195	0.841	0.813	0.848	0.887	1.70909	374478
ENSMUSG00000027238	Frmd5	chr2:121545529-121807087	-	length-matched non-BED genes	No	326.478	343.368	347.352	318.498	1.248	1.313	1.328	1.218	15.2253	261559
ENSMUSG00000015882	Lcorl	chr5:45697181-45857615	-	length-matched non-BED genes	No	73.2451	65.1214	84.7441	89.0056	0.457	0.406	0.528	0.555	6.75131	160435
ENSMUSG00000021027	Ralgapa1	chr12:55602929-55821167	-	length-matched non-BED genes	No	125.636	128.269	134.292	145.655	0.576	0.588	0.615	0.667	1.81695	218239
ENSMUSG00000057914	Cacnb2	chr2:14604306-14987908	+	length-matched non-BED genes	Yes	334.617	311.076	341.423	354.42	0.872	0.811	0.89	0.924	1.95353	383603
ENSMUSG00000071369	Map3k5	chr10:19934472-20142753	+	length-matched non-BED genes	No	211.161	224.487	247.221	243.189	1.014	1.078	1.187	1.168	3.1411	208282
ENSMUSG00000038349	Plcl1	chr1:55406388-55751802	+	length-matched non-BED genes	No	205.856	206.965	270.372	292.499	0.596	0.599	0.783	0.847	1.16262	345415
ENSMUSG00000022829	Stxbp5l	chr16:37114942-37384962	-	length-matched non-BED genes	No	243.496	251.516	225.153	226.804	0.902	0.931	0.834	0.84	10.9183	270021
ENSMUSG00000040929	Rfx3	chr19:27761721-28011166	-	length-matched non-BED genes	No	246.475	255.762	261.29	270.377	0.988	1.025	1.047	1.084	16.0897	249446
ENSMUSG00000038696	Mapkap1	chr2:34406771-34624950	+	length-matched non-BED genes	No	153.466	168.574	217.86	215.898	0.703	0.773	0.999	0.99	49.5488	218180
ENSMUSG00000032228	Tcf12	chr9:71842688-72111871	-	length-matched non-BED genes	No	169.234	172.581	226.8	239.881	0.629	0.641	0.843	0.891	1.61626	269184
ENSMUSG00000035131	Brinp3	chr1:146495629-146902472	+	length-matched non-BED genes	No	235.431	204.872	203.038	226.132	0.579	0.504	0.499	0.556	4.28431	406844
ENSMUSG00000037148	Arhgap10	chr8:77250366-77517907	-	length-matched non-BED genes	No	280.773	291.043	322.978	331.264	1.049	1.088	1.207	1.238	5.49169	267542
ENSMUSG00000031618	Nr3c2	chr8:76899442-77245012	+	length-matched non-BED genes	Yes	185.874	174.674	245.763	271.204	0.538	0.505	0.711	0.785	1.01889	345571
ENSMUSG00000072294	Klf12	chr14:99874486-100149764	-	length-matched non-BED genes	No	135.227	130.781	175.323	196.464	0.491	0.475	0.637	0.714	0.683252	275279
ENSMUSG00000032827	Ppp1r9a	chr6:4902917-5165661	+	length-matched non-BED genes	No	217.555	232.858	271.925	271.876	0.828	0.886	1.035	1.035	0.529442	262745
ENSMUSG00000026839	Upp2	chr2:58567298-58792971	+	length-matched non-BED genes	No	145.328	135.206	165.865	170.413	0.644	0.599	0.735	0.755	2.97275	225674
ENSMUSG00000032878	Ccdc85a	chr11:28385685-28584324	-	length-matched non-BED genes	No	152.231	162.116	179.511	181.629	0.766	0.816	0.904	0.914	21.0226	198640
ENSMUSG00000059439	Bcas3	chr11:85353167-85826058	+	length-matched non-BED genes	No	232.96	228.613	343.447	367.911	0.493	0.483	0.726	0.778	41.8515	472892
ENSMUSG00000028434	Epb4.1l4b	chr4:56991972-57143437	-	length-matched non-BED genes	No	133.629	159.664	181.863	182.973	0.882	1.054	1.201	1.208	0.577614	151466
ENSMUSG00000074968	Ano3	chr2:110655201-110950923	-	length-matched non-BED genes	No	296.468	270.771	243.975	242.259	1.003	0.916	0.825	0.819	0.485032	295723
ENSMUSG00000024302	Dtna	chr18:23415415-23659714	+	length-matched non-BED genes	No	259.555	263.954	289.429	286.09	1.062	1.08	1.185	1.171	6.40052	244300
ENSMUSG00000041592	Sdk2	chr11:113776374-114067046	-	length-matched non-BED genes	No	319.939	330.989	372.996	343.824	1.101	1.139	1.283	1.183	1.20949	290673
ENSMUSG00000058318	Phf21a	chr2:92093117-92364666	+	length-matched non-BED genes	No	216.175	222.453	249.762	253.837	0.796	0.819	0.92	0.935	0	271550
ENSMUSG00000032355	Mlip	chr9:77102081-77352969	-	length-matched non-BED genes	No	288.984	284.884	259.408	256.008	1.152	1.135	1.034	1.02	0	250889
ENSMUSG00000042302	Ehbp1	chr11:22005828-22342292	-	length-matched non-BED genes	No	208.836	199.789	245.48	254.664	0.621	0.594	0.73	0.757	0	336465
ENSMUSG00000037286	Stag1	chr9:100597798-100958545	+	length-matched non-BED genes	No	192.196	181.909	214.707	226.494	0.533	0.504	0.595	0.628	0	360748
ENSMUSG00000055022	Cntn1	chr15:92051165-92341967	+	length-matched non-BED genes	No	305.624	298.458	300.11	312.864	1.051	1.026	1.032	1.076	6.49345	290803
ENSMUSG00000042331	Specc1	chr11:61956779-62223013	+	length-matched non-BED genes	No	167.199	178.321	233.529	233.782	0.628	0.67	0.877	0.878	20.0331	266235
ENSMUSG00000024251	Thada	chr17:84190056-84466196	-	length-matched non-BED genes	No	207.746	218.028	223.459	239.157	0.752	0.79	0.809	0.866	27.8476	276141
ENSMUSG00000037736	Limch1	chr5:66745835-67057159	+	length-matched non-BED genes	No	239.354	239.436	328.201	336.691	0.769	0.769	1.054	1.081	4.20433	311325
ENSMUSG00000039033	Tasp1	chr2:139833480-140066805	-	length-matched non-BED genes	No	109.068	106.682	144.597	152.529	0.467	0.457	0.62	0.654	7.14655	233326
ENSMUSG00000033713	Foxn3	chr12:99194980-99450111	-	length-matched non-BED genes	No	192.922	218.148	288.676	290.896	0.756	0.855	1.131	1.14	0.573032	255132
ENSMUSG00000030075	Cntn3	chr6:102163306-102464667	-	length-matched non-BED genes	Yes	283.534	285.661	261.432	261.641	0.941	0.948	0.868	0.868	0.213592	301362
ENSMUSG00000038371	Sbf2	chr7:110308013-110614922	-	length-matched non-BED genes	No	185.075	185.856	220.495	234.144	0.603	0.606	0.718	0.763	1.00805	306910
ENSMUSG00000010517	Faf1	chr4:109676588-109963960	+	length-matched non-BED genes	No	167.127	177.126	202.944	205.871	0.582	0.616	0.706	0.716	6.30814	287373
ENSMUSG00000037926	Ssh2	chr11:77216287-77460220	+	length-matched non-BED genes	No	186.237	194.946	213.625	219.568	0.763	0.799	0.876	0.9	6.08425	243934
ENSMUSG00000040855	Reps2	chrX:162411954-162643649	-	length-matched non-BED genes	No	230.344	244.22	196.827	193.983	0.994	1.054	0.85	0.837	22.4681	231696
ENSMUSG00000053617	Sh3pxd2a	chr19:47260174-47464411	-	length-matched non-BED genes	No	192.05	236.327	241.387	237.038	0.94	1.157	1.182	1.161	0.700911	204238
ENSMUSG00000046314	Stxbp6	chr12:44852488-45074493	-	length-matched non-BED genes	No	205.13	207.803	230.847	239.002	0.924	0.936	1.04	1.077	5.69336	222006
ENSMUSG00000033216	Eefsec	chr6:88257334-88446539	-	length-matched non-BED genes	No	137.916	144.834	205.202	195.792	0.729	0.765	1.085	1.035	57.8025	189206
ENSMUSG00000022270	Fam134b	chr15:25843264-25973687	+	length-matched non-BED genes	No	82.2554	79.1145	134.857	138.677	0.631	0.607	1.034	1.063	0.484562	130424
ENSMUSG00000039842	Mcph1	chr8:18595131-18803189	+	length-matched non-BED genes	Yes	133.047	138.376	183.51	182.922	0.639	0.665	0.882	0.879	0.507916	208059
ENSMUSG00000053702	Nebl	chr2:17343909-17731464	-	length-matched non-BED genes	No	229.036	216.294	301.333	316.74	0.591	0.558	0.778	0.817	1.46695	387556
ENSMUSG00000064302	Clasp1	chr1:118389058-118609432	+	length-matched non-BED genes	No	219.445	228.314	241.292	236.315	0.996	1.036	1.095	1.072	0.605541	220375
ENSMUSG00000036890	Gtdc1	chr2:44564412-44927657	-	length-matched non-BED genes	No	360.994	340.378	275.454	279.008	0.994	0.937	0.758	0.768	0.180729	363246
ENSMUSG00000021061	Sptb	chr12:76580488-76710547	-	length-matched non-BED genes	No	113.428	132.276	148.173	150.875	0.872	1.017	1.139	1.16	0.594576	130060
ENSMUSG00000089872	Rps6kc1	chr1:190700202-190911770	-	length-matched non-BED genes	No	166.182	190.879	236.164	229.802	0.785	0.902	1.116	1.086	4.83517	211569
ENSMUSG00000035681	Kcnc2	chr10:112271123-112466304	+	length-matched non-BED genes	No	102.674	87.307	117.964	125.91	0.526	0.447	0.604	0.645	1.68809	195182
ENSMUSG00000001986	Gria3	chrX:41400854-41678601	+	length-matched non-BED genes	No	229.835	224.726	209.249	208.403	0.827	0.809	0.753	0.75	2.66833	277748
ENSMUSG00000048332	Lhfp	chr3:53041528-53261679	+	length-matched non-BED genes	No	186.528	199.969	233.623	226.752	0.847	0.908	1.061	1.03	9.1963	220152
ENSMUSG00000028274	Rngtt	chr4:33310311-33502614	+	length-matched non-BED genes	No	124.473	123.366	139.891	142.812	0.647	0.642	0.727	0.743	31.4798	192304
ENSMUSG00000025920	Stau2	chr1:16228674-16520112	-	length-matched non-BED genes	No	192.268	199.311	218.612	220.395	0.66	0.684	0.75	0.756	2.34509	291439
ENSMUSG00000039943	Plcb4	chr2:135659011-136014593	+	length-matched non-BED genes	No	332.364	320.823	352.293	356.953	0.935	0.902	0.991	1.004	1.95945	355583
ENSMUSG00000097219	Gm26551	chr11:51949882-52269514	-	length-matched non-BED genes	No	253.379	245.954	266.56	262.779	0.793	0.769	0.834	0.822	0.078856	319633
ENSMUSG00000019828	Grm1	chr10:10686059-11082356	-	length-matched non-BED genes	Yes	335.707	319.747	325.66	356.436	0.847	0.807	0.822	0.899	18.8601	396298
ENSMUSG00000026970	Rbms1	chr2:60750193-60963192	-	length-matched non-BED genes	No	136.899	150.276	206.426	208.042	0.643	0.706	0.969	0.977	6.74065	213000
ENSMUSG00000035765	Dym	chr18:75018772-75286966	+	length-matched non-BED genes	No	230.053	242.068	289.758	289.966	0.858	0.903	1.08	1.081	12.2042	268195
ENSMUSG00000036766	Dner	chr1:84369841-84696221	-	length-matched non-BED genes	Yes	217.119	235.25	292.675	303.405	0.665	0.721	0.897	0.93	0.153415	326381
ENSMUSG00000038774	Ascc3	chr10:50592669-50851202	+	length-matched non-BED genes	No	114.445	107.998	131.939	143.794	0.443	0.418	0.51	0.556	2.81845	258534
ENSMUSG00000042082	Arsb	chr13:93771679-93943016	+	length-matched non-BED genes	No	159.424	189.982	198.238	190.106	0.93	1.109	1.157	1.11	4.11007	171338
ENSMUSG00000032340	Neo1	chr9:58874679-59036441	-	length-matched non-BED genes	Yes	99.4767	110.569	126.622	135.214	0.615	0.684	0.783	0.836	54.5179	161763
ENSMUSG00000029629	Phf14	chr6:11907809-12081197	+	length-matched non-BED genes	No	102.02	88.3236	103.754	110.094	0.588	0.509	0.598	0.635	17.5616	173389
ENSMUSG00000000127	Fer	chr17:63896018-64139494	+	length-matched non-BED genes	Yes	183.258	200.148	218.001	225.977	0.753	0.822	0.895	0.928	1.27738	243477
ENSMUSG00000036510	Cdh8	chr8:99024471-99416471	-	length-matched non-BED genes	Yes	311.437	300.312	324.907	342.739	0.794	0.766	0.829	0.874	58.3592	392001
ENSMUSG00000045658	Pid1	chr1:84036296-84364180	-	length-matched non-BED genes	No	191.178	203.318	246.28	258.333	0.583	0.62	0.751	0.788	0.804358	327885
ENSMUSG00000024064	Galnt14	chr17:73493228-73710453	-	length-matched non-BED genes	Yes	200.988	192.315	231.882	238.33	0.925	0.885	1.067	1.097	3.12034	217226
ENSMUSG00000053768	Chchd3	chr6:32790976-33060260	-	length-matched non-BED genes	No	178.898	170.368	254.279	263.709	0.664	0.633	0.944	0.979	14.4056	269285
ENSMUSG00000021730	Hcn1	chr13:117602480-117976802	+	length-matched non-BED genes	Yes	293.707	263.535	307.921	328.318	0.785	0.704	0.823	0.877	0.347703	374323
ENSMUSG00000021338	Lrrc16a	chr13:24012344-24280795	-	length-matched non-BED genes	No	277.648	298.339	331.824	332.66	1.034	1.111	1.236	1.239	2.57021	268452
ENSMUSG00000038679	Trps1	chr15:50654752-50890463	-	length-matched non-BED genes	No	156.954	160.143	194.192	213.469	0.666	0.679	0.824	0.906	0.819105	235712
ENSMUSG00000036893	Ehmt1	chr2:24790769-24919609	-	length-matched non-BED genes	Yes	98.8954	111.705	134.904	131.079	0.768	0.867	1.047	1.017	13.4887	128841
ENSMUSG00000057133	Chd6	chr2:160946978-161109075	-	length-matched non-BED genes	No	147.071	177.783	211.319	208.042	0.907	1.097	1.304	1.283	4.46039	162098
ENSMUSG00000039428	Tmem135	chr7:89139723-89404222	-	length-matched non-BED genes	No	202.587	202.72	264.961	273.478	0.766	0.766	1.002	1.034	2.47326	264500
ENSMUSG00000030621	Me3	chr7:89632392-89854359	+	length-matched non-BED genes	No	208.545	196.979	195.321	195.43	0.94	0.887	0.88	0.88	5.85064	221968
ENSMUSG00000031523	Dlc1	chr8:36567751-36953143	-	length-matched non-BED genes	No	277.721	270.293	285.241	272.134	0.721	0.701	0.74	0.706	0.495722	385393
ENSMUSG00000090053	Palm2	chr4:57434247-57712016	+	length-matched non-BED genes	No	274.669	275.974	315.026	323.46	0.989	0.994	1.134	1.164	5.36038	277770
ENSMUSG00000021852	Slc35f4	chr14:49298519-49526046	-	length-matched non-BED genes	No	168.217	164.747	211.884	210.988	0.739	0.724	0.931	0.927	0.62164	227528
ENSMUSG00000040430	Pitpnc1	chr11:107207892-107470699	-	length-matched non-BED genes	No	223.95	228.074	247.974	245.773	0.852	0.868	0.944	0.935	13.9882	262808
ENSMUSG00000020716	Nf1	chr11:79339693-79581612	+	length-matched non-BED genes	Yes	267.548	265.987	264.584	262.83	1.106	1.099	1.094	1.086	8.01374	241920
ENSMUSG00000019990	Pde7b	chr10:20398004-20725078	-	length-matched non-BED genes	No	223.441	200.746	256.35	263.761	0.683	0.614	0.784	0.806	32.1524	327075
ENSMUSG00000020647	Ncoa1	chr12:4247363-4477182	-	length-matched non-BED genes	No	175.774	195.185	219.554	229.078	0.765	0.849	0.955	0.997	43.8543	229820
ENSMUSG00000003746	Man1a	chr10:53904788-54075796	-	length-matched non-BED genes	No	171.704	162.594	168.03	178.476	1.004	0.951	0.983	1.044	22.8107	171009
ENSMUSG00000030301	Ccdc91	chr6:147475871-147632612	+	length-matched non-BED genes	No	65.6154	55.3741	96.4135	102.289	0.419	0.353	0.615	0.653	9.91496	156742
ENSMUSG00000043456	Zfp536	chr7:37472135-37773641	-	length-matched non-BED genes	No	117.425	102.556	172.311	194.706	0.389	0.34	0.572	0.646	3.60401	301507
ENSMUSG00000034135	Sik3	chr9:46012820-46224194	+	length-matched non-BED genes	No	154.774	163.431	256.209	249.598	0.732	0.773	1.212	1.181	0.528172	211375
ENSMUSG00000021676	Iqgap2	chr13:95627177-95891922	-	length-matched non-BED genes	No	262.026	272.027	270.325	262.623	0.99	1.028	1.021	0.992	1.38555	264746
ENSMUSG00000033769	Exoc6b	chr6:84618487-85069513	-	length-matched non-BED genes	Yes	253.233	255.642	347.258	358.297	0.561	0.567	0.77	0.794	25.9822	451027
ENSMUSG00000089862	Gm16039	chr6:8259288-8597480	+	length-matched non-BED genes	No	368.623	345.341	352.246	351.888	1.09	1.021	1.042	1.04	12.8513	338193
ENSMUSG00000056476	Med12l	chr3:59006978-59318410	+	length-matched non-BED genes	No	204.839	221.616	268.396	288.26	0.658	0.712	0.862	0.926	1.76497	311433
ENSMUSG00000001985	Grik3	chr4:125490700-125714173	+	length-matched non-BED genes	Yes	248.51	238.181	293.428	282.368	1.112	1.066	1.313	1.264	0.480639	223474
ENSMUSG00000051344	Plekhm3	chr1:64785983-64956824	-	length-matched non-BED genes	No	157.898	174.375	208.59	204.165	0.924	1.021	1.221	1.195	11.5265	170842
ENSMUSG00000041923	Nol4	chr18:22693181-23041653	-	length-matched non-BED genes	No	333.672	325.488	307.168	312.915	0.958	0.934	0.881	0.898	4.19731	348473
ENSMUSG00000026585	Kifap3	chr1:163779583-163917109	+	length-matched non-BED genes	No	84.8713	83.2406	78.9094	85.1291	0.617	0.605	0.574	0.619	17.4528	137527
ENSMUSG00000021301	Hecw1	chr13:14226438-14523226	-	length-matched non-BED genes	No	301.7	295.169	257.338	255.077	1.017	0.995	0.867	0.859	4.77719	296789
ENSMUSG00000070733	Fryl	chr5:73020322-73256618	-	length-matched non-BED genes	No	149.324	159.365	203.602	207.938	0.632	0.674	0.862	0.88	19.5974	236297
ENSMUSG00000022762	Ncam2	chr16:81200697-81624285	+	length-matched non-BED genes	No	301.627	270.831	262.467	286.296	0.712	0.639	0.62	0.676	28.7739	423589
ENSMUSG00000020576	Nbas	chr12:13269127-13583810	+	length-matched non-BED genes	No	174.538	169.411	215.601	228.148	0.555	0.538	0.685	0.725	53.0084	314684
ENSMUSG00000028354	Fmn2	chr1:174501825-174822717	+	length-matched non-BED genes	No	304.607	345.281	325.613	321.392	0.949	1.076	1.015	1.002	11.4369	320893
ENSMUSG00000054976	Nyap2	chr1:81076950-81341764	+	length-matched non-BED genes	No	280.119	282.312	273.477	285.624	1.058	1.066	1.033	1.079	2.52762	264815
ENSMUSG00000031284	Pak3	chrX:143518591-143797796	+	length-matched non-BED genes	No	125.999	124.861	132.692	132.475	0.451	0.447	0.475	0.474	10.5656	279206
ENSMUSG00000024983	Vti1a	chr19:55316351-55626561	+	length-matched non-BED genes	No	256.866	282.671	317.708	317.464	0.828	0.911	1.024	1.023	10.1433	310211
ENSMUSG00000058444	Map2k5	chr9:63163769-63377902	-	length-matched non-BED genes	No	130.213	143.518	189.486	197.187	0.608	0.67	0.885	0.921	5.83812	214134
ENSMUSG00000021708	Rasgrf2	chr13:91880400-92131656	-	length-matched non-BED genes	No	292.326	302.345	248.021	241.122	1.163	1.203	0.987	0.96	0.609239	251257
ENSMUSG00000033004	Mycbp2	chr14:103113411-103346814	-	length-matched non-BED genes	No	261.662	263.057	245.857	247.014	1.121	1.127	1.053	1.058	4.60855	233404
ENSMUSG00000054477	Kcnn2	chr18:45268860-45686024	+	length-matched non-BED genes	No	323.644	293.555	315.826	335.968	0.776	0.704	0.757	0.805	1.05885	417165
ENSMUSG00000029757	Dync1i1	chr6:5725639-6028039	+	length-matched non-BED genes	No	233.469	256.539	285.758	295.497	0.772	0.848	0.945	0.977	4.88269	302401
ENSMUSG00000039286	Fndc3b	chr3:27416162-27710439	-	length-matched non-BED genes	No	196.337	217.191	317.802	317.671	0.667	0.738	1.08	1.079	2.77191	294278
ENSMUSG00000037110	Ralgapa2	chr2:146239879-146512026	-	length-matched non-BED genes	No	247.856	272.087	280.347	289.139	0.911	1	1.03	1.062	19.3777	272148
ENSMUSG00000028565	Nfia	chr4:97772734-98118874	+	length-matched non-BED genes	Yes	354.672	324.112	300.157	331.781	1.025	0.936	0.867	0.959	2.27322	346141
ENSMUSG00000022197	Pdzd2	chr15:12357054-12592556	-	length-matched non-BED genes	No	184.421	206.965	252.868	256.318	0.783	0.879	1.074	1.088	0.914623	235503
ENSMUSG00000028226	Mmp16	chr4:17852893-18119145	+	length-matched non-BED genes	No	285.859	252.293	269.572	262.107	1.074	0.948	1.012	0.984	0.717731	266253
ENSMUSG00000042359	Osbpl6	chr2:76406508-76600647	+	length-matched non-BED genes	No	151.286	160.262	191.839	188.039	0.779	0.825	0.988	0.969	2.38686	194140
ENSMUSG00000047193	Dync2h1	chr9:6928503-7184446	-	length-matched non-BED genes	No	104.418	89.1009	111.283	122.809	0.408	0.348	0.435	0.48	20.0917	255944
ENSMUSG00000020532	Acaca	chr11:84129672-84401651	+	length-matched non-BED genes	No	167.272	182.806	196.827	209.23	0.615	0.672	0.724	0.769	37.4109	271980
ENSMUSG00000041624	Gucy1a2	chr9:3532354-3897342	+	length-matched non-BED genes	Yes	172.94	171.445	181.722	190.726	0.474	0.47	0.498	0.523	7.89304	364989
ENSMUSG00000058317	Ube2e2	chr14:18573575-18894267	-	length-matched non-BED genes	No	261.88	264.432	333.377	327.905	0.817	0.825	1.04	1.022	0.504948	320693
ENSMUSG00000022748	Cmss1	chr16:57302199-57606825	-	length-matched non-BED genes	No	162.04	150.874	193.674	208.3	0.532	0.495	0.636	0.684	0.17833	304627
ENSMUSG00000047454	Gphn	chr12:78226655-78684767	+	length-matched non-BED genes	Yes	156.3	143.04	186.522	204.527	0.341	0.312	0.407	0.446	9.40056	458113
ENSMUSG00000061601	Pclo	chr5:14514918-14860184	+	length-matched non-BED genes	No	259.918	262.519	300.486	298.443	0.753	0.76	0.87	0.864	31.2062	345267
ENSMUSG00000022376	Adcy8	chr15:64699042-64922296	-	length-matched non-BED genes	No	205.13	213.364	226.141	219.826	0.919	0.956	1.013	0.985	10.0382	223255
ENSMUSG00000035067	Xkr6	chr14:63606503-63820809	+	length-matched non-BED genes	No	135.881	134.847	267.784	247.014	0.634	0.629	1.25	1.153	0.228458	214307
ENSMUSG00000039585	Myo9a	chr9:59750896-59928866	+	length-matched non-BED genes	No	135.373	127.372	123.234	131.079	0.761	0.716	0.692	0.737	13.6068	177971
ENSMUSG00000047888	Tnrc6b	chr15:80711319-80941086	+	length-matched non-BED genes	Yes	200.697	213.244	256.067	264.794	0.873	0.928	1.114	1.152	0.957851	229768
ENSMUSG00000056602	Fry	chr5:150259930-150497752	+	length-matched non-BED genes	No	287.749	321.84	266.749	252.079	1.21	1.353	1.122	1.06	6.48594	237823
ENSMUSG00000034488	Edil3	chr13:88821472-89323223	+	length-matched non-BED genes	No	308.385	293.973	302.51	319.893	0.615	0.586	0.603	0.638	4.48622	501752
ENSMUSG00000069769	Msi2	chr11:88339382-88718513	-	length-matched non-BED genes	No	159.715	169.471	318.978	343.618	0.421	0.447	0.841	0.906	1.0165	379132
ENSMUSG00000030451	Herc2	chr7:56050155-56231794	+	length-matched non-BED genes	Yes	184.421	187.291	198.709	191.295	1.015	1.031	1.094	1.053	6.36581	181640
ENSMUSG00000061436	Hipk2	chr6:38694390-38876165	-	length-matched non-BED genes	No	141.84	153.086	198.191	209.851	0.78	0.842	1.09	1.154	2.00378	181776
ENSMUSG00000026904	Slc4a10	chr2:62046462-62326730	+	length-matched non-BED genes	Yes	308.748	294.452	229.952	227.476	1.102	1.051	0.82	0.812	17.0643	280269
ENSMUSG00000055567	Unc80	chr1:66468367-66699866	+	length-matched non-BED genes	No	230.053	240.931	195.744	200.185	0.994	1.041	0.846	0.865	10.8708	231500
ENSMUSG00000025790	Slco3a1	chr7:74275419-74554780	-	length-matched non-BED genes	No	212.033	234.473	318.508	329.404	0.759	0.839	1.14	1.179	2.14452	279362
ENSMUSG00000056268	Dennd1b	chr1:138963436-139176043	+	length-matched non-BED genes	No	131.231	123.904	161.536	165.606	0.617	0.583	0.76	0.779	7.72715	212608
ENSMUSG00000029245	Epha5	chr5:84057791-84417382	-	length-matched non-BED genes	No	310.71	273.761	272.583	283.764	0.864	0.761	0.758	0.789	12.6532	359592
ENSMUSG00000022523	Fgf12	chr16:28160120-28445227	-	length-matched non-BED genes	No	263.842	265.329	304.204	305.731	0.925	0.931	1.067	1.072	0.389627	285108
ENSMUSG00000021065	Fut8	chr12:77238104-77476338	+	length-matched non-BED genes	No	133.193	136.283	168.735	173.463	0.559	0.572	0.708	0.728	7.52051	238235
ENSMUSG00000031292	Cdkl5	chrX:160784308-160994702	-	length-matched non-BED genes	Yes	212.178	221.018	216.73	202.304	1.008	1.05	1.03	0.962	9.39541	210395
ENSMUSG00000095325	Zfp870	chr17:32879228-32886083	-	non-BED genes	No	1.81659	1.73418	3.10556	3.46305	0.265	0.253	0.453	0.505	0.610208	6856
ENSMUSG00000038594	Cep85l	chr10:53278081-53379851	-	non-BED genes	No	97.2968	100.881	120.693	123.74	0.956	0.991	1.186	1.216	12.1138	101771
ENSMUSG00000037419	Endod1	chr9:14353990-14381242	-	non-BED genes	No	28.7749	25.2951	30.585	30.1337	1.056	0.928	1.122	1.106	4.50027	27253
ENSMUSG00000054920	Klhl5	chr5:65107568-65168188	+	non-BED genes	No	53.1899	50.052	43.3837	52.7211	0.877	0.826	0.716	0.87	2.38792	60621
ENSMUSG00000031819	Emc8	chr8:120653914-120668573	-	non-BED genes	No	12.7162	17.8202	17.7864	14.9376	0.867	1.216	1.213	1.019	0	14660
ENSMUSG00000027562	Car2	chr3:14886426-14900769	+	non-BED genes	No	7.04839	5.80053	8.18738	8.1666	0.491	0.404	0.571	0.569	3.5361	14344
ENSMUSG00000044986	Tst	chr15:78399556-78405859	-	non-BED genes	No	4.06917	4.24575	4.23485	4.9103	0.645	0.674	0.672	0.779	6.0993	6304
ENSMUSG00000038388	Mpp6	chr6:50110241-50198598	+	non-BED genes	No	67.0687	75.9451	81.5444	88.954	0.759	0.86	0.923	1.007	2.90906	88358
ENSMUSG00000079487	Med12	chrX:101274030-101297465	+	non-BED genes	No	10.4636	14.1724	10.7753	9.35541	0.446	0.605	0.46	0.399	18.5256	23436
ENSMUSG00000049047	Armcx3	chrX:134756595-134761455	+	non-BED genes	No	6.03109	4.96334	1.55278	1.654	1.241	1.021	0.319	0.34	10.2942	4861
ENSMUSG00000049659	Aftph	chr11:20685084-20741589	-	non-BED genes	No	43.5983	45.0289	62.6288	64.6092	0.772	0.797	1.108	1.143	3.3127	56506
ENSMUSG00000044548	Dact1	chr12:71309884-71320107	+	non-BED genes	No	9.44629	10.4051	7.57568	5.84067	0.924	1.018	0.741	0.571	5.52653	10224
ENSMUSG00000045917	6330416G13Rik	chr4:63558781-63586357	+	non-BED genes	No	21.2905	23.8599	23.0564	24.2414	0.772	0.865	0.836	0.879	6.15472	27577
ENSMUSG00000049551	Fzd9	chr5:135248938-135251230	-	non-BED genes	No	0.799301	2.63117	2.11743	1.60231	0.349	1.147	0.923	0.699	39.7424	2293
ENSMUSG00000027663	Zmat3	chr3:32334796-32365678	-	non-BED genes	No	32.4807	31.574	32.4672	30.8057	1.052	1.022	1.051	0.997	3.36361	30883
ENSMUSG00000056131	Pgm3	chr9:86552476-86571842	-	non-BED genes	No	16.204	17.88	15.9042	15.6613	0.837	0.923	0.821	0.809	89.792	19367
ENSMUSG00000055831	Gm9982	chr1:178256103-178257295	+	non-BED genes	No	0.363319	0.418595	0.470539	0.465186	0.305	0.351	0.394	0.39	1.22963	1193
ENSMUSG00000055660	Mettl4	chr17:94727080-94749892	-	non-BED genes	No	23.1071	18.8368	17.8334	20.8817	1.013	0.826	0.782	0.915	48.506	22813
ENSMUSG00000038522	AI317395	chr10:40001575-40025268	-	non-BED genes	No	23.5431	21.0494	21.2684	20.4165	0.994	0.888	0.898	0.862	30.0463	23694
ENSMUSG00000034088	Hdlbp	chr1:93405940-93478808	-	non-BED genes	No	59.221	58.9621	61.5465	55.5639	0.813	0.809	0.845	0.763	1.64917	72869
ENSMUSG00000075273	Ttc30b	chr2:75935863-75938462	-	non-BED genes	No	2.76122	2.57137	0.799917	0.671936	1.062	0.989	0.308	0.258	1.09613	2600
ENSMUSG00000008200	Fnbp4	chr2:90745370-90781021	+	non-BED genes	No	27.5396	32.5308	33.2671	28.7899	0.772	0.912	0.933	0.808	5.07565	35652
ENSMUSG00000020097	Sgpl1	chr10:61098642-61147703	-	non-BED genes	No	31.6087	36.8962	32.6554	31.2709	0.644	0.752	0.666	0.637	6.27951	49062
ENSMUSG00000073643	Wdfy1	chr1:79702262-79776143	-	non-BED genes	No	62.7815	64.7028	72.8865	69.6746	0.85	0.876	0.987	0.943	2.14951	73882
ENSMUSG00000029094	Afap1	chr5:35893319-36003923	+	non-BED genes	No	61.2556	64.7028	103.989	104.977	0.554	0.585	0.94	0.949	30.6588	110605
ENSMUSG00000047648	Fbxo30	chr10:11281330-11298052	+	non-BED genes	No	5.95843	5.44174	10.446	12.0948	0.356	0.325	0.625	0.723	27.509	16723
ENSMUSG00000024537	Psmg2	chr18:67641599-67654162	+	non-BED genes	No	11.7715	12.1991	11.8105	13.8522	0.937	0.971	0.94	1.103	6.50552	12564
ENSMUSG00000032594	Ip6k1	chr9:108002501-108048780	+	non-BED genes	No	38.2938	43.1153	54.6766	55.3055	0.827	0.932	1.181	1.195	1.70503	46280
ENSMUSG00000031483	Erlin2	chr8:27023799-27039433	+	non-BED genes	No	17.4393	21.1092	17.8805	18.5041	1.115	1.35	1.144	1.184	3.33472	15635
ENSMUSG00000031902	Nfatc3	chr8:106059603-106130537	+	non-BED genes	No	47.0861	48.258	56.9823	57.3213	0.664	0.68	0.803	0.808	19.7692	70935
ENSMUSG00000041890	Git2	chr5:114727407-114775517	-	non-BED genes	No	41.8543	57.9455	51.9475	51.4289	0.87	1.204	1.08	1.069	0.069487	48111
ENSMUSG00000039231	Suv39h1	chrX:8061171-8074760	-	non-BED genes	No	3.56052	4.00655	4.51718	4.13499	0.262	0.295	0.332	0.304	14.873	13590
ENSMUSG00000029247	Paics	chr5:76951307-76967509	+	non-BED genes	No	16.858	17.4016	15.0102	15.2995	1.04	1.074	0.926	0.944	0.72211	16203
ENSMUSG00000025477	Inpp5a	chr7:139389109-139579652	+	non-BED genes	No	147.798	180.713	250.939	243.964	0.776	0.948	1.317	1.28	6.20797	190544
ENSMUSG00000056917	Sipa1	chr19:5651185-5663707	-	non-BED genes	No	6.6124	10.7639	11.9046	10.4925	0.528	0.86	0.951	0.838	11.3998	12523
ENSMUSG00000028106	Rprd2	chr3:95759873-95818953	-	non-BED genes	No	64.5981	62.0119	62.3464	60.681	1.093	1.05	1.055	1.027	5.59371	59081
ENSMUSG00000035476	Tab3	chrX:85574022-85634469	+	non-BED genes	No	19.5466	21.1092	32.1378	31.2192	0.323	0.349	0.532	0.516	1.99605	60448
ENSMUSG00000063145	Bbs5	chr2:69647171-69667571	+	non-BED genes	No	19.4739	16.086	13.2221	14.3174	0.955	0.788	0.648	0.702	14.4065	20401
ENSMUSG00000020363	Gfpt2	chr11:49794178-49838613	+	non-BED genes	No	37.4218	43.2947	52.0887	51.9975	0.842	0.974	1.172	1.17	103.195	44436
ENSMUSG00000031792	Usb1	chr8:95332292-95347507	+	non-BED genes	No	10.3183	13.993	9.88132	9.8206	0.678	0.92	0.649	0.645	35.0652	15216
ENSMUSG00000029263	Pigg	chr5:108312609-108349355	+	non-BED genes	No	34.2973	31.3946	27.3383	31.3742	0.933	0.854	0.744	0.854	43.489	36747
ENSMUSG00000057778	Cyb5d2	chr11:72777232-72796142	-	non-BED genes	No	21.8718	16.2056	12.4693	13.0769	1.157	0.857	0.659	0.691	2.22029	18911
ENSMUSG00000041702	Btbd7	chr12:102784656-102878406	-	non-BED genes	No	54.2072	56.6299	79.5211	84.3538	0.578	0.604	0.848	0.9	3.59424	93751
ENSMUSG00000029148	Nrbp1	chr5:31240864-31251566	+	non-BED genes	No	9.01031	12.4981	8.70497	7.59804	0.842	1.168	0.813	0.71	5.19149	10703
ENSMUSG00000055202	Zfp811	chr17:32797406-32800938	-	non-BED genes	No	0.944629	1.13619	0.799917	1.70568	0.267	0.322	0.226	0.483	1.21732	3533
ENSMUSG00000039740	Alg2	chr4:47465067-47474333	-	non-BED genes	No	8.64699	7.41511	11.5753	9.14866	0.933	0.8	1.249	0.987	4.44806	9267
ENSMUSG00000022680	Pdxdc1	chr16:13833148-13903131	-	non-BED genes	No	48.9027	52.444	49.1243	51.584	0.699	0.749	0.702	0.737	8.70536	69984
ENSMUSG00000036273	Lrrk2	chr15:91673175-91816120	+	non-BED genes	No	127.016	124.861	118.152	118.829	0.889	0.873	0.827	0.831	10.2359	142946
ENSMUSG00000037369	Kdm6a	chrX:18162575-18279936	+	non-BED genes	No	59.003	59.2611	57.3587	58.9753	0.503	0.505	0.489	0.503	3.75438	117362
ENSMUSG00000029387	Gtf2h3	chr5:124579140-124597680	+	non-BED genes	No	20.4912	22.0659	21.5036	15.2995	1.105	1.19	1.16	0.825	5.14612	18541
ENSMUSG00000030237	Slco1a4	chr6:141805440-141856199	-	non-BED genes	No	16.204	7.17592	14.3514	19.6929	0.319	0.141	0.283	0.388	12.8482	50760
ENSMUSG00000027508	Pag1	chr3:9687479-9833679	-	non-BED genes	No	81.6014	94.2437	152.737	158.939	0.558	0.645	1.045	1.087	124.394	146201
ENSMUSG00000045482	Trrap	chr5:144768092-144859778	+	non-BED genes	No	91.7017	115.771	93.9196	88.0236	1	1.263	1.024	0.96	8.73848	91687
ENSMUSG00000038545	Cul7	chr17:46650337-46664364	+	non-BED genes	No	15.3321	16.3252	11.4341	9.4071	1.093	1.164	0.815	0.671	1.84843	14028
ENSMUSG00000022283	Pabpc1	chr15:36595661-36608973	-	non-BED genes	No	11.5535	11.0031	12.6104	12.405	0.868	0.826	0.947	0.932	6.13138	13313
ENSMUSG00000047284	Neurl4	chr11:69901072-69913820	+	non-BED genes	No	15.8407	15.488	9.74016	9.97566	1.243	1.215	0.764	0.782	14.1339	12749
ENSMUSG00000020152	Actr2	chr11:20062304-20112913	-	non-BED genes	No	56.3144	58.7827	55.7589	57.1145	1.113	1.161	1.102	1.129	3.52691	50610
ENSMUSG00000008305	Tle1	chr4:72117142-72200919	-	non-BED genes	No	56.4597	73.1345	73.4982	81.3042	0.674	0.873	0.877	0.97	7.74302	83778
ENSMUSG00000029048	Rer1	chr4:155074110-155086382	-	non-BED genes	No	12.2802	14.7704	14.2573	12.1465	1.001	1.203	1.162	0.99	10.7928	12273
ENSMUSG00000004788	Eif2b2	chr12:85219481-85226628	+	non-BED genes	No	9.44629	8.91009	9.22257	7.33961	1.322	1.247	1.29	1.027	24.0029	7148
ENSMUSG00000023892	Zfp51	chr17:21450352-21465591	+	non-BED genes	No	13.0068	10.5247	10.5401	10.1824	0.853	0.691	0.692	0.668	10.804	15240
ENSMUSG00000038736	Nudcd1	chr15:44375227-44428307	-	non-BED genes	No	45.1242	40.8429	38.4901	40.4195	0.85	0.769	0.725	0.761	0.604564	53081
ENSMUSG00000021629	Slc30a5	chr13:100802649-100833427	-	non-BED genes	No	22.8164	24.4579	22.68	22.9492	0.741	0.795	0.737	0.746	8.05264	30779
ENSMUSG00000047227	Gm527	chr12:64917911-64924591	+	non-BED genes	No	6.90306	5.08294	7.48157	8.63179	1.033	0.761	1.12	1.292	4.50031	6681
ENSMUSG00000021952	Xpo4	chr14:57581002-57665430	-	non-BED genes	No	56.4597	55.4937	66.4872	69.8813	0.669	0.657	0.787	0.828	1.50605	84429
ENSMUSG00000062075	Lmnb2	chr10:80901203-80918245	-	non-BED genes	No	18.3113	21.2885	15.1043	13.387	1.074	1.249	0.886	0.785	4.88579	17043
ENSMUSG00000037071	Scd1	chr19:44394451-44407709	-	non-BED genes	No	11.8442	14.9498	15.5748	15.1444	0.893	1.128	1.175	1.142	10.9188	13259
ENSMUSG00000029776	Hibadh	chr6:52546228-52640389	-	non-BED genes	No	38.2211	35.2218	51.2888	58.8719	0.406	0.374	0.545	0.625	23.6745	94162
ENSMUSG00000026509	Capn2	chr1:182467256-182517495	-	non-BED genes	No	32.19	39.4675	39.7606	38.197	0.641	0.786	0.791	0.76	1.35541	50240
ENSMUSG00000034075	Zdhhc5	chr2:84687970-84715180	-	non-BED genes	No	24.0517	30.8564	31.4791	30.5989	0.884	1.134	1.157	1.125	1.87523	27211
ENSMUSG00000048874	Phf3	chr1:30802342-30863256	-	non-BED genes	No	58.567	58.3043	78.1095	76.9625	0.961	0.957	1.282	1.263	1.10426	60915
ENSMUSG00000031938	4931406C07Rik	chr9:15283337-15306448	-	non-BED genes	No	12.2075	16.3252	11.9517	11.9915	0.528	0.706	0.517	0.519	3.88747	23112
ENSMUSG00000026830	Ermn	chr2:58045113-58052864	-	non-BED genes	No	2.97921	1.49498	3.76431	4.13499	0.384	0.193	0.486	0.533	34.2905	7752
ENSMUSG00000031750	Il34	chr8:110741829-110805924	-	non-BED genes	No	80.8748	83.4798	79.6623	77.9962	1.262	1.302	1.243	1.217	4.42152	64096
ENSMUSG00000022842	Ece2	chr16:20611593-20646485	+	non-BED genes	No	36.1139	36.657	32.6084	31.3225	1.035	1.051	0.935	0.898	14.3579	34893
ENSMUSG00000022350	E430025E21Rik	chr15:59331998-59374167	-	non-BED genes	No	29.2835	30.6172	21.4566	25.0684	0.694	0.726	0.509	0.594	5.32611	42170
ENSMUSG00000025261	Huwe1	chrX:151800807-151935417	+	non-BED genes	Yes	68.6673	66.6762	59.1468	58.9753	0.51	0.495	0.439	0.438	0.861703	134611
ENSMUSG00000028411	Aptx	chr4:40682382-40703194	-	non-BED genes	No	20.7818	19.7936	14.0691	15.713	0.999	0.951	0.676	0.755	9.2128	20813
ENSMUSG00000019984	Med23	chr10:24869986-24913681	+	non-BED genes	No	33.934	33.8464	32.9377	33.3383	0.777	0.775	0.754	0.763	8.18016	43696
ENSMUSG00000034042	Gpbp1l1	chr4:116557658-116593882	+	non-BED genes	No	26.0136	32.172	28.5617	26.2572	0.718	0.888	0.788	0.725	33.3146	36225
ENSMUSG00000037197	Rbm17	chr2:11585439-11604153	-	non-BED genes	No	14.2421	15.1292	12.187	13.387	0.761	0.808	0.651	0.715	0	18715
ENSMUSG00000075595	Zfp652	chr11:95712673-95835115	+	non-BED genes	No	91.7017	99.1472	114.859	109.991	0.749	0.81	0.938	0.898	1.98533	122443
ENSMUSG00000043510	Hscb	chr5:110829070-110839777	-	non-BED genes	No	11.2629	9.74728	6.21112	5.3238	1.052	0.91	0.58	0.497	8.85462	10708
ENSMUSG00000045098	Suv420h1	chr19:3767421-3818303	+	non-BED genes	No	45.4149	54.537	55.9001	55.3572	0.893	1.072	1.099	1.088	4.14881	50883
ENSMUSG00000034190	Chmp7	chr14:69716979-69732570	-	non-BED genes	No	16.204	18.8966	15.716	16.5916	1.039	1.212	1.008	1.064	2.08566	15592
ENSMUSG00000079283	2310009B15Rik	chr1:138851979-138856854	-	non-BED genes	No	3.4152	2.45177	4.28191	4.60018	0.7	0.503	0.878	0.943	7.01478	4876
ENSMUSG00000036435	Exoc1	chr5:76529311-76570294	+	non-BED genes	No	40.619	39.2881	45.0306	43.2623	0.991	0.959	1.099	1.056	1.80346	40984
ENSMUSG00000008822	Acyp1	chr12:85272398-85288438	-	non-BED genes	No	17.6573	17.0428	15.4807	12.9735	1.101	1.062	0.965	0.809	2.12841	16041
ENSMUSG00000021713	Ppwd1	chr13:104205121-104228844	-	non-BED genes	No	21.1452	19.4946	18.4451	19.5895	0.891	0.822	0.777	0.826	33.1605	23724
ENSMUSG00000031533	Mrps31	chr8:22411340-22429665	+	non-BED genes	No	17.0033	14.5312	12.9869	12.2499	0.928	0.793	0.709	0.668	29.1583	18326
ENSMUSG00000031672	Got2	chr8:95864134-95888547	-	non-BED genes	No	30.5914	31.4544	31.9026	30.1337	1.253	1.288	1.307	1.234	6.27545	24414
ENSMUSG00000026889	Rbm18	chr2:36116079-36136773	-	non-BED genes	No	21.2905	20.6906	19.9509	19.3311	1.029	1	0.964	0.934	12.8708	20695
ENSMUSG00000010342	Tex14	chr11:87405065-87555823	+	non-BED genes	No	86.7605	75.6461	66.6754	70.4499	0.575	0.502	0.442	0.467	1.56493	150759
ENSMUSG00000041135	Ripk2	chr4:16122733-16163647	-	non-BED genes	No	26.7403	28.8233	35.4316	38.197	0.654	0.704	0.866	0.934	6.41321	40915
ENSMUSG00000030235	Slco1c1	chr6:141524386-141570177	+	non-BED genes	No	19.7645	15.7272	28.7499	31.1158	0.432	0.343	0.628	0.68	3.20734	45792
ENSMUSG00000014771	Pdcd2	chr17:15519208-15527301	-	non-BED genes	No	9.08297	10.1659	9.45784	8.68348	1.122	1.256	1.168	1.073	10.2788	8094
ENSMUSG00000032737	Inppl1	chr7:101822633-101838226	-	non-BED genes	No	14.6054	17.4016	11.6694	10.0273	0.937	1.116	0.748	0.643	1.29293	15594
ENSMUSG00000021238	Aldh6a1	chr12:84430723-84450950	-	non-BED genes	No	15.0414	15.3684	14.9161	15.2478	0.744	0.76	0.737	0.754	9.29191	20228
ENSMUSG00000053646	Plxnb1	chr9:109095436-109119911	+	non-BED genes	No	15.0414	19.076	20.092	21.3986	0.615	0.779	0.821	0.874	2.28501	24476
ENSMUSG00000035941	Ibtk	chr9:85687361-85749334	-	non-BED genes	No	40.2557	38.9891	49.4537	49.2581	0.65	0.629	0.798	0.795	8.74442	61974
ENSMUSG00000062519	Zfp398	chr6:47835661-47868257	+	non-BED genes	No	24.9237	27.3881	22.0212	23.6728	0.765	0.84	0.676	0.726	8.60308	32597
ENSMUSG00000040599	Mis12	chr11:71019611-71027371	+	non-BED genes	No	8.93764	7.17592	8.94024	8.78685	1.152	0.925	1.152	1.132	8.16954	7761
ENSMUSG00000044022	Pcdhb21	chr18:37513652-37518313	+	non-BED genes	No	1.67127	1.43518	1.8351	1.96412	0.358	0.308	0.394	0.421	1.72494	4662
ENSMUSG00000096952	Gm26572	chr8:121091628-121094858	-	non-BED genes	No	1.38061	1.73418	2.25859	1.49893	0.427	0.537	0.699	0.464	0.89085	3231
ENSMUSG00000040407	Akap9	chr5:3928054-4080209	+	non-BED genes	Yes	75.425	68.829	86.2498	91.59	0.496	0.452	0.567	0.602	20.6932	152156
ENSMUSG00000038342	Mlxip	chr5:123394798-123457932	+	non-BED genes	No	59.003	67.8722	75.051	71.0701	0.935	1.075	1.189	1.126	8.66876	63135
ENSMUSG00000023832	Acat2	chr17:12942890-12960747	-	non-BED genes	No	16.204	17.7604	19.0098	18.349	0.907	0.995	1.064	1.027	20.6038	17858
ENSMUSG00000026927	Sdccag3	chr2:26382802-26389316	-	non-BED genes	No	6.17642	8.4915	6.06995	5.99573	0.948	1.303	0.932	0.92	11.9245	6515
ENSMUSG00000026276	2017-09-02	chr1:93478964-93510260	+	non-BED genes	No	25.1417	22.0659	19.1509	21.0884	0.803	0.705	0.612	0.674	18.273	31297
ENSMUSG00000079036	Alkbh1	chr12:87425840-87443839	-	non-BED genes	No	17.076	21.1092	16.1395	17.522	0.949	1.173	0.897	0.973	8.44535	18000
ENSMUSG00000021314	Amph	chr13:18948371-19150913	+	non-BED genes	No	264.278	252.831	248.774	249.753	1.305	1.248	1.228	1.233	7.37442	202543
ENSMUSG00000033808	Tmem87a	chr2:120355312-120404113	-	non-BED genes	No	40.4737	38.0921	36.2315	37.2149	0.829	0.781	0.742	0.763	8.30493	48802
ENSMUSG00000044405	Adig	chr2:158502612-158508198	+	non-BED genes	No	2.32524	3.52816	3.85842	3.97993	0.416	0.631	0.691	0.712	2.48229	5587
ENSMUSG00000018736	Ndel1	chr11:68821434-68871858	-	non-BED genes	No	59.8749	60.5767	63.8522	60.8877	1.187	1.201	1.266	1.207	0	50425
ENSMUSG00000098239	Pclo	chr5:14861407-14863459	+	non-BED genes	No	0.290655	0.478394	0.564647	0.826998	0.142	0.233	0.275	0.403	1.16877	2053
ENSMUSG00000027804	Ppid	chr3:79591342-79603650	+	non-BED genes	No	14.1694	13.6342	13.5986	11.5263	1.151	1.108	1.105	0.936	2.8237	12309
ENSMUSG00000031389	Arhgap4	chrX:73891442-73921870	-	non-BED genes	No	18.4566	19.8534	11.7164	11.0094	0.607	0.652	0.385	0.362	5.00053	30429
ENSMUSG00000047466	8030462N17Rik	chr18:77633281-77714010	-	non-BED genes	No	55.6604	54.7762	80.0858	81.0975	0.689	0.679	0.992	1.005	10.3676	80730
ENSMUSG00000054414	Slc30a7	chr3:115938973-116007406	-	non-BED genes	No	53.8439	55.3741	59.2879	59.182	0.787	0.809	0.866	0.865	23.0284	68434
ENSMUSG00000048222	Mfap1b	chr2:121460235-121474067	-	non-BED genes	No	2.6159	2.57137	3.34083	2.27424	0.189	0.186	0.242	0.164	33.3495	13833
ENSMUSG00000055436	Srsf11	chr3:158010473-158036639	-	non-BED genes	No	29.7921	29.7202	25.4091	27.0325	1.139	1.136	0.971	1.033	3.30248	26167
ENSMUSG00000052812	Atad2b	chr12:4917404-5044047	+	non-BED genes	No	85.2346	85.3336	94.296	96.2936	0.673	0.674	0.745	0.76	17.3457	126644
ENSMUSG00000093910	Zfp853	chr5:143287755-143292356	-	non-BED genes	No	2.47057	3.28896	3.85842	3.35968	0.537	0.715	0.838	0.73	2.2225	4602
ENSMUSG00000072966	Gprasp2	chrX:135839034-135844730	+	non-BED genes	No	7.70236	5.08294	3.48199	3.46305	1.352	0.892	0.611	0.608	6.36547	5697
ENSMUSG00000022370	Mrpl13	chr15:55534094-55557748	-	non-BED genes	No	16.204	17.0428	16.1395	17.8321	0.685	0.72	0.682	0.754	0.497983	23655
ENSMUSG00000036634	Mag	chr7:30899183-30914327	-	non-BED genes	No	5.8131	4.66434	9.599	7.95985	0.384	0.308	0.634	0.526	1.74136	15145
ENSMUSG00000026311	Asb1	chr1:91540565-91559590	+	non-BED genes	No	14.4601	15.9066	19.8568	21.6053	0.76	0.836	1.044	1.136	12.5071	19026
ENSMUSG00000019715	Gle1	chr2:29935426-29960371	+	non-BED genes	No	11.2629	12.7372	12.7987	13.1286	0.451	0.511	0.513	0.526	27.4584	24946
ENSMUSG00000028096	Gpr89	chr3:96868281-96905346	-	non-BED genes	No	44.9789	49.0952	39.5253	44.6579	1.213	1.325	1.066	1.205	36.938	37066
ENSMUSG00000033409	Syce1l	chr8:113643213-113655533	+	non-BED genes	No	3.70585	3.10956	5.36415	6.09911	0.301	0.252	0.435	0.495	1.75841	12321
ENSMUSG00000029250	Polr2b	chr5:77310147-77349324	+	non-BED genes	No	23.9064	26.0725	25.0327	23.5177	0.61	0.665	0.639	0.6	4.0436	39178
ENSMUSG00000042548	Asxl1	chr2:153345845-153404007	+	non-BED genes	No	52.9719	62.6099	70.8161	72.3623	0.911	1.076	1.218	1.244	1.06864	58163
ENSMUSG00000037166	Ppp1r14a	chr7:29289320-29293390	+	non-BED genes	No	1.23528	2.45177	2.72913	2.11918	0.303	0.602	0.67	0.521	2.05689	4071
ENSMUSG00000030643	Rab30	chr7:92741603-92837117	+	non-BED genes	No	103.909	121.991	115.094	122.447	1.088	1.277	1.205	1.282	42.5363	95515
ENSMUSG00000025188	Hps1	chr19:42755105-42779978	-	non-BED genes	No	18.6019	21.2885	16.9394	17.6254	0.748	0.856	0.681	0.709	10.5081	24874
ENSMUSG00000029104	Htt	chr5:34761740-34912534	+	non-BED genes	No	111.612	130.123	142.856	141.158	0.74	0.863	0.947	0.936	4.51224	150795
ENSMUSG00000031563	Wwc2	chr8:47826083-47990543	-	non-BED genes	No	115.317	120.914	148.173	143.432	0.701	0.735	0.901	0.872	6.86204	164461
ENSMUSG00000027365	Trpm7	chr2:126791565-126876230	-	non-BED genes	No	63.7261	66.0184	63.0522	65.5396	0.753	0.78	0.745	0.774	43.3075	84666
ENSMUSG00000022789	Dnm1l	chr16:16312235-16359030	-	non-BED genes	No	40.0377	38.3911	36.3727	34.217	0.856	0.82	0.777	0.731	12.4411	46796
ENSMUSG00000026289	Atg16l1	chr1:87755870-87792428	+	non-BED genes	No	38.6571	40.6635	35.9021	37.2666	1.057	1.112	0.982	1.019	5.86114	36559
ENSMUSG00000022837	Iqcb1	chr16:36828385-36872721	+	non-BED genes	No	36.9132	37.9128	32.1849	37.0082	0.833	0.855	0.726	0.835	23.477	44337
ENSMUSG00000020137	Thap2	chr10:115369966-115384435	-	non-BED genes	No	15.986	13.096	14.5397	14.1106	1.105	0.905	1.005	0.975	6.7113	14470
ENSMUSG00000032571	Pik3r4	chr9:105642995-105687655	+	non-BED genes	No	36.1139	44.9691	41.2663	44.5545	0.809	1.007	0.924	0.998	7.503	44661
ENSMUSG00000090483	Tmem29	chrX:150408584-150440905	-	non-BED genes	No	15.9134	17.4016	16.3277	15.5579	0.492	0.538	0.505	0.481	6.07503	32322
ENSMUSG00000032020	Ubash3b	chr9:41011098-41161697	-	non-BED genes	No	140.822	152.369	175.229	167.415	0.935	1.012	1.164	1.112	0	150600
ENSMUSG00000005813	Metap1	chr3:138458960-138489382	-	non-BED genes	No	24.5604	25.7137	26.209	27.0325	0.807	0.845	0.861	0.889	5.25574	30423
ENSMUSG00000075232	Amd1	chr10:40287458-40302188	-	non-BED genes	No	14.0241	16.3252	18.2099	18.9176	0.952	1.108	1.236	1.284	0.694149	14731
ENSMUSG00000046185	Zfp84	chr7:29768552-29779821	+	non-BED genes	No	11.6262	11.9001	10.0225	9.71722	1.032	1.056	0.889	0.862	15.3862	11270
ENSMUSG00000090000	Ier3ip1	chr18:76930017-76941605	+	non-BED genes	No	13.1521	12.1393	15.1043	12.8702	1.135	1.047	1.303	1.111	28.9564	11589
ENSMUSG00000054693	Adam10	chr9:70678997-70780229	+	non-BED genes	No	73.3177	83.42	95.4253	97.1722	0.724	0.824	0.943	0.96	8.22751	101233
ENSMUSG00000056598	Lrrc48	chr11:60353329-60394341	+	non-BED genes	No	35.9686	42.9957	38.7724	39.3858	0.877	1.048	0.945	0.96	6.10042	41013
ENSMUSG00000055240	Zfp101	chr17:33360507-33394641	-	non-BED genes	No	16.5673	14.4714	16.0454	18.2973	0.485	0.424	0.47	0.536	31.5215	34135
ENSMUSG00000074342	I830077J02Rik	chr3:105925891-105932664	-	non-BED genes	No	2.6159	1.25579	1.64689	2.58437	0.386	0.185	0.243	0.382	1.6886	6774
ENSMUSG00000022451	Twf1	chr15:94577951-94589889	-	non-BED genes	No	10.3909	11.6609	9.78721	8.32167	0.87	0.977	0.82	0.697	3.51101	11939
ENSMUSG00000040738	Ints8	chr4:11199158-11254258	-	non-BED genes	No	42.2176	52.0852	44.8424	49.3614	0.766	0.945	0.814	0.896	25.8397	55101
ENSMUSG00000036197	Gxylt1	chr15:93239742-93275161	-	non-BED genes	No	27.8302	31.8132	39.243	40.006	0.786	0.898	1.108	1.129	29.0151	35420
ENSMUSG00000039994	Timeless	chr10:128232065-128252941	+	non-BED genes	No	18.6746	17.88	11.2929	12.5083	0.895	0.856	0.541	0.599	7.00684	20877
ENSMUSG00000026245	Farsb	chr1:78417958-78488859	-	non-BED genes	No	61.2556	56.4505	64.1345	64.7126	0.864	0.796	0.905	0.913	7.99897	70902
ENSMUSG00000027459	Fam110a	chr2:151969398-151980219	-	non-BED genes	No	8.86498	12.1991	14.0221	12.8185	0.819	1.127	1.296	1.184	33.276	10822
ENSMUSG00000058446	Znrf2	chr6:54816916-54893500	+	non-BED genes	No	34.588	34.6238	56.7	62.6968	0.452	0.452	0.74	0.819	3.64197	76585
ENSMUSG00000003134	Tbc1d8	chr1:39371499-39478747	-	non-BED genes	No	91.629	108.177	132.363	125.962	0.854	1.009	1.234	1.174	16.0596	107249
ENSMUSG00000001173	Ocrl	chrX:47912387-47965868	+	non-BED genes	No	26.9583	30.4976	31.432	32.7181	0.504	0.57	0.588	0.612	2.65178	53482
ENSMUSG00000001786	Fbxo7	chr10:86021972-86051873	+	non-BED genes	No	23.8337	22.4845	22.5388	21.2952	0.797	0.752	0.754	0.712	12.3539	29902
ENSMUSG00000050213	Snip1	chr4:125066672-125074042	+	non-BED genes	No	4.14183	5.74073	5.97585	7.90817	0.562	0.779	0.811	1.073	5.69204	7371
ENSMUSG00000035279	Ssc5d	chr7:4925844-4944821	+	non-BED genes	No	11.2629	13.6342	11.1988	10.0273	0.593	0.718	0.59	0.528	10.9139	18978
ENSMUSG00000004561	Mettl17	chr14:51884842-51893039	+	non-BED genes	No	8.79232	7.71411	6.91693	5.84067	1.072	0.941	0.844	0.712	6.12269	8198
ENSMUSG00000032314	Etfa	chr9:55454508-55512243	-	non-BED genes	No	30.0828	27.0293	36.7021	37.5767	0.521	0.468	0.636	0.651	11.7491	57736
ENSMUSG00000015023	Ddx19a	chr8:110974996-110997800	-	non-BED genes	No	13.8061	15.6076	11.1988	12.6117	0.605	0.684	0.491	0.553	23.4681	22805
ENSMUSG00000031311	Nono	chrX:101429318-101448591	+	non-BED genes	No	10.6816	9.44829	6.77576	5.22042	0.554	0.49	0.352	0.271	0.199049	19274
ENSMUSG00000020034	Tcp11l2	chr10:84576626-84614359	+	non-BED genes	No	29.8648	25.8333	29.4558	27.3943	0.791	0.685	0.781	0.726	2.71862	37734
ENSMUSG00000019737	Syne4	chr7:30314807-30319046	+	non-BED genes	No	2.6159	3.82715	3.48199	2.68774	0.617	0.903	0.821	0.634	4.59898	4240
ENSMUSG00000054519	Zfp867	chr11:59461197-59472474	-	non-BED genes	No	11.4082	10.0463	10.9165	10.4925	1.012	0.891	0.968	0.93	56.9069	11278
ENSMUSG00000066149	Cdc26	chr4:62383654-62408642	-	non-BED genes	No	21.9445	21.8267	21.9742	20.8817	0.878	0.873	0.879	0.836	13.1776	24989
ENSMUSG00000028389	Zfp37	chr4:62189540-62208446	-	non-BED genes	No	15.4774	13.2754	12.234	12.56	0.819	0.702	0.647	0.664	12.4651	18907
ENSMUSG00000049164	Zfp518a	chr19:40894705-40917947	+	non-BED genes	No	19.0379	15.3086	10.9165	14.1106	0.819	0.659	0.47	0.607	12.7233	23243
ENSMUSG00000018347	Zkscan6	chr11:65807175-65829239	+	non-BED genes	No	15.6954	18.7172	23.1505	19.8996	0.711	0.848	1.049	0.902	33.2206	22065
ENSMUSG00000027884	Clcc1	chr3:108653913-108678840	+	non-BED genes	No	20.0552	20.3916	19.5274	16.1781	0.805	0.818	0.783	0.649	20.9327	24928
ENSMUSG00000026617	Bpnt1	chr1:185332149-185357777	+	non-BED genes	No	17.1486	19.9132	17.7393	17.9355	0.669	0.777	0.692	0.7	15.5892	25629
ENSMUSG00000030268	Bcat1	chr6:144993835-145076184	-	non-BED genes	No	61.2556	60.2179	64.9815	64.0406	0.744	0.731	0.789	0.778	0.266125	82350
ENSMUSG00000018425	Dhx40	chr11:86768846-86807746	-	non-BED genes	No	21.2178	19.3152	17.0335	20.2614	0.545	0.497	0.438	0.521	6.30268	38901
ENSMUSG00000026516	Nvl	chr1:181093423-181144157	-	non-BED genes	No	32.408	34.7434	29.8792	30.4439	0.639	0.685	0.589	0.6	12.2874	50735
ENSMUSG00000016257	Slmo2	chr2:174465067-174473081	-	non-BED genes	No	7.04839	5.80053	5.97585	4.80692	0.879	0.724	0.746	0.6	37.1927	8015
ENSMUSG00000036550	Cnot1	chr8:95719451-95807462	-	non-BED genes	No	68.6673	78.9949	73.4041	70.4499	0.78	0.898	0.834	0.8	6.59744	88012
ENSMUSG00000062627	Mysm1	chr4:94942040-94979100	-	non-BED genes	No	38.3665	43.6535	48.042	42.7971	1.035	1.178	1.296	1.155	28.8797	37061
ENSMUSG00000029191	Rfc1	chr5:65261852-65335670	-	non-BED genes	No	41.055	38.2715	44.5601	46.622	0.556	0.518	0.604	0.632	3.73913	73819
ENSMUSG00000032582	Rbm6	chr9:107773559-107873237	-	non-BED genes	No	112.12	107.998	91.4258	91.3316	1.125	1.083	0.917	0.916	0.109806	99679
ENSMUSG00000021555	Naa35	chr13:59585259-59634798	+	non-BED genes	No	38.3665	43.7731	46.254	45.795	0.774	0.884	0.934	0.924	21.4101	49540
ENSMUSG00000027981	Rnpc3	chr3:113605067-113630149	-	non-BED genes	No	18.0206	11.8403	15.3396	13.9039	0.718	0.472	0.612	0.554	6.37144	25083
ENSMUSG00000045942	BC049762	chr11:51253651-51263046	-	non-BED genes	No	8.429	5.92013	3.67021	5.06536	0.897	0.63	0.391	0.539	148.461	9396
ENSMUSG00000023988	Bysl	chr17:47599331-47611492	-	non-BED genes	No	13.2975	11.3021	9.31668	10.079	1.093	0.929	0.766	0.829	8.48412	12162
ENSMUSG00000033039	Micall1	chr15:79108972-79136897	+	non-BED genes	No	16.858	20.87	20.4214	18.7625	0.604	0.747	0.731	0.672	1.61993	27926
ENSMUSG00000001380	Hars	chr18:36766530-36783205	-	non-BED genes	No	15.55	16.8634	11.4812	11.7847	0.932	1.011	0.688	0.707	11.8887	16676
ENSMUSG00000030779	Rbbp6	chr7:122965686-123002557	+	non-BED genes	No	33.498	33.9062	40.0899	38.6105	0.908	0.92	1.087	1.047	0	36872
ENSMUSG00000004768	Rab23	chr1:33719882-33742564	+	non-BED genes	No	26.2316	27.5077	23.3387	22.0705	1.156	1.213	1.029	0.973	13.6836	22683
ENSMUSG00000020721	Helz	chr11:107547930-107693826	+	non-BED genes	No	102.529	121.213	149.255	147.361	0.703	0.831	1.023	1.01	9.98949	145897
ENSMUSG00000018841	Rad51d	chr11:82876434-82890614	-	non-BED genes	No	13.8061	14.89	11.0577	11.2162	0.974	1.05	0.78	0.791	19.7119	14181
ENSMUSG00000032018	Sc5d	chr9:42254177-42264300	-	non-BED genes	No	8.50166	9.98648	9.92838	9.25204	0.84	0.986	0.981	0.914	15.6732	10124
ENSMUSG00000025133	Ints4	chr7:97480956-97541397	+	non-BED genes	No	30.2281	27.2685	33.2671	35.7677	0.5	0.451	0.55	0.592	26.4376	60442
ENSMUSG00000024976	Shoc2	chr19:53944306-54033268	+	non-BED genes	No	65.4701	65.54	83.0502	81.4076	0.736	0.737	0.934	0.915	5.20176	88963
ENSMUSG00000011884	Gltp	chr5:114669403-114690984	-	non-BED genes	No	11.0449	10.1659	14.3044	16.54	0.512	0.471	0.663	0.766	6.32796	21582
ENSMUSG00000097217	Gm26549	chr17:32284787-32298689	+	non-BED genes	No	14.0968	10.4051	11.7635	10.4925	1.014	0.748	0.846	0.755	34.6814	13903
ENSMUSG00000031931	Ankrd49	chr9:14780209-14782964	-	non-BED genes	No	1.30795	1.67438	1.36456	2.42931	0.475	0.608	0.495	0.881	1.11022	2756
ENSMUSG00000031134	Rbmx	chrX:57383530-57393036	-	non-BED genes	No	6.53974	5.20254	3.01145	3.6698	0.688	0.547	0.317	0.386	23.9358	9507
ENSMUSG00000036646	Man1b1	chr2:25332338-25352212	+	non-BED genes	No	17.3666	21.4679	12.7516	11.8881	0.874	1.08	0.642	0.598	0.05831	19875
ENSMUSG00000031229	Atrx	chrX:105797615-105929397	-	non-BED genes	Yes	51.5913	54.7164	60.5584	58.8719	0.391	0.415	0.46	0.447	15.1511	131783
ENSMUSG00000026270	Capn10	chr1:92934376-92947941	+	non-BED genes	No	14.8961	16.086	11.0106	10.8543	1.098	1.186	0.812	0.8	2.08562	13566
ENSMUSG00000097565	Gm26965	chr13:67491152-67526151	-	non-BED genes	No	20.4185	19.674	20.939	22.3806	0.583	0.562	0.598	0.639	14.4069	35000
ENSMUSG00000026213	Stk11ip	chr1:75521529-75537335	+	non-BED genes	No	12.5708	12.1991	9.12846	8.63179	0.795	0.772	0.577	0.546	7.93117	15807
ENSMUSG00000028124	Gclm	chr3:122245557-122269984	+	non-BED genes	No	20.1279	23.0825	25.1268	23.0009	0.824	0.945	1.029	0.942	9.52924	24428
ENSMUSG00000048249	Crebrf	chr17:26715650-26776635	+	non-BED genes	No	41.4183	40.7233	56.1353	54.4785	0.679	0.668	0.92	0.893	6.37494	60986
ENSMUSG00000031600	Vps37a	chr8:40511783-40551134	+	non-BED genes	No	34.7333	33.3082	35.5728	34.2687	0.883	0.846	0.904	0.871	2.8209	39352
ENSMUSG00000022914	Brwd1	chr16:95992092-96082526	-	non-BED genes	No	92.065	94.6025	109.871	106.062	1.018	1.046	1.215	1.173	2.46917	90435
ENSMUSG00000042870	Tom1	chr8:75033686-75070121	+	non-BED genes	No	26.8129	31.8132	32.8436	33.4934	0.736	0.873	0.901	0.919	6.69354	36436
ENSMUSG00000037134	Prmt10	chr8:77549397-77581338	+	non-BED genes	No	19.4739	22.0061	31.2438	29.4618	0.61	0.689	0.978	0.922	17.6368	31942
ENSMUSG00000026489	Adck3	chr1:180165238-180199602	-	non-BED genes	No	34.9513	44.0123	40.0899	39.2307	1.017	1.281	1.167	1.142	0.371117	34365
ENSMUSG00000040029	Ipo8	chr6:148770683-148831467	-	non-BED genes	No	37.5672	39.7067	43.8542	46.6737	0.618	0.653	0.721	0.768	4.51648	60785
ENSMUSG00000001366	Fbxo9	chr9:78081499-78109065	-	non-BED genes	No	24.197	24.8167	20.7978	22.6908	0.878	0.9	0.754	0.823	13.2371	27567
ENSMUSG00000091764	Zfp964	chr8:69659263-69664170	+	non-BED genes	No	1.16262	0.83719	1.8351	1.13712	0.237	0.171	0.374	0.232	0.710242	4908
ENSMUSG00000004558	Ndrg2	chr14:51905271-51913488	-	non-BED genes	No	7.26638	7.95331	6.06995	5.78898	0.884	0.968	0.739	0.704	1.7456	8218
ENSMUSG00000041506	Rrp9	chr9:106475963-106485424	+	non-BED genes	No	10.1729	12.797	10.5401	8.63179	1.075	1.352	1.114	0.912	0.261078	9462
ENSMUSG00000039770	Ypel5	chr17:72836704-72851195	+	non-BED genes	No	14.1694	16.5046	19.3392	15.9197	0.978	1.139	1.334	1.099	6.685	14492
ENSMUSG00000047694	Yipf6	chrX:98936316-98949017	+	non-BED genes	No	13.8788	10.6443	5.55236	6.82273	1.093	0.838	0.437	0.537	0.0601484	12702
ENSMUSG00000025969	Nrp2	chr1:62703285-62818695	+	non-BED genes	Yes	149.76	139.213	141.303	144.776	1.298	1.206	1.224	1.254	3.29887	115411
ENSMUSG00000019774	Mtrf1l	chr10:5811887-5823910	-	non-BED genes	No	8.50166	10.2855	10.0695	9.56216	0.707	0.855	0.837	0.795	25.7545	12024
ENSMUSG00000024429	Gnl1	chr17:35979851-35989462	+	non-BED genes	No	10.6816	14.2322	11.4812	9.97566	1.111	1.481	1.194	1.038	1.79512	9612
ENSMUSG00000021036	Sptlc2	chr12:87305058-87388355	-	non-BED genes	No	60.3836	62.5501	67.0518	72.8275	0.725	0.751	0.805	0.874	6.06068	83298
ENSMUSG00000050379	2017-09-06	chrX:36911326-36991794	-	non-BED genes	No	74.989	82.8818	74.0158	69.0026	0.932	1.03	0.92	0.858	0	80469
ENSMUSG00000029500	Pgam5	chr5:110259130-110269913	-	non-BED genes	No	10.5362	11.0629	11.2929	11.3712	0.977	1.026	1.047	1.054	12.1795	10784
ENSMUSG00000062908	Acadm	chr3:153922357-153944632	-	non-BED genes	No	19.4739	22.8433	19.9038	22.2256	0.874	1.025	0.894	0.998	18.1472	22276
ENSMUSG00000063972	Nr6a1	chr2:38723370-38927688	-	non-BED genes	No	96.2795	101.719	122.058	137.592	0.471	0.498	0.597	0.673	0	204319
ENSMUSG00000030868	Dctn5	chr7:122133041-122149044	+	non-BED genes	No	14.2421	15.4282	12.0458	12.1465	0.89	0.964	0.753	0.759	33.0532	16004
ENSMUSG00000034121	Mks1	chr11:87853215-87863803	+	non-BED genes	No	12.5708	8.91009	6.21112	6.25417	1.187	0.841	0.587	0.591	17.903	10589
ENSMUSG00000016427	Ndufa1	chrX:37187588-37191163	-	non-BED genes	No	4.14183	3.40856	3.5761	3.41137	1.158	0.953	1	0.954	16.3	3576
ENSMUSG00000038766	Gabpb2	chr3:95181766-95217916	-	non-BED genes	No	38.0032	41.5605	36.0904	37.1115	1.051	1.15	0.998	1.027	23.894	36151
ENSMUSG00000042148	Cox10	chr11:63962627-64079468	-	non-BED genes	No	58.9303	58.4239	94.4372	91.9001	0.504	0.5	0.808	0.787	13.9453	116842
ENSMUSG00000050312	Nsun3	chr16:62732444-62786818	-	non-BED genes	No	39.9651	39.1087	41.6898	43.0039	0.735	0.719	0.767	0.791	32.1728	54375
ENSMUSG00000028655	Mfsd2a	chr4:122946850-122961188	-	non-BED genes	No	10.1729	15.6674	21.1743	14.9893	0.709	1.093	1.477	1.045	5.0563	14339
ENSMUSG00000000711	Rab5b	chr10:128677193-128696268	-	non-BED genes	No	19.1832	19.6142	18.8216	19.8996	1.006	1.028	0.987	1.043	5.76662	19076
ENSMUSG00000043866	Taf10	chr7:105739393-105744361	-	non-BED genes	No	4.50515	5.32214	6.06995	5.7373	0.907	1.071	1.222	1.155	0.888939	4969
ENSMUSG00000002326	Gmpr2	chr14:55672235-55678750	+	non-BED genes	No	5.15913	6.09953	5.03477	4.34174	0.792	0.936	0.773	0.666	10.2819	6516
ENSMUSG00000019849	Prep	chr10:45067206-45158997	+	non-BED genes	No	54.1345	52.3842	69.5927	71.3286	0.59	0.571	0.758	0.777	2.40431	91792
ENSMUSG00000079197	Psme2	chr14:55587441-55591113	-	non-BED genes	No	3.70585	5.14274	3.01145	2.63606	1.009	1.4	0.82	0.718	1.93568	3673
ENSMUSG00000033319	Fem1c	chr18:46501746-46525971	-	non-BED genes	No	24.4877	26.4911	31.5732	30.754	1.011	1.093	1.303	1.269	26.9258	24226
ENSMUSG00000053286	Trmt1l	chr1:151428648-151458182	+	non-BED genes	No	25.941	26.7303	22.3506	20.2614	0.878	0.905	0.757	0.686	20.3572	29535
ENSMUSG00000003348	Mob3a	chr10:80685256-80701820	-	non-BED genes	No	13.0068	15.6674	10.9165	10.6476	0.785	0.946	0.659	0.643	12.7589	16565
ENSMUSG00000010110	Stx5a	chr19:8741413-8756069	+	non-BED genes	No	16.64	17.7604	13.7868	12.0432	1.135	1.212	0.941	0.822	5.85473	14657
ENSMUSG00000046312	AI464131	chr4:41495604-41503076	-	non-BED genes	No	4.06917	5.26234	8.3756	6.82273	0.545	0.704	1.121	0.913	4.19697	7473
ENSMUSG00000008601	Rab25	chr3:88542029-88548300	-	non-BED genes	No	2.97921	2.57137	3.43494	3.56643	0.475	0.41	0.548	0.569	2.78922	6272
ENSMUSG00000034602	Mon2	chr10:122992061-123076505	-	non-BED genes	No	83.4907	97.9512	94.5784	93.8126	0.989	1.16	1.12	1.111	4.0393	84445
ENSMUSG00000042688	Mapk6	chr9:75369062-75410005	-	non-BED genes	No	35.6779	42.2781	33.6435	33.7002	0.871	1.033	0.822	0.823	7.10859	40944
ENSMUSG00000020290	Xpo1	chr11:23256041-23298249	+	non-BED genes	No	33.934	40.1253	24.8445	24.7582	0.804	0.951	0.589	0.587	2.21966	42209
ENSMUSG00000033526	Ppip5k1	chr2:121310561-121355396	-	non-BED genes	No	38.8751	41.0821	38.9136	36.2328	0.867	0.916	0.868	0.808	1.50401	44836
ENSMUSG00000049658	Bdp1	chr13:100017994-100104070	-	non-BED genes	No	72.3004	81.8652	81.8268	81.6143	0.84	0.951	0.951	0.948	7.69526	86077
ENSMUSG00000035164	Zc3h12c	chr9:52111985-52168111	-	non-BED genes	No	44.5429	44.5505	70.1574	65.3845	0.794	0.794	1.25	1.165	1.71024	56127
ENSMUSG00000071267	Zfp942	chr17:21926960-21962464	-	non-BED genes	No	9.59162	8.5513	14.9631	18.4007	0.27	0.241	0.421	0.518	1.67657	35505
ENSMUSG00000074637	Sox2	chr3:34650005-34652461	+	non-BED genes	No	0.799301	0.83719	1.08224	0.930373	0.325	0.341	0.44	0.379	3.03459	2457
ENSMUSG00000033967	2310014L17Rik	chr7:12927416-12931072	+	non-BED genes	No	4.14183	4.60455	3.99958	3.04955	1.133	1.259	1.094	0.834	2.66357	3657
ENSMUSG00000044641	Pard6b	chr2:168081004-168101203	+	non-BED genes	No	13.7335	17.8202	20.7037	20.3648	0.68	0.882	1.025	1.008	7.84991	20200
ENSMUSG00000021890	Eaf1	chr14:31495079-31509858	+	non-BED genes	No	13.6608	14.89	14.2573	12.5083	0.924	1.007	0.965	0.846	24.8589	14780
ENSMUSG00000053070	9230110C19Rik	chr9:8021672-8042823	-	non-BED genes	No	15.1141	16.6242	15.1043	16.9535	0.715	0.786	0.714	0.802	8.8202	21152
ENSMUSG00000022634	Yaf2	chr15:93284278-93336935	-	non-BED genes	No	38.0032	47.4806	66.6754	62.0248	0.722	0.902	1.266	1.178	1.25431	52658
ENSMUSG00000035234	Fam175a	chr5:100805192-100820965	-	non-BED genes	No	10.9722	13.694	11.2929	11.2678	0.696	0.868	0.716	0.714	9.19738	15774
ENSMUSG00000040412	5330417C22Rik	chr3:108455694-108536536	-	non-BED genes	No	58.2037	64.7028	67.4283	65.1261	0.72	0.8	0.834	0.806	12.3629	80843
ENSMUSG00000031781	Ciapin1	chr8:94819818-94838358	-	non-BED genes	No	23.1797	22.4845	21.2213	21.8638	1.25	1.213	1.145	1.179	43.7571	18541
ENSMUSG00000020283	Pex13	chr11:23646479-23665959	-	non-BED genes	No	20.7092	18.3584	21.833	20.6233	1.063	0.942	1.121	1.059	5.77704	19481
ENSMUSG00000078640	Gm11627	chr11:102576398-102579461	-	non-BED genes	No	1.45328	1.43518	1.69394	1.91243	0.474	0.468	0.553	0.624	1.02404	3064
ENSMUSG00000035561	Aldh1b1	chr4:45799022-45804604	+	non-BED genes	No	6.97572	5.86033	4.56423	4.60018	1.249	1.05	0.818	0.824	30.4864	5583
ENSMUSG00000039987	Phtf2	chr5:20758663-20882124	-	non-BED genes	No	70.7745	81.327	95.7547	94.8463	0.573	0.659	0.776	0.768	80.4624	123462
ENSMUSG00000020834	Dhrs13	chr11:78032280-78037866	+	non-BED genes	No	6.6124	6.45832	4.42307	4.34174	1.184	1.156	0.792	0.777	1.8787	5587
ENSMUSG00000035666	Gtf3c4	chr2:28822299-28840360	-	non-BED genes	No	14.7507	15.2488	21.5507	22.6908	0.817	0.844	1.193	1.256	1.74344	18062
ENSMUSG00000069114	Zbtb10	chr3:9250602-9285333	+	non-BED genes	No	24.7783	28.2851	41.3604	43.9859	0.713	0.814	1.191	1.266	0.903878	34732
ENSMUSG00000023984	Gm20517	chr17:47611589-47683861	+	non-BED genes	No	66.6327	73.9119	66.0166	60.681	0.922	1.023	0.913	0.84	31.4897	72273
ENSMUSG00000041930	Fam222a	chr5:114568016-114613220	+	non-BED genes	No	29.9375	35.2816	59.0997	54.1167	0.662	0.78	1.307	1.197	1.02379	45205
ENSMUSG00000033444	Specc1l	chr10:75212073-75312399	+	non-BED genes	No	91.5563	101.599	104.883	103.788	0.913	1.013	1.045	1.034	4.63588	100327
ENSMUSG00000036257	Pnpla8	chr12:44221370-44312343	+	non-BED genes	No	67.432	61.8325	67.8988	70.8117	0.741	0.68	0.746	0.778	0.0447855	90974
ENSMUSG00000044708	Kcnj10	chr1:172341210-172374085	+	non-BED genes	No	15.8407	21.0494	22.3977	23.7245	0.482	0.64	0.681	0.722	1.69539	32876
ENSMUSG00000025979	Mob4	chr1:55131231-55154899	+	non-BED genes	No	18.9652	16.684	21.2213	20.4165	0.801	0.705	0.897	0.863	5.60024	23669
ENSMUSG00000031538	Plat	chr8:22757744-22782847	+	non-BED genes	No	30.6641	32.0524	27.056	26.9808	1.221	1.277	1.078	1.075	11.7844	25104
ENSMUSG00000021392	Nol8	chr13:49653350-49679015	+	non-BED genes	No	19.4739	17.5212	13.928	16.0231	0.759	0.683	0.543	0.624	29.4725	25666
ENSMUSG00000021418	Rpp40	chr13:35893472-35906359	-	non-BED genes	No	9.30096	6.51812	5.03477	6.09911	0.722	0.506	0.391	0.473	5.92419	12888
ENSMUSG00000034647	Ankrd12	chr17:65967501-66077089	-	non-BED genes	No	73.2451	77.7989	79.8034	81.9245	0.668	0.71	0.728	0.748	6.29929	109589
ENSMUSG00000025532	Crcp	chr5:130029290-130060789	+	non-BED genes	No	32.5534	32.471	27.2442	25.8437	1.033	1.031	0.865	0.82	4.00487	31500
ENSMUSG00000046667	Rbm12b1	chr4:12140264-12146731	+	non-BED genes	No	1.81659	2.21257	3.10556	2.32593	0.281	0.342	0.48	0.36	3.76616	6468
ENSMUSG00000029703	Lrwd1	chr5:136122772-136136074	-	non-BED genes	No	10.1729	12.8568	8.65792	8.9936	0.765	0.966	0.651	0.676	16.4421	13303
ENSMUSG00000075033	Nxpe3	chr16:55839953-55895279	-	non-BED genes	No	42.145	42.5771	41.4545	42.4353	0.762	0.77	0.749	0.767	4.07946	55327
ENSMUSG00000018481	Appbp2	chr11:85187262-85235130	-	non-BED genes	No	45.1242	47.7796	46.4893	43.7275	0.943	0.998	0.971	0.913	25.8286	47869
ENSMUSG00000027774	Gfm1	chr3:67430096-67476529	+	non-BED genes	No	40.5464	44.0123	37.4549	36.9565	0.873	0.948	0.807	0.796	16.9909	46434
ENSMUSG00000052137	Rbm12b2	chr4:12089439-12096243	+	non-BED genes	No	0.871965	0.657792	2.72913	3.41137	0.128	0.097	0.401	0.501	12.448	6805
ENSMUSG00000006711	D130043K22Rik	chr13:24845135-24901270	+	non-BED genes	No	49.3387	54.1782	42.1603	39.9543	0.879	0.965	0.751	0.712	8.51637	56136
ENSMUSG00000024583	Txnl1	chr18:63662801-63692359	-	non-BED genes	No	23.5431	24.5177	24.7504	26.3089	0.796	0.829	0.837	0.89	6.46523	29559
ENSMUSG00000063904	Dpp3	chr19:4907229-4928287	-	non-BED genes	No	24.2697	29.6006	22.8211	21.1401	1.152	1.406	1.084	1.004	8.69242	21059
ENSMUSG00000028688	Toe1	chr4:116794310-116807640	-	non-BED genes	No	13.4428	12.9764	7.2463	10.079	1.008	0.973	0.544	0.756	11.9562	13331
ENSMUSG00000031622	Sin3b	chr8:72723288-72758203	+	non-BED genes	No	34.0066	41.9791	34.8199	33.0282	0.974	1.202	0.997	0.946	15.7051	34916
ENSMUSG00000031171	Ftsj1	chrX:8238668-8252406	-	non-BED genes	No	5.74044	7.89351	3.99958	4.70355	0.418	0.575	0.291	0.342	14.7778	13739
ENSMUSG00000043987	Cep164	chr9:45766946-45828691	-	non-BED genes	No	33.1347	39.8861	47.995	45.4849	0.537	0.646	0.777	0.737	14.7951	61746
ENSMUSG00000005615	Pcyt1a	chr16:32430921-32475070	+	non-BED genes	No	25.8683	24.4579	32.7495	35.1474	0.586	0.554	0.742	0.796	26.8171	44150
ENSMUSG00000048280	Zfp738	chr13:67667437-67687071	-	non-BED genes	No	11.2629	7.77391	7.19925	7.08117	0.574	0.396	0.367	0.361	0.126415	19635
ENSMUSG00000019373	Cops3	chr11:59817795-59839838	-	non-BED genes	No	26.2316	22.7835	21.5507	19.4861	1.19	1.034	0.978	0.884	7.80955	22044
ENSMUSG00000001156	Mxd1	chr6:86647044-86669159	-	non-BED genes	No	22.0898	21.7669	24.3739	20.7266	0.999	0.984	1.102	0.937	6.50428	22116
ENSMUSG00000029672	Fam3c	chr6:22306520-22356243	-	non-BED genes	No	33.1347	29.4213	43.7601	43.6241	0.666	0.592	0.88	0.877	9.98109	49724
ENSMUSG00000034621	Gpatch8	chr11:102475915-102556392	-	non-BED genes	No	90.1031	98.5492	94.4372	89.6259	1.12	1.225	1.173	1.114	20.1197	80478
ENSMUSG00000052539	Magi3	chr3:104013259-104220374	-	non-BED genes	No	132.757	139.392	153.396	159.714	0.641	0.673	0.741	0.771	4.22356	207116
ENSMUSG00000025902	Sox17	chr1:4490928-4496413	-	non-BED genes	No	1.23528	1.13619	2.3527	2.01581	0.225	0.207	0.429	0.367	1.55446	5486
ENSMUSG00000028568	Btf3l4	chr4:108814295-108833614	-	non-BED genes	No	22.9618	25.8333	20.2332	22.3806	1.188	1.337	1.047	1.158	4.92899	19320
ENSMUSG00000027175	Tcp11l1	chr2:104657288-104712169	-	non-BED genes	No	38.2938	47.7796	46.254	37.6284	0.698	0.871	0.843	0.686	0.849496	54882
ENSMUSG00000030699	Tbx6	chr7:126781483-126785560	+	non-BED genes	No	3.26987	5.02314	3.71726	3.30799	0.802	1.232	0.912	0.811	4.14762	4078
ENSMUSG00000026662	Sephs1	chr2:4881564-4910557	+	non-BED genes	No	19.2559	21.0494	29.3616	24.6032	0.664	0.726	1.013	0.849	0.0454586	28994
ENSMUSG00000026659	Dusp12	chr1:170873498-170885540	-	non-BED genes	No	15.986	15.189	12.0458	13.3353	1.327	1.261	1	1.107	6.2865	12043
ENSMUSG00000064120	Mocs1	chr17:49428362-49455435	+	non-BED genes	No	13.9514	16.0262	16.7041	17.9872	0.515	0.592	0.617	0.664	31.3158	27074
ENSMUSG00000062031	Athl1	chr7:140941391-140947664	+	non-BED genes	No	5.15913	5.02314	4.51718	4.54849	0.822	0.801	0.72	0.725	1.18486	6274
ENSMUSG00000021466	Ptch1	chr13:63511533-63565520	-	non-BED genes	No	45.9235	49.6932	53.7826	52.6694	0.851	0.92	0.996	0.976	0.0826508	53988
ENSMUSG00000041560	Gltscr2	chr7:15937838-15946108	-	non-BED genes	No	10.3909	10.1061	7.05809	5.84067	1.256	1.222	0.853	0.706	2.96857	8271
ENSMUSG00000046159	Chrm3	chr13:9877229-9878998	-	non-BED genes	No	1.30795	2.09298	0.894024	1.18881	0.739	1.182	0.505	0.672	0.488075	1770
ENSMUSG00000031167	Rbm3	chrX:8138975-8145880	-	non-BED genes	No	6.46708	5.44174	4.28191	3.6698	0.936	0.788	0.62	0.531	15.3232	6906
ENSMUSG00000091896	Ube2d2a	chr18:35771559-35807172	+	non-BED genes	No	30.3008	32.471	47.2421	43.5724	0.851	0.912	1.327	1.223	1.15332	35614
ENSMUSG00000026972	Arrdc1	chr2:24925352-24935252	-	non-BED genes	No	7.55703	10.1659	7.2463	8.5801	0.763	1.027	0.732	0.867	4.75697	9901
ENSMUSG00000061207	Stk19	chr17:34823993-34836945	-	non-BED genes	No	15.2594	15.6674	13.4104	13.8005	1.178	1.21	1.035	1.065	10.3089	12953
ENSMUSG00000003382	Etv3	chr3:87525407-87540156	+	non-BED genes	No	13.8788	14.1126	11.7164	12.0432	0.941	0.957	0.794	0.816	4.44225	14750
ENSMUSG00000097383	1500026H17Rik	chr10:89686371-89700866	+	non-BED genes	No	13.8788	12.9166	14.3985	15.6613	0.957	0.891	0.993	1.08	18.5287	14496
ENSMUSG00000031709	Tbc1d9	chr8:83165352-83272934	+	non-BED genes	No	107.833	117.924	118.576	112.213	1.002	1.096	1.102	1.043	5.52776	107583
ENSMUSG00000087361	0610043K17Rik	chr4:101353783-101399181	+	non-BED genes	No	59.3663	55.5535	37.0785	38.5588	1.308	1.224	0.817	0.849	0	45399
ENSMUSG00000022822	Abcc5	chr16:20331303-20426394	-	non-BED genes	No	101.584	123.605	110.012	114.229	1.068	1.3	1.157	1.201	13.6926	95092
ENSMUSG00000006010	BC003331	chr1:150361305-150393080	-	non-BED genes	No	30.4461	25.4745	18.3981	21.1401	0.958	0.802	0.579	0.665	9.62533	31776
ENSMUSG00000034724	Cnot6l	chr5:96070333-96164171	-	non-BED genes	No	54.2798	50.052	60.6525	64.2474	0.578	0.533	0.646	0.685	1.1473	93839
ENSMUSG00000041958	Pigs	chr11:78328415-78342782	+	non-BED genes	No	11.2629	11.3021	10.1636	10.3892	0.784	0.787	0.707	0.723	15.7924	14368
ENSMUSG00000003198	Zfp959	chr17:55892184-55898584	+	non-BED genes	No	3.19721	3.10956	3.85842	4.18668	0.499	0.486	0.603	0.654	0.321222	6401
ENSMUSG00000094671	Gm20382	chr5:131486204-131488482	-	non-BED genes	No	2.25258	1.61458	2.58797	2.42931	0.988	0.708	1.136	1.066	1.66555	2279
ENSMUSG00000029283	Cdc7	chr5:106964322-106984432	+	non-BED genes	No	13.7335	13.4548	11.5753	11.2678	0.683	0.669	0.576	0.56	87.0392	20111
ENSMUSG00000038822	Hace1	chr10:45577829-45712345	+	non-BED genes	No	79.1308	80.9084	102.013	97.7925	0.588	0.601	0.758	0.727	31.0971	134517
ENSMUSG00000068250	Amn1	chr6:149157147-149188712	-	non-BED genes	No	20.6365	19.1358	20.4214	21.1401	0.654	0.606	0.647	0.67	24.7444	31566
ENSMUSG00000085054	Gm15834	chr1:58505148-58523230	+	non-BED genes	No	5.95843	5.14274	7.52863	7.59804	0.33	0.284	0.416	0.42	20.4185	18083
ENSMUSG00000025825	Iscu	chr5:113772748-113778288	+	non-BED genes	No	4.43249	5.02314	3.67021	2.79112	0.8	0.907	0.662	0.504	5.25952	5541
ENSMUSG00000097561	4632411P08Rik	chr5:29378699-29390488	+	non-BED genes	No	10.4636	8.1925	6.54049	6.04742	0.887	0.695	0.555	0.513	11.0096	11790
ENSMUSG00000002043	Trappc6a	chr7:19508670-19516145	+	non-BED genes	No	9.51895	9.74728	6.11701	4.75524	1.273	1.304	0.818	0.636	11.4629	7476
ENSMUSG00000001521	Tulp3	chr6:128321140-128355851	-	non-BED genes	No	27.3216	37.6736	42.5838	40.7813	0.787	1.085	1.227	1.175	11.1998	34712
ENSMUSG00000030283	St8sia1	chr6:142821545-142964452	-	non-BED genes	No	109.068	113.379	146.808	142.295	0.763	0.793	1.027	0.996	9.75837	142908
ENSMUSG00000026890	Lhx6	chr2:36081950-36105408	-	non-BED genes	No	8.28367	8.6709	21.3625	21.1918	0.353	0.37	0.911	0.903	2.20459	23459
ENSMUSG00000031378	Abcd1	chrX:73716597-73738534	+	non-BED genes	No	11.1176	10.0463	12.6104	11.8881	0.507	0.458	0.575	0.542	12.6521	21938
ENSMUSG00000021047	Nova1	chr12:46694517-46818775	-	non-BED genes	No	64.1621	61.1149	86.9086	91.3316	0.516	0.492	0.699	0.735	19.6677	124259
ENSMUSG00000025862	Stag2	chrX:42149317-42277185	+	non-BED genes	No	49.7747	46.5238	43.5249	47.7074	0.389	0.364	0.34	0.373	0.409575	127869
ENSMUSG00000050377	Il31ra	chr13:112522810-112580662	-	non-BED genes	No	22.9618	19.1358	27.7148	32.3563	0.397	0.331	0.479	0.559	0	57853
ENSMUSG00000038279	Nop2	chr6:125131883-125144753	+	non-BED genes	No	11.1176	16.6242	10.7283	9.20035	0.864	1.292	0.834	0.715	6.05022	12871
ENSMUSG00000021671	Poc5	chr13:96388294-96415587	+	non-BED genes	No	22.6711	22.3649	23.7622	24.8616	0.831	0.819	0.871	0.911	16.7929	27294
ENSMUSG00000032481	Smarcc1	chr9:110132037-110240178	+	non-BED genes	No	133.483	143.279	105.871	103.737	1.234	1.325	0.979	0.959	20.7104	108142
ENSMUSG00000021782	Dlg5	chr14:24133953-24245920	-	non-BED genes	No	116.771	139.033	135.421	135.059	1.043	1.242	1.209	1.206	19.7797	111968
ENSMUSG00000000560	Gabra2	chr5:70961057-71095849	-	non-BED genes	No	185.656	160.501	138.95	145.138	1.377	1.191	1.031	1.077	7.74815	134793
ENSMUSG00000097213	Gm26745	chr5:123047373-123230871	-	non-BED genes	No	236.666	237.164	168.924	152.323	1.29	1.292	0.921	0.83	0	183499
ENSMUSG00000027715	Ccna2	chr3:36564866-36572150	-	non-BED genes	No	5.08646	3.28896	3.85842	3.92824	0.698	0.451	0.53	0.539	44.7559	7285
ENSMUSG00000018378	Cuedc1	chr11:88098058-88194140	+	non-BED genes	No	65.5427	77.1411	97.8721	93.6058	0.682	0.803	1.019	0.974	0.983451	96083
ENSMUSG00000041058	Wwp1	chr4:19608303-19708993	-	non-BED genes	No	50.792	48.7364	61.1701	64.5058	0.504	0.484	0.608	0.641	12.6848	100691
ENSMUSG00000036905	C1qb	chr4:136880129-136886187	-	non-BED genes	No	1.5986	1.43518	2.25859	2.89449	0.264	0.237	0.373	0.478	0.96809	6059
ENSMUSG00000035237	Lcat	chr8:105939551-105943382	-	non-BED genes	No	1.5986	2.39197	1.31751	1.44725	0.417	0.624	0.344	0.378	9.27383	3832
ENSMUSG00000068823	Csde1	chr3:103020546-103058189	+	non-BED genes	No	34.2973	37.4942	38.5372	39.3341	0.911	0.996	1.024	1.045	8.13721	37644
ENSMUSG00000028709	Mob3c	chr4:115828092-115836185	+	non-BED genes	No	4.50515	6.21913	5.69352	7.95985	0.557	0.768	0.703	0.983	4.07038	8094
ENSMUSG00000021902	Phf7	chr14:31237696-31251218	-	non-BED genes	No	12.4255	10.3453	5.83469	5.78898	0.919	0.765	0.431	0.428	17.8489	13523
ENSMUSG00000093536	Smim17	chr7:6398715-6432093	+	non-BED genes	No	25.723	20.571	26.4914	25.2751	0.771	0.616	0.794	0.757	68.0534	33379
ENSMUSG00000032557	Uba5	chr9:104046599-104063134	-	non-BED genes	No	13.0795	12.6774	13.0339	11.9915	0.791	0.767	0.788	0.725	16.922	16536
ENSMUSG00000015812	Gnrh1	chr14:67745229-67749435	+	non-BED genes	No	1.96192	1.19599	2.02332	2.01581	0.466	0.284	0.481	0.479	0.743887	4207
ENSMUSG00000024644	Cndp2	chr18:84667470-84685633	-	non-BED genes	No	13.5155	14.6508	16.0454	16.7467	0.744	0.807	0.883	0.922	10.0908	18164
ENSMUSG00000024410	3110002H16Rik	chr18:12168717-12189997	+	non-BED genes	No	17.294	19.6142	18.0216	18.8142	0.813	0.922	0.847	0.884	40.337	21281
ENSMUSG00000060376	Bckdha	chr7:25629852-25658761	-	non-BED genes	No	24.1244	27.7469	28.5617	27.3426	0.834	0.96	0.988	0.946	10.9404	28910
ENSMUSG00000001995	Sipa1l2	chr8:125418063-125492710	-	non-BED genes	No	41.273	43.7731	53.9238	58.5101	0.553	0.586	0.722	0.784	1.10942	74648
ENSMUSG00000031200	Mtcp1	chrX:75410444-75416588	-	non-BED genes	No	5.66777	4.54475	5.12888	5.58224	0.922	0.74	0.835	0.908	29.1924	6145
ENSMUSG00000047141	Zfp654	chr16:64780351-64786321	-	non-BED genes	No	4.43249	5.14274	6.58755	7.64973	0.742	0.861	1.103	1.281	2.57268	5971
ENSMUSG00000022757	Tfg	chr16:56690332-56717450	-	non-BED genes	No	20.5638	20.272	22.8682	20.4165	0.758	0.748	0.843	0.753	7.41449	27119
ENSMUSG00000026767	Fam188a	chr2:12347263-12419469	-	non-BED genes	No	51.8093	49.6932	70.5338	69.9847	0.718	0.688	0.977	0.969	13.9327	72207
ENSMUSG00000001768	Rin2	chr2:145784734-145887616	+	non-BED genes	No	94.4629	86.41	97.9192	101.462	0.918	0.84	0.952	0.986	1.3598	102883
ENSMUSG00000040423	Rc3h1	chr1:160906418-160974978	+	non-BED genes	No	55.8784	63.9852	64.6521	69.0543	0.815	0.933	0.943	1.007	4.30988	68561
ENSMUSG00000075376	Rc3h2	chr2:37370069-37422903	-	non-BED genes	No	56.0238	54.8958	55.9471	54.22	1.06	1.039	1.059	1.026	8.83435	52835
ENSMUSG00000026566	Mpzl1	chr1:165592181-165634541	-	non-BED genes	No	24.415	23.6805	28.7029	30.8574	0.576	0.559	0.678	0.728	42.4249	42361
ENSMUSG00000028572	Hook1	chr4:95967240-96025413	+	non-BED genes	No	39.4564	45.8063	43.0543	47.7591	0.678	0.787	0.74	0.821	29.3211	58174
ENSMUSG00000026384	Ptpn4	chr1:119658044-119837613	-	non-BED genes	No	106.961	111.825	120.27	127.513	0.596	0.623	0.67	0.71	5.76239	179570
ENSMUSG00000014426	Map3k4	chr17:12227621-12318660	-	non-BED genes	No	86.6879	96.3367	115.282	114.177	0.952	1.058	1.266	1.254	0.963485	91040
ENSMUSG00000061273	Mmgt1	chrX:56585512-56598069	-	non-BED genes	No	5.30446	6.21913	5.22298	5.27211	0.422	0.495	0.416	0.42	37.968	12558
ENSMUSG00000019948	Actr6	chr10:89711973-89732295	-	non-BED genes	No	17.294	17.7604	18.6334	18.6075	0.851	0.874	0.917	0.916	12.7822	20323
ENSMUSG00000074829	2010315B03Rik	chr9:124292991-124311750	-	non-BED genes	No	6.03109	4.36535	12.9869	10.8027	0.321	0.233	0.692	0.576	3.35528	18760
ENSMUSG00000021835	Bmp4	chr14:46383520-46390669	-	non-BED genes	No	2.3979	2.27237	4.56423	5.58224	0.335	0.318	0.638	0.781	0.219158	7150
ENSMUSG00000041343	Ankrd42	chr7:92581723-92637142	-	non-BED genes	No	27.3216	29.2419	36.3727	37.8868	0.493	0.528	0.656	0.684	5.73376	55420
ENSMUSG00000023307	2017-03-05	chr19:37207543-37222139	+	non-BED genes	No	17.3666	16.5644	17.2688	15.868	1.19	1.135	1.183	1.087	2.30451	14597
ENSMUSG00000073982	Rhog	chr7:102239123-102250123	-	non-BED genes	No	8.93764	10.5845	12.4222	13.4904	0.812	0.962	1.129	1.226	2.29287	11001
ENSMUSG00000027300	Ubox5	chr2:130590002-130630038	-	non-BED genes	No	29.9375	32.9494	29.1264	29.6685	0.748	0.823	0.727	0.741	5.68893	40037
ENSMUSG00000038369	Ncoa6	chr2:155390656-155473894	-	non-BED genes	No	61.3282	60.7561	72.6042	70.3982	0.737	0.73	0.872	0.846	0.236578	83239
ENSMUSG00000022617	Chkb	chr15:89416405-89429908	-	non-BED genes	No	12.6435	11.5413	6.68166	6.5643	0.936	0.855	0.495	0.486	12.4384	13504
ENSMUSG00000042472	Zfp410	chr12:84316859-84343830	+	non-BED genes	No	28.2662	32.5906	27.1972	25.0167	1.048	1.208	1.008	0.928	20.6923	26972
ENSMUSG00000008482	Rnf151	chr17:24715839-24718057	-	non-BED genes	No	1.67127	0.956789	1.2234	1.2405	0.753	0.431	0.551	0.559	3.06227	2219
ENSMUSG00000034292	Traf3ip1	chr1:91494668-91529303	+	non-BED genes	No	20.3459	28.7037	26.5384	29.3067	0.587	0.829	0.766	0.846	8.93729	34636
ENSMUSG00000031788	Kifc3	chr8:95099832-95142540	-	non-BED genes	No	39.6018	49.155	38.9606	39.7993	0.927	1.151	0.912	0.932	13.2509	42709
ENSMUSG00000019823	Mical1	chr10:41476314-41487032	+	non-BED genes	No	12.2802	11.7805	14.3514	12.3533	1.146	1.099	1.339	1.152	9.91774	10719
ENSMUSG00000041777	Cir1	chr2:73283105-73312701	-	non-BED genes	No	20.2732	22.9031	25.315	28.0146	0.685	0.774	0.855	0.947	2.73731	29597
ENSMUSG00000027132	Katnbl1	chr2:112379211-112414240	+	non-BED genes	No	32.626	37.3746	46.3011	44.0376	0.931	1.067	1.322	1.257	19.4286	35030
ENSMUSG00000025981	Coq10b	chr1:55052770-55072701	+	non-BED genes	No	18.9652	21.2885	26.6325	23.0009	0.951	1.068	1.336	1.154	2.27665	19932
ENSMUSG00000033486	Catsper2	chr2:121392631-121413792	-	non-BED genes	No	19.4739	17.4016	12.5634	11.3195	0.92	0.822	0.594	0.535	19.903	21162
ENSMUSG00000027822	Slc33a1	chr3:63933507-63964768	-	non-BED genes	No	26.0136	26.0127	39.0547	35.716	0.832	0.832	1.249	1.142	13.1335	31262
ENSMUSG00000027505	Fam209	chr2:172472520-172474331	+	non-BED genes	No	1.45328	1.31558	2.21153	2.48099	0.802	0.726	1.22	1.369	1.71172	1812
ENSMUSG00000001700	Gramd3	chr18:56432132-56503792	+	non-BED genes	No	22.0171	22.0061	30.538	36.9048	0.307	0.307	0.426	0.515	14.7679	71661
ENSMUSG00000017291	Taok1	chr11:77529162-77607815	-	non-BED genes	No	64.2348	64.942	65.499	64.3508	0.817	0.826	0.833	0.818	1.84714	78654
ENSMUSG00000051956	Rnf133	chr6:23648869-23650305	-	non-BED genes	No	1.74393	1.61458	1.41162	0.878685	1.214	1.124	0.982	0.611	0	1437
ENSMUSG00000074170	Plekhf1	chr7:38220654-38227994	-	non-BED genes	No	2.76122	2.03318	4.51718	4.13499	0.376	0.277	0.615	0.563	1.53531	7341
ENSMUSG00000070280	Slc22a14	chr9:119169455-119365553	-	non-BED genes	No	157.68	158.408	156.69	155.165	0.804	0.808	0.799	0.791	0	196099
ENSMUSG00000018543	1700001P01Rik	chr11:97771481-97775918	-	non-BED genes	No	2.90655	3.58796	1.88216	1.75737	0.655	0.808	0.424	0.396	3.61392	4438
ENSMUSG00000034653	Ythdc2	chr18:44828665-44889720	+	non-BED genes	No	45.0515	42.2781	47.8538	49.3097	0.738	0.692	0.784	0.808	2.64583	61056
ENSMUSG00000061740	Cyp2d22	chr15:82370528-82380260	-	non-BED genes	No	4.2145	4.54475	7.29336	7.95985	0.433	0.467	0.749	0.818	1.06393	9733
ENSMUSG00000026618	Iars2	chr1:185284726-185329396	-	non-BED genes	No	31.3907	38.8695	32.7966	29.255	0.703	0.87	0.734	0.655	10.9691	44671
ENSMUSG00000030882	Dnhd1	chr7:105640562-105721799	+	non-BED genes	No	43.3076	33.4278	40.6546	42.9522	0.533	0.411	0.5	0.529	14.8812	81238
ENSMUSG00000041471	Fam35a	chr14:34237041-34310503	-	non-BED genes	No	24.7783	17.7006	27.2913	32.9248	0.337	0.241	0.371	0.448	253.045	73463
ENSMUSG00000024151	Msh2	chr17:87672330-87723713	+	non-BED genes	No	38.8025	41.4409	42.0662	40.1611	0.755	0.806	0.819	0.782	22.5352	51384
ENSMUSG00000031668	Eif2ak3	chr6:70844515-70905245	+	non-BED genes	No	60.7469	61.4139	55.3354	58.8719	1	1.011	0.911	0.969	5.08629	60731
ENSMUSG00000059839	Zfp874b	chr13:67471514-67484225	-	non-BED genes	No	9.66428	9.98648	11.2459	11.0611	0.76	0.786	0.885	0.87	12.6334	12712
ENSMUSG00000015748	Prpf3	chr3:95830124-95855885	-	non-BED genes	No	13.8788	14.7704	12.187	13.5421	0.539	0.573	0.473	0.526	24.6907	25762
ENSMUSG00000027552	E2f5	chr3:14578671-14606308	+	non-BED genes	No	12.7888	14.2322	15.8572	17.2636	0.463	0.515	0.574	0.625	8.39721	27638
ENSMUSG00000006920	Ezh1	chr11:101191115-101226463	-	non-BED genes	No	33.498	39.2283	30.7733	31.9945	0.948	1.11	0.871	0.905	12.0189	35349
ENSMUSG00000049866	Arl4c	chr1:88673125-88702221	-	non-BED genes	No	22.2351	20.0328	20.5155	20.8817	0.764	0.688	0.705	0.718	2.34684	29097
ENSMUSG00000023979	Guca1b	chr17:47385393-47392967	+	non-BED genes	No	1.5986	1.61458	2.91734	2.94618	0.211	0.213	0.385	0.389	1.33219	7575
ENSMUSG00000049764	Zfp280b	chr10:76032654-76043234	+	non-BED genes	No	8.64699	8.8503	9.41078	9.51047	0.817	0.836	0.889	0.899	3.54165	10581
ENSMUSG00000075415	Fnbp1	chr2:31026206-31142008	-	non-BED genes	No	92.3556	100.044	123.14	123.895	0.798	0.864	1.063	1.07	10.8134	115803
ENSMUSG00000058655	Eif4b	chr15:102073773-102097172	+	non-BED genes	No	22.8891	23.6805	21.833	23.8279	0.978	1.012	0.933	1.018	0.955436	23400
ENSMUSG00000038383	Pigu	chr2:155278243-155357430	-	non-BED genes	No	46.7955	50.1716	48.5596	51.7907	0.591	0.634	0.613	0.654	6.55648	79188
ENSMUSG00000063052	Lrrc40	chr3:158036662-158068478	+	non-BED genes	No	37.2038	33.368	29.9263	31.6844	1.169	1.049	0.941	0.996	20.5942	31817
ENSMUSG00000064061	Dzip3	chr16:48924232-48994165	-	non-BED genes	No	53.4079	49.6334	40.6546	44.0376	0.764	0.71	0.581	0.63	5.09387	69934
ENSMUSG00000027858	Tspan2	chr3:102734529-102772292	+	non-BED genes	No	24.197	23.5011	34.1141	31.3225	0.641	0.622	0.903	0.829	0.795861	37764
ENSMUSG00000055024	Ep300	chr15:81586214-81652077	+	non-BED genes	No	66.124	72.5963	63.9463	63.5755	1.004	1.102	0.971	0.965	19.0524	65864
ENSMUSG00000097729	2310015A10Rik	chr12:80120548-80132844	-	non-BED genes	No	9.73694	11.8403	13.7397	13.8522	0.792	0.963	1.117	1.126	6.41664	12297
ENSMUSG00000035125	Gcfc2	chr6:81923669-81959915	+	non-BED genes	No	26.2316	28.9429	34.5376	30.8057	0.724	0.798	0.953	0.85	13.4998	36247
ENSMUSG00000021918	Nek4	chr14:30951486-30987439	+	non-BED genes	No	21.5085	21.9463	22.1153	20.5716	0.598	0.61	0.615	0.572	24.8037	35954
ENSMUSG00000057069	Ero1lb	chr13:12565883-12609526	+	non-BED genes	No	21.6538	26.6107	30.538	31.8394	0.496	0.61	0.7	0.73	20.0973	43644
ENSMUSG00000042390	Gatad2b	chr3:90341654-90358120	+	non-BED genes	No	11.6262	13.2754	10.2578	8.78685	0.706	0.806	0.623	0.534	2.34417	16467
ENSMUSG00000033854	Kcnk10	chr12:98433994-98577940	-	non-BED genes	No	154.701	158.349	152.972	161.11	1.075	1.1	1.063	1.119	0.654482	143947
ENSMUSG00000030659	Nucb2	chr7:116504369-116540554	+	non-BED genes	No	20.1279	22.7237	25.5032	25.792	0.556	0.628	0.705	0.713	40.1079	36186
ENSMUSG00000042423	Fbrs	chr7:127485221-127491513	+	non-BED genes	No	3.99651	5.38194	3.90547	3.82486	0.635	0.855	0.621	0.608	0.929824	6293
ENSMUSG00000036450	Hif1an	chr19:44562850-44576274	+	non-BED genes	No	8.13834	9.02969	13.1751	12.7668	0.606	0.673	0.981	0.951	7.18214	13425
ENSMUSG00000026455	Klhl12	chr1:134455531-134491018	+	non-BED genes	No	20.3459	22.5443	19.2451	19.6929	0.573	0.635	0.542	0.555	6.89911	35488
ENSMUSG00000090685	Gm9047	chr6:29471437-29473465	+	non-BED genes	No	1.30795	1.49498	1.50573	1.96412	0.645	0.737	0.742	0.968	0.569806	2029
ENSMUSG00000069520	Tmem19	chr10:115340739-115362262	-	non-BED genes	No	12.0622	10.4649	15.1984	14.214	0.56	0.486	0.706	0.66	9.22263	21524
ENSMUSG00000014402	Tsg101	chr7:46888949-46919969	-	non-BED genes	No	21.8718	21.5277	28.3735	26.9808	0.705	0.694	0.915	0.87	11.5144	31021
ENSMUSG00000025403	Shmt2	chr10:127517123-127522444	-	non-BED genes	No	4.43249	4.24575	4.70539	3.20462	0.833	0.798	0.884	0.602	12.7349	5322
ENSMUSG00000002486	Tchp	chr5:114707760-114722327	+	non-BED genes	No	8.86498	8.4317	8.9873	8.83854	0.609	0.579	0.617	0.607	19.2115	14568
ENSMUSG00000024785	Rcl1	chr19:29101375-29143843	+	non-BED genes	No	21.2178	20.5112	31.5732	31.2709	0.5	0.483	0.743	0.736	4.61228	42469
ENSMUSG00000031918	Mtmr2	chr9:13748410-13806481	+	non-BED genes	No	40.1104	41.6203	39.5253	43.6758	0.691	0.717	0.681	0.752	0.0356553	58072
ENSMUSG00000054252	Fgfr3	chr5:33721724-33737068	+	non-BED genes	No	12.7162	14.8302	12.5634	10.906	0.829	0.966	0.819	0.711	4.74638	15345
ENSMUSG00000025008	Tctn3	chr19:40596446-40612233	-	non-BED genes	No	13.4428	13.6342	11.4341	10.8027	0.851	0.864	0.724	0.684	14.8648	15788
ENSMUSG00000030760	Acer3	chr7:98213658-98321208	-	non-BED genes	No	42.145	33.966	45.0777	51.1188	0.392	0.316	0.419	0.475	0.125905	107551
ENSMUSG00000038600	Atp6v0a4	chr6:38048483-38124586	-	non-BED genes	No	55.7331	56.5701	62.5347	63.4721	0.732	0.743	0.822	0.834	4.26505	76104
ENSMUSG00000021468	Sptlc1	chr13:53332716-53377365	-	non-BED genes	No	28.5569	40.9625	37.6902	37.9902	0.64	0.917	0.844	0.851	7.79765	44650
ENSMUSG00000030850	Ate1	chr7:130391526-130519961	-	non-BED genes	No	83.3453	85.3336	104.271	106.631	0.649	0.664	0.812	0.83	0.482336	128436
ENSMUSG00000026918	Brd3	chr2:27445579-27507662	-	non-BED genes	No	46.1415	57.6465	53.9708	52.411	0.743	0.929	0.869	0.844	0.746326	62084
ENSMUSG00000059005	Hnrnpa3	chr2:75659261-75669407	+	non-BED genes	No	8.13834	6.39852	6.16406	6.25417	0.802	0.631	0.607	0.616	0.735204	10147
ENSMUSG00000041598	Cdc42ep4	chr11:113726850-113751881	-	non-BED genes	No	9.01031	14.4714	18.4922	17.5737	0.36	0.578	0.739	0.702	2.33337	25032
ENSMUSG00000020639	Pfn4	chr12:4769295-4778266	+	non-BED genes	No	7.84769	7.17592	6.58755	6.61598	0.875	0.8	0.734	0.737	27.5638	8972
ENSMUSG00000078493	A930039A15Rik	chr1:153905301-153916910	+	non-BED genes	No	6.39441	7.05632	8.3756	9.30373	0.551	0.608	0.721	0.801	1.30143	11610
ENSMUSG00000025134	Alyref	chr11:120592121-120598365	-	non-BED genes	No	3.77852	4.54475	5.92879	5.78898	0.605	0.728	0.949	0.927	8.47142	6245
ENSMUSG00000068921	Dap3	chr3:88920803-88951181	-	non-BED genes	No	35.3146	37.9726	26.9148	30.909	1.162	1.25	0.886	1.017	0.474932	30379
ENSMUSG00000029227	Fip1l1	chr5:74535449-74598790	+	non-BED genes	No	52.3906	51.846	55.9001	61.4046	0.827	0.819	0.883	0.969	8.74157	63342
ENSMUSG00000024800	Rpp30	chr19:36083716-36104772	+	non-BED genes	No	12.5708	13.0362	14.0221	15.868	0.597	0.619	0.666	0.754	27.8923	21057
ENSMUSG00000078302	Foxd1	chr13:98354245-98356705	+	non-BED genes	No	0.0726638	0.239197	0.941078	0.568561	0.03	0.097	0.382	0.231	7.48043	2461
ENSMUSG00000059920	4930453N24Rik	chr16:64751751-64771161	-	non-BED genes	No	16.64	13.8136	14.2573	15.3511	0.857	0.712	0.734	0.791	10.3317	19411
ENSMUSG00000027184	Caprin1	chr2:103762941-103797649	-	non-BED genes	No	32.5534	31.5142	29.5969	29.3584	0.938	0.908	0.853	0.846	2.69497	34709
ENSMUSG00000041000	Trim62	chr4:128883580-128911328	+	non-BED genes	No	16.2767	24.9961	26.6796	24.8616	0.587	0.901	0.961	0.896	20.715	27749
ENSMUSG00000044617	Zbtb39	chr10:127739538-127747335	+	non-BED genes	No	3.70585	4.06635	7.38746	7.49467	0.475	0.521	0.947	0.961	9.05432	7798
ENSMUSG00000030824	Nucb1	chr7:45492874-45510406	-	non-BED genes	No	14.8961	16.1458	13.5515	12.405	0.85	0.921	0.773	0.708	6.40803	17533
ENSMUSG00000020329	Polrmt	chr10:79736123-79746581	-	non-BED genes	No	8.429	11.0629	8.32854	7.02948	0.806	1.058	0.796	0.672	11.011	10459
ENSMUSG00000028668	Tceb3	chr4:136003368-136021763	-	non-BED genes	No	9.95494	11.0629	11.2929	9.87229	0.541	0.601	0.614	0.537	13.0631	18396
ENSMUSG00000027598	Itch	chr2:155133509-155226855	+	non-BED genes	No	58.4943	62.3707	64.7932	69.0026	0.627	0.668	0.694	0.739	18.3418	93347
ENSMUSG00000034957	Cebpa	chr7:35119293-35121926	+	non-BED genes	No	2.54323	3.76736	2.4468	2.27424	0.966	1.43	0.929	0.863	6.99522	2634
ENSMUSG00000001962	Fam50a	chrX:74313033-74320149	+	non-BED genes	No	6.53974	6.69752	4.32896	3.61812	0.919	0.941	0.608	0.508	3.39889	7117
ENSMUSG00000032050	Rdx	chr9:52047150-52088737	+	non-BED genes	No	23.0344	21.6473	27.0089	31.4259	0.554	0.521	0.649	0.756	0	41588
ENSMUSG00000034269	Setd5	chr6:113077365-113153435	+	non-BED genes	No	98.7501	90.2371	94.3431	92.5204	1.298	1.186	1.24	1.216	2.27909	76071
ENSMUSG00000019796	Lrp11	chr10:7589800-7625483	+	non-BED genes	No	38.6571	47.8394	40.4664	38.4554	1.083	1.341	1.134	1.078	2.20041	35684
ENSMUSG00000018381	Abi3	chr11:95830074-95842476	-	non-BED genes	No	6.46708	8.6111	14.5397	14.7826	0.521	0.694	1.172	1.192	0	12403
ENSMUSG00000026775	Yme1l1	chr2:23156369-23199260	+	non-BED genes	No	34.6606	30.5574	34.7728	33.4934	0.808	0.712	0.811	0.781	6.58942	42892
ENSMUSG00000042659	Arrdc4	chr7:68737045-68749241	-	non-BED genes	No	11.8442	11.0031	12.6575	13.4387	0.971	0.902	1.038	1.102	2.29328	12197
ENSMUSG00000017417	Plxdc1	chr11:97923238-97986444	-	non-BED genes	No	72.5184	76.9617	60.5113	58.7168	1.147	1.218	0.957	0.929	0.412948	63207
ENSMUSG00000023348	Trip6	chr5:137309899-137314241	-	non-BED genes	No	3.85118	4.18595	2.63502	3.15293	0.887	0.964	0.607	0.726	4.56213	4343
ENSMUSG00000016624	Phf21b	chr15:84785381-84856049	-	non-BED genes	No	49.266	54.8958	58.8644	59.027	0.697	0.777	0.833	0.835	1.99797	70669
ENSMUSG00000024150	Mcfd2	chr17:87254658-87265935	-	non-BED genes	No	9.95494	9.44829	9.599	8.68348	0.883	0.838	0.851	0.77	8.43149	11278
ENSMUSG00000096687	AA474331	chr10:39890018-39899238	-	non-BED genes	No	10.6816	9.44829	8.65792	7.44298	1.158	1.025	0.939	0.807	3.50738	9221
ENSMUSG00000025068	Gsto1	chr19:47854970-47864790	+	non-BED genes	No	8.86498	9.92668	7.19925	8.83854	0.903	1.011	0.733	0.9	41.1304	9821
ENSMUSG00000024241	Sos1	chr17:80393752-80480453	-	non-BED genes	No	86.6879	91.0743	91.7081	94.8463	1	1.05	1.058	1.094	5.93993	86702
ENSMUSG00000039100	2017-03-06	chr15:31455899-31531037	-	non-BED genes	No	76.1516	86.7688	86.391	77.5827	1.013	1.155	1.15	1.033	3.62961	75139
ENSMUSG00000021661	Ankra2	chr13:98263158-98274750	+	non-BED genes	No	10.8996	10.0463	8.23444	9.20035	0.94	0.867	0.71	0.794	14.1752	11593
ENSMUSG00000022964	Tmem50b	chr16:91574503-91597800	-	non-BED genes	No	18.2386	19.674	25.5503	25.4302	0.783	0.844	1.097	1.092	13.3097	23298
ENSMUSG00000038570	Fam154b	chr7:82632960-82648528	-	non-BED genes	No	8.86498	6.21913	9.12846	10.4925	0.569	0.399	0.586	0.674	12.7545	15569
ENSMUSG00000019978	Epb4.1l2	chr10:25359798-25523519	+	non-BED genes	No	115.317	123.306	137.727	155.372	0.704	0.753	0.841	0.949	12.5572	163722
ENSMUSG00000017686	Rhot1	chr11:80209019-80267907	+	non-BED genes	No	45.9962	46.7032	52.5122	48.1209	0.781	0.793	0.892	0.817	11.591	58889
ENSMUSG00000012422	Tmem167	chr13:90089123-90143907	+	non-BED genes	No	37.6398	26.3715	39.5253	39.3858	0.687	0.481	0.721	0.719	0.676107	54785
ENSMUSG00000015944	Gatsl2	chr5:134099711-134144343	+	non-BED genes	No	33.062	40.0057	39.243	36.0261	0.741	0.896	0.879	0.807	7.12738	44633
ENSMUSG00000042662	Dusp15	chr2:152940997-152951698	-	non-BED genes	No	10.8269	14.591	14.5397	12.56	1.012	1.363	1.359	1.174	9.44178	10702
ENSMUSG00000000339	Rtca	chr3:116488963-116508208	-	non-BED genes	No	15.0414	17.4614	13.8809	14.4208	0.782	0.907	0.721	0.749	6.40253	19246
ENSMUSG00000005625	Psmd4	chr3:95032694-95042614	-	non-BED genes	No	10.2456	10.9433	8.32854	8.32167	1.033	1.103	0.839	0.839	15.3971	9921
ENSMUSG00000024231	Cul2	chr18:3382988-3436377	+	non-BED genes	No	42.8716	43.4143	39.3841	39.024	0.803	0.813	0.738	0.731	1.60389	53390
ENSMUSG00000020459	Mtif2	chr11:29526408-29545279	+	non-BED genes	No	19.4739	17.282	15.9983	15.9714	1.032	0.916	0.848	0.846	5.47792	18872
ENSMUSG00000013878	Rnf170	chr8:26119368-26143871	+	non-BED genes	No	19.3286	18.3584	16.4689	16.9018	0.789	0.749	0.672	0.69	44.4849	24504
ENSMUSG00000019782	Rwdd1	chr10:33996555-34019624	-	non-BED genes	No	21.2905	21.7071	27.3383	26.6707	0.923	0.941	1.185	1.156	24.165	23070
ENSMUSG00000039830	Olig2	chr16:91225550-91228677	+	non-BED genes	No	0.799301	0.657792	2.30564	2.11918	0.256	0.21	0.737	0.677	0.798456	3128
ENSMUSG00000041966	Dcaf17	chr2:71055328-71099142	+	non-BED genes	No	28.4115	25.7137	20.1861	22.3806	0.648	0.587	0.461	0.511	0	43815
ENSMUSG00000021843	Ktn1	chr14:47663756-47736563	+	non-BED genes	No	69.9025	66.2576	70.0633	72.1556	0.96	0.91	0.962	0.991	1.26706	72808
ENSMUSG00000019297	Nop9	chr14:55745693-55755500	+	non-BED genes	No	7.48437	5.62113	8.18738	8.11492	0.763	0.573	0.835	0.827	6.02462	9808
ENSMUSG00000005267	Zfp287	chr11:62700356-62731905	-	non-BED genes	No	18.9652	20.272	18.4451	19.2794	0.601	0.643	0.585	0.611	23.326	31550
ENSMUSG00000097042	Gm17491	chr8:22480291-22483330	+	non-BED genes	No	1.38061	1.49498	1.8351	2.22256	0.454	0.492	0.604	0.731	0.439018	3040
ENSMUSG00000041891	Lman1	chr18:65980754-66022580	-	non-BED genes	No	24.4877	23.5011	22.5388	23.9829	0.585	0.562	0.539	0.573	0.309003	41827
ENSMUSG00000032531	Amotl2	chr9:102716672-102733418	+	non-BED genes	No	14.6781	15.6674	14.3044	13.9556	0.876	0.936	0.854	0.833	0	16747
ENSMUSG00000032423	Syncrip	chr9:88449729-88482574	-	non-BED genes	No	23.6157	26.9097	29.3146	30.1854	0.719	0.819	0.892	0.919	1.90471	32846
ENSMUSG00000036661	Dennd3	chr15:73512560-73572242	+	non-BED genes	No	68.6673	71.52	59.8526	57.7865	1.151	1.198	1.003	0.968	5.21275	59683
ENSMUSG00000040740	Slc25a34	chr4:141618824-141623821	-	non-BED genes	No	2.32524	2.81057	1.74099	2.17087	0.465	0.562	0.348	0.434	3.95472	4998
ENSMUSG00000041040	Fam117b	chr1:59913006-59985346	+	non-BED genes	No	65.2521	69.726	90.2494	86.8865	0.902	0.964	1.248	1.201	8.78964	72341
ENSMUSG00000050295	Foxc1	chr13:31806646-31810635	+	non-BED genes	No	1.23528	1.79398	2.07037	1.654	0.31	0.45	0.519	0.415	5.17002	3990
ENSMUSG00000031917	Nip7	chr8:107056877-107060926	+	non-BED genes	No	3.99651	5.14274	3.5761	4.9103	0.987	1.27	0.883	1.212	18.5285	4050
ENSMUSG00000071302	2610044O15Rik8	chr8:129217724-129221950	-	non-BED genes	No	0.944629	0.538194	0.894024	0.723623	0.223	0.127	0.212	0.171	0.605576	4227
ENSMUSG00000029634	Rnf6	chr5:146209192-146221555	-	non-BED genes	No	8.79232	9.38849	7.62273	8.47673	0.711	0.759	0.617	0.686	14.8652	12364
ENSMUSG00000021508	Cxcl14	chr13:56288647-56296551	-	non-BED genes	No	4.2145	4.72414	3.5761	5.27211	0.533	0.598	0.452	0.667	1.26723	7905
ENSMUSG00000052446	Zfp961	chr8:71951038-71993408	+	non-BED genes	No	30.1555	28.0459	26.7737	28.0146	0.712	0.662	0.632	0.661	3.72169	42371
ENSMUSG00000021973	Micu2	chr14:57916280-57999262	-	non-BED genes	No	58.0584	64.4038	83.9912	85.6976	0.7	0.776	1.012	1.033	12.6396	82983
ENSMUSG00000003810	Mast2	chr4:116306762-116464183	-	non-BED genes	No	142.203	138.376	124.458	130.304	0.903	0.879	0.791	0.828	1.97816	157422
ENSMUSG00000021482	Aaed1	chr13:64291836-64312710	-	non-BED genes	No	13.1521	16.9232	15.6219	16.2815	0.63	0.811	0.748	0.78	6.59938	20875
ENSMUSG00000037784	Dzip1l	chr9:99629496-99669256	+	non-BED genes	No	32.3354	33.9062	30.4909	30.6506	0.813	0.853	0.767	0.771	9.07284	39761
ENSMUSG00000021245	Mlh3	chr12:85234529-85270591	-	non-BED genes	No	22.1624	22.6041	25.4562	26.1021	0.615	0.627	0.706	0.724	52.2691	36063
ENSMUSG00000020434	4921536K21Rik	chr11:3886088-3895098	-	non-BED genes	No	10.7542	11.1825	9.41078	8.47673	1.193	1.241	1.044	0.941	7.99897	9011
ENSMUSG00000053453	Thoc7	chr14:13949014-13961225	-	non-BED genes	No	11.1176	11.5413	9.69311	10.2858	0.91	0.945	0.794	0.842	4.99633	12212
ENSMUSG00000020828	Pld2	chr11:70540064-70558110	+	non-BED genes	No	6.68507	10.3453	12.8928	12.56	0.37	0.573	0.714	0.696	6.57145	18047
ENSMUSG00000004535	Tax1bp1	chr6:52713729-52766780	+	non-BED genes	No	47.9581	50.4108	59.6173	57.8382	0.904	0.95	1.124	1.09	6.05001	53052
ENSMUSG00000029784	Ssmem1	chr6:30509849-30520254	+	non-BED genes	No	11.6989	10.7639	5.45825	6.09911	1.124	1.034	0.525	0.586	130.943	10406
ENSMUSG00000025035	Arl3	chr19:46531109-46573085	-	non-BED genes	No	32.626	42.5173	32.5613	31.0124	0.777	1.013	0.776	0.739	5.82975	41977
ENSMUSG00000046201	Scaf8	chr17:3114972-3198855	+	non-BED genes	No	65.7607	69.9652	96.1311	92.0552	0.784	0.834	1.146	1.097	1.11673	83884
ENSMUSG00000028245	Nsmaf	chr4:6396207-6454271	-	non-BED genes	No	52.1726	51.547	51.8064	54.9437	0.899	0.888	0.892	0.946	3.50961	58065
ENSMUSG00000026851	BC005624	chr2:30972833-30982201	-	non-BED genes	No	7.12105	7.77391	5.50531	5.16874	0.76	0.83	0.588	0.552	1.04504	9369
ENSMUSG00000007613	Tgfbr1	chr4:47353222-47414931	+	non-BED genes	No	24.633	23.7403	28.6558	36.2845	0.399	0.385	0.464	0.588	1.27684	61710
ENSMUSG00000029209	Gnpda2	chr5:69573108-69592337	-	non-BED genes	No	23.5431	20.2122	15.5278	18.5041	1.224	1.051	0.807	0.962	103.358	19230
ENSMUSG00000003161	Sri	chr5:8046078-8069379	+	non-BED genes	No	26.7403	25.1157	23.574	24.2931	1.148	1.078	1.012	1.043	0	23302
ENSMUSG00000006342	Susd2	chr10:75636619-75644008	-	non-BED genes	No	8.06568	10.7639	7.43452	6.82273	1.091	1.457	1.006	0.923	13.9535	7390
ENSMUSG00000030509	Asb7	chr7:66644565-66689596	-	non-BED genes	No	32.1174	34.6238	48.042	48.7929	0.713	0.769	1.067	1.084	6.58909	45032
ENSMUSG00000024580	Grpel2	chr18:61712440-61726331	-	non-BED genes	No	14.9687	14.9498	14.1162	13.8005	1.078	1.076	1.016	0.993	7.78413	13892
ENSMUSG00000023980	Taf8	chr17:47488050-47502287	-	non-BED genes	No	12.4982	10.4649	9.26962	8.42504	0.878	0.735	0.651	0.592	11.1699	14238
ENSMUSG00000033577	Myo6	chr9:80165031-80311729	+	non-BED genes	No	63.2901	64.344	88.7907	102.599	0.431	0.439	0.605	0.699	81.174	146699
ENSMUSG00000036513	Commd2	chr3:57642904-57651715	-	non-BED genes	No	8.21101	8.4317	5.03477	5.84067	0.932	0.957	0.571	0.663	4.02892	8812
ENSMUSG00000028402	Mpdz	chr4:81278500-81442815	-	non-BED genes	No	107.833	107.16	116.27	127.461	0.656	0.652	0.708	0.776	0.822048	164316
ENSMUSG00000030269	Mtmr14	chr6:113237843-113281387	+	non-BED genes	No	36.1866	42.5173	39.8076	39.6959	0.831	0.976	0.914	0.912	15.997	43545
ENSMUSG00000063234	Gpr84	chr15:103308236-103310438	-	non-BED genes	No	2.76122	2.69097	2.49386	2.58437	1.253	1.222	1.132	1.173	2.87107	2203
ENSMUSG00000022781	Pak2	chr16:32016290-32079342	-	non-BED genes	No	40.9097	43.8927	56.1353	56.0808	0.649	0.696	0.89	0.889	2.4925	63053
ENSMUSG00000071072	Ptges3	chr10:128058954-128077272	+	non-BED genes	No	17.4393	17.4016	20.1861	17.5737	0.952	0.95	1.102	0.959	1.20687	18319
ENSMUSG00000032392	Parp16	chr9:65214690-65239219	+	non-BED genes	No	22.0898	22.9629	21.3154	23.1559	0.901	0.936	0.869	0.944	0.381992	24530
ENSMUSG00000051331	Cacna1c	chr6:118592319-118780324	-	non-BED genes	Yes	196.41	223.47	200.591	195.378	1.045	1.189	1.067	1.039	0.908731	188006
ENSMUSG00000035529	Prdm4	chr10:85891970-85916945	-	non-BED genes	No	19.9099	19.2554	18.8216	22.3806	0.797	0.771	0.754	0.896	9.83708	24976
ENSMUSG00000045034	Ankrd34b	chr13:92425896-92441658	+	non-BED genes	No	12.4255	13.395	11.34	13.5938	0.788	0.85	0.719	0.862	25.0635	15763
ENSMUSG00000048970	C1galt1c1	chrX:38630785-38635087	-	non-BED genes	No	6.90306	3.16936	2.54091	2.11918	1.604	0.737	0.59	0.492	3.19866	4303
ENSMUSG00000038416	Cdc16	chr8:13757676-13781938	+	non-BED genes	No	22.6711	23.9197	16.7982	17.1085	0.934	0.986	0.692	0.705	3.99854	24263
ENSMUSG00000034006	Pqlc1	chr18:80253292-80292725	+	non-BED genes	No	37.2765	39.8861	43.2425	46.3119	0.945	1.011	1.097	1.174	0	39434
ENSMUSG00000054942	Fam73a	chr3:152273459-152340407	-	non-BED genes	No	52.3906	66.3772	67.6635	67.452	0.783	0.991	1.011	1.008	3.12381	66949
ENSMUSG00000028789	Adc	chr4:128930233-128962442	-	non-BED genes	No	26.0863	33.5474	32.0908	30.1854	0.81	1.042	0.996	0.937	3.22834	32210
ENSMUSG00000024474	Ik	chr18:36744656-36757639	+	non-BED genes	No	11.4809	10.5247	8.70497	7.13286	0.884	0.811	0.67	0.549	9.50344	12984
ENSMUSG00000022136	Dnajc3	chr14:118937932-118981702	+	non-BED genes	No	41.491	47.4208	45.1247	46.9321	0.948	1.083	1.031	1.072	46.3575	43771
ENSMUSG00000045411	2410002F23Rik	chr7:44246722-44262720	+	non-BED genes	No	14.0968	15.0694	12.1399	11.1645	0.881	0.942	0.759	0.698	13.5074	15999
ENSMUSG00000053565	Eif3k	chr7:28971373-28981814	-	non-BED genes	No	13.5155	11.4217	7.29336	6.40923	1.294	1.094	0.698	0.614	6.3076	10442
ENSMUSG00000057396	Zfp759	chr13:67128228-67141787	+	non-BED genes	No	5.74044	5.92013	5.74058	7.70142	0.423	0.437	0.423	0.568	24.2432	13560
ENSMUSG00000059939	9430015G10Rik	chr4:156109982-156127265	+	non-BED genes	No	11.5535	11.7207	11.6694	11.9398	0.668	0.678	0.675	0.691	16.5363	17284
ENSMUSG00000055485	Soga1	chr2:157015799-157079254	-	non-BED genes	No	34.37	38.8695	64.7932	67.6588	0.542	0.613	1.021	1.066	3.04815	63456
ENSMUSG00000021756	Il6st	chr13:112464070-112510086	+	non-BED genes	No	18.9652	18.179	27.6206	31.0124	0.412	0.395	0.6	0.674	20.0979	46017
ENSMUSG00000040359	Ufl1	chr4:25248600-25281821	-	non-BED genes	No	27.4669	25.5343	21.833	22.7941	0.827	0.769	0.657	0.686	16.3602	33222
ENSMUSG00000027185	Nat10	chr2:103721256-103761270	-	non-BED genes	No	28.5569	32.2318	31.0085	32.6664	0.714	0.805	0.775	0.816	66.158	40015
ENSMUSG00000029101	Rgs12	chr5:34949445-35039644	+	non-BED genes	No	89.0858	91.8517	98.4838	100.532	0.988	1.018	1.092	1.115	3.11053	90200
ENSMUSG00000007815	Rhoa	chr9:108306205-108337939	+	non-BED genes	No	25.7956	25.7137	34.02	34.6822	0.813	0.81	1.072	1.093	5.57339	31735
ENSMUSG00000049482	Ctu2	chr8:122476143-122484138	+	non-BED genes	No	5.66777	5.02314	5.97585	5.78898	0.709	0.628	0.747	0.724	2.45759	7996
ENSMUSG00000020063	Sirt1	chr10:63319005-63381704	-	non-BED genes	No	48.3214	51.1284	53.0298	50.9637	0.771	0.815	0.846	0.813	1.1484	62700
ENSMUSG00000019734	Tmc4	chr7:3665790-3677524	-	non-BED genes	No	9.88227	11.1227	5.64647	5.84067	0.842	0.948	0.481	0.498	3.51337	11735
ENSMUSG00000027698	Nceh1	chr3:27182965-27284608	+	non-BED genes	No	97.6601	105.665	95.5194	96.1385	0.961	1.04	0.94	0.946	37.3455	101644
ENSMUSG00000034636	Zyg11b	chr4:108229724-108301096	-	non-BED genes	No	65.6154	68.53	61.3113	63.0069	0.919	0.96	0.859	0.883	8.93676	71373
ENSMUSG00000032607	Amt	chr9:108296853-108301571	+	non-BED genes	No	5.15913	5.68093	3.62315	4.85861	1.093	1.204	0.768	1.03	6.37369	4719
ENSMUSG00000024539	Ptpn2	chr18:67665511-67724595	-	non-BED genes	No	70.3385	73.6727	75.2392	71.3286	1.19	1.247	1.273	1.207	26.249	59085
ENSMUSG00000062432	Cyp26c1	chr19:37685581-37693398	+	non-BED genes	No	4.65048	4.36535	6.49344	7.59804	0.595	0.558	0.831	0.972	1.06669	7818
ENSMUSG00000039988	Ankrd13c	chr3:157947414-158006833	+	non-BED genes	No	36.5499	36.358	47.5715	44.5028	0.615	0.612	0.801	0.749	0.470563	59420
ENSMUSG00000028954	Nub1	chr5:24685815-24710555	+	non-BED genes	No	22.0171	20.9298	22.5859	20.5199	0.89	0.846	0.913	0.829	1.84159	24741
ENSMUSG00000033983	Coil	chr11:88970252-88991613	+	non-BED genes	No	14.5328	14.9498	14.0221	12.405	0.68	0.7	0.656	0.581	0	21362
ENSMUSG00000058392	Rrp1b	chr17:32036100-32062865	+	non-BED genes	No	18.2386	18.2986	22.3977	22.0188	0.681	0.684	0.837	0.823	0.159367	26766
ENSMUSG00000094439	Gm21969	chr4:139603186-139662691	+	non-BED genes	No	54.7885	60.0385	53.6415	51.0154	0.921	1.009	0.901	0.857	2.81639	59506
ENSMUSG00000024120	Lrpprc	chr17:84705247-84790789	-	non-BED genes	No	55.0791	55.9721	70.0162	75.1017	0.644	0.654	0.818	0.878	2.14859	85543
ENSMUSG00000008226	Scrn3	chr2:73312601-73337818	+	non-BED genes	No	18.0206	16.3252	12.9398	15.868	0.715	0.647	0.513	0.629	23.9402	25218
ENSMUSG00000020817	Rabep1	chr11:70844778-70943105	+	non-BED genes	No	119.75	129.465	127.987	126.065	1.218	1.317	1.302	1.282	5.0177	98328
ENSMUSG00000021188	Trip11	chr12:101834043-101913267	-	non-BED genes	No	66.56	69.6662	70.8632	71.3286	0.84	0.879	0.894	0.9	27.2596	79225
ENSMUSG00000015932	Dstn	chr2:143915320-143943324	+	non-BED genes	No	28.9202	27.7469	31.5261	32.2012	1.033	0.991	1.126	1.15	4.56624	28005
ENSMUSG00000041920	Slc16a6	chr11:109450855-109473598	-	non-BED genes	No	16.7127	20.571	18.7275	17.6771	0.735	0.904	0.823	0.777	3.00877	22744
ENSMUSG00000026048	Ercc5	chr1:44147847-44181260	+	non-BED genes	No	21.6538	19.674	20.2802	21.8121	0.648	0.589	0.607	0.653	10.2255	33414
ENSMUSG00000022684	Bfar	chr16:13671858-13703612	+	non-BED genes	No	21.7265	19.7338	23.2446	24.7582	0.684	0.621	0.732	0.78	17.9738	31755
ENSMUSG00000025656	Arhgef9	chrX:95048935-95196821	-	non-BED genes	Yes	185.511	176.408	144.032	137.023	1.254	1.193	0.974	0.927	0.806275	147887
ENSMUSG00000025377	Enthd2	chr11:120090531-120098731	-	non-BED genes	No	9.15563	11.0629	7.66979	5.78898	1.116	1.349	0.935	0.706	6.84317	8201
ENSMUSG00000040410	Fbxl4	chr4:22357543-22434091	+	non-BED genes	No	63.1448	58.7229	63.4287	64.8676	0.825	0.767	0.829	0.847	22.581	76549
ENSMUSG00000060477	Irak2	chr6:113638467-113695009	+	non-BED genes	No	40.3284	41.7399	42.9132	40.833	0.713	0.738	0.759	0.722	9.67049	56543
ENSMUSG00000031953	Tmem170	chr8:111864898-111876675	-	non-BED genes	No	5.66777	7.35531	8.23444	8.01154	0.481	0.624	0.699	0.68	44.8383	11778
ENSMUSG00000022698	Naa50	chr16:44139830-44163366	+	non-BED genes	No	16.0587	13.5146	15.5748	18.1423	0.682	0.574	0.662	0.771	5.65504	23537
ENSMUSG00000032611	1700102P08Rik	chr9:108392834-108397763	+	non-BED genes	No	4.35983	4.66434	2.54091	3.35968	0.884	0.946	0.515	0.681	2.28441	4930
ENSMUSG00000040124	Gorab	chr1:163384909-163403641	-	non-BED genes	No	14.3874	12.7372	15.1984	15.4545	0.768	0.68	0.811	0.825	57.7784	18733
ENSMUSG00000020079	Supv3l1	chr10:62429209-62449738	-	non-BED genes	No	21.1452	17.9398	13.128	12.9218	1.03	0.874	0.639	0.629	2.91852	20530
ENSMUSG00000003235	Eif2b5	chr16:20498817-20509955	+	non-BED genes	No	13.2975	15.5478	12.3752	11.4746	1.194	1.396	1.111	1.03	0.497383	11139
ENSMUSG00000032766	Gng11	chr6:4003943-4008445	+	non-BED genes	No	1.23528	1.25579	1.97626	2.11918	0.274	0.279	0.439	0.471	1.35917	4503
ENSMUSG00000084904	Gm14827	chrX:94442732-94447727	+	non-BED genes	No	0.871965	1.31558	0.329377	0.361812	0.175	0.263	0.066	0.072	2.77235	4996
ENSMUSG00000020707	Rnf135	chr11:80183851-80199757	+	non-BED genes	No	8.50166	7.35531	6.96398	7.59804	0.534	0.462	0.438	0.478	54.2876	15907
ENSMUSG00000053291	Rab4b	chr7:27168424-27178896	-	non-BED genes	No	12.8615	13.5744	7.2463	5.89236	1.228	1.296	0.692	0.563	7.79367	10473
ENSMUSG00000028013	Ppa2	chr3:133310110-133378235	+	non-BED genes	No	44.6882	44.1917	51.7123	52.566	0.656	0.649	0.759	0.772	8.69898	68126
ENSMUSG00000096983	2010015M23Rik	chr11:88039578-88047360	-	non-BED genes	No	8.28367	6.27893	5.50531	3.56643	1.064	0.807	0.707	0.458	16.0792	7783
ENSMUSG00000063019	Manbal	chr2:157367594-157396763	+	non-BED genes	No	27.3942	35.2218	34.6317	31.1675	0.939	1.207	1.187	1.068	9.97699	29170
ENSMUSG00000029144	Gtf3c2	chr5:31151142-31180144	-	non-BED genes	No	33.6433	31.6936	22.5859	21.0884	1.16	1.093	0.779	0.727	6.19453	29003
ENSMUSG00000024726	2410127L17Rik	chr19:18670780-18704788	+	non-BED genes	No	20.9998	22.9031	28.9852	29.8753	0.617	0.673	0.852	0.878	7.06111	34009
ENSMUSG00000030557	Mef2a	chr7:67231163-67372858	-	non-BED genes	No	95.9888	96.2769	116.6	123.378	0.677	0.679	0.823	0.871	24.1683	141696
ENSMUSG00000074746	Pdzd8	chr19:59296084-59345780	-	non-BED genes	No	33.3527	39.6469	57.2176	59.3888	0.671	0.798	1.151	1.195	12.7141	49697
ENSMUSG00000029176	Anapc4	chr5:52834015-52867797	+	non-BED genes	No	25.723	26.5509	25.5032	27.6527	0.761	0.786	0.755	0.819	11.0261	33783
ENSMUSG00000041911	Dlx1	chr2:71528113-71533981	+	non-BED genes	No	1.74393	1.73418	3.01145	2.73943	0.297	0.295	0.513	0.467	0.664522	5869
ENSMUSG00000030232	Aebp2	chr6:140622449-140678472	+	non-BED genes	No	38.4391	46.464	64.5109	65.5396	0.686	0.829	1.151	1.17	0.361552	56024
ENSMUSG00000039384	Dusp10	chr1:184013302-184075636	+	non-BED genes	No	28.6295	22.9031	29.7851	32.7698	0.459	0.367	0.478	0.526	0	62335
ENSMUSG00000026887	Mrrf	chr2:36136389-36190647	+	non-BED genes	No	41.5637	39.1685	39.243	40.3161	0.766	0.722	0.723	0.743	6.06357	54259
ENSMUSG00000052337	Immt	chr6:71831331-71875257	+	non-BED genes	No	32.0447	32.2318	26.7266	27.0842	0.729	0.734	0.608	0.617	3.23664	43927
ENSMUSG00000040372	Gpr63	chr4:24966407-25009233	+	non-BED genes	No	34.0066	34.3846	44.8424	45.4332	0.794	0.803	1.047	1.061	39.4725	42827
ENSMUSG00000014195	Dnajc7	chr11:100582818-100620168	-	non-BED genes	No	49.6294	45.9857	46.0658	47.3973	1.329	1.231	1.233	1.269	3.6448	37351
ENSMUSG00000051316	Taf7	chr18:37640902-37644204	-	non-BED genes	No	2.6159	3.22916	3.34083	3.41137	0.792	0.978	1.011	1.033	11.734	3303
ENSMUSG00000036214	Znrd1as	chr17:36958592-36965622	+	non-BED genes	No	8.71965	7.05632	5.17593	4.96199	1.24	1.004	0.736	0.706	13.6029	7031
ENSMUSG00000025724	Sec11a	chr7:80904889-80947780	-	non-BED genes	No	53.4805	52.9822	50.8182	49.9817	1.247	1.235	1.185	1.165	6.98148	42892
ENSMUSG00000021282	Eif5	chr12:111538101-111546753	+	non-BED genes	No	5.95843	8.6111	11.1047	9.04529	0.689	0.995	1.283	1.045	6.64081	8653
ENSMUSG00000029650	Slc46a3	chr5:147878437-147894815	-	non-BED genes	No	16.7853	14.3518	13.975	12.9218	1.025	0.876	0.853	0.789	6.88069	16379
ENSMUSG00000037771	Slc32a1	chr2:158610767-158615748	+	non-BED genes	No	2.68856	2.21257	3.38788	2.63606	0.54	0.444	0.68	0.529	3.83703	4982
ENSMUSG00000026344	Lypd1	chr1:125867622-125913101	-	non-BED genes	No	36.1866	32.3514	37.1726	42.0735	0.796	0.711	0.817	0.925	1.57901	45480
ENSMUSG00000031985	Gnpat	chr8:124863033-124890057	+	non-BED genes	No	30.0828	34.3248	33.5965	33.39	1.113	1.27	1.243	1.236	5.35274	27025
ENSMUSG00000002679	Med6	chr12:81573557-81595008	-	non-BED genes	No	11.1176	11.1825	11.387	10.3892	0.518	0.521	0.531	0.484	9.71336	21452
ENSMUSG00000064307	Lrrc51	chr7:101912984-101933895	-	non-BED genes	No	16.2767	14.7106	12.8928	13.1286	0.778	0.703	0.617	0.628	20.8128	20912
ENSMUSG00000024620	Pdgfrb	chr18:61045150-61085061	+	non-BED genes	No	40.0377	50.052	45.9246	45.9501	1.003	1.254	1.151	1.151	21.4556	39912
ENSMUSG00000022663	Atg3	chr16:45158785-45188538	+	non-BED genes	No	23.4704	19.9132	29.1734	30.9607	0.789	0.669	0.98	1.041	7.51828	29754
ENSMUSG00000048007	Timm8a1	chrX:134537256-134541865	-	non-BED genes	No	3.12454	2.39197	1.88216	1.91243	0.678	0.519	0.408	0.415	0.569664	4610
ENSMUSG00000024924	Vldlr	chr19:27216484-27254231	+	non-BED genes	No	41.1277	43.6535	37.549	36.2328	1.09	1.156	0.995	0.96	1.32381	37748
ENSMUSG00000037012	Hk1	chr10:62268855-62379908	-	non-BED genes	No	138.279	148.123	140.691	128.03	1.245	1.334	1.267	1.153	2.13845	111054
ENSMUSG00000036672	Cenpt	chr8:105844678-105852008	-	non-BED genes	No	8.21101	7.77391	5.4112	6.71936	1.12	1.06	0.738	0.917	74.8795	7331
ENSMUSG00000022394	L3mbtl2	chr15:81663889-81688315	+	non-BED genes	No	17.512	22.7835	19.0098	17.367	0.717	0.933	0.778	0.711	8.25146	24427
ENSMUSG00000032518	Rpsa	chr9:120127766-120132369	+	non-BED genes	No	3.63319	4.96334	4.65834	4.80692	0.789	1.078	1.012	1.044	3.14297	4604
ENSMUSG00000008307	1700109H08Rik	chr5:3571566-3584356	+	non-BED genes	No	13.6608	13.395	13.7397	13.0769	1.068	1.047	1.074	1.022	2.0872	12791
ENSMUSG00000039648	Ccbl1	chr2:30185124-30205847	-	non-BED genes	No	12.8615	10.9433	10.1166	11.1645	0.621	0.528	0.488	0.539	48.8461	20724
ENSMUSG00000054894	Atp5s	chr12:69724962-69744658	+	non-BED genes	No	15.8407	18.6574	14.6338	14.059	0.804	0.947	0.743	0.714	25.3564	19697
ENSMUSG00000030638	Sh3gl3	chr7:82173840-82307419	+	non-BED genes	No	96.7881	99.7452	125.493	127.564	0.725	0.747	0.939	0.955	0	133580
ENSMUSG00000097693	4930471M09Rik	chr6:91430460-91440854	-	non-BED genes	No	6.83039	5.08294	4.32896	6.04742	0.657	0.489	0.416	0.582	303.909	10395
ENSMUSG00000039738	Slx4	chr16:3979105-4003770	-	non-BED genes	No	28.9928	33.966	28.0441	28.1179	1.175	1.377	1.137	1.14	11.2852	24666
ENSMUSG00000021481	Zfp346	chr13:55105311-55134825	+	non-BED genes	No	24.197	26.0725	25.2209	24.2931	0.82	0.883	0.855	0.823	9.88294	29515
ENSMUSG00000050121	Opalin	chr19:41062474-41077113	-	non-BED genes	No	4.86847	4.18595	5.74058	6.09911	0.333	0.286	0.392	0.417	6.16722	14640
ENSMUSG00000044465	Fam160a2	chr7:105371211-105400054	-	non-BED genes	No	28.7022	34.564	32.0437	33.5451	0.995	1.198	1.111	1.163	4.27544	28844
ENSMUSG00000003208	Ccdc94	chr17:55959187-55967949	+	non-BED genes	No	9.15563	7.29551	5.27004	6.35755	1.045	0.833	0.601	0.725	14.2822	8763
ENSMUSG00000051721	BC068281	chr12:4843303-4856925	+	non-BED genes	No	7.84769	8.7307	9.83427	10.3892	0.576	0.641	0.722	0.763	21.3017	13623
ENSMUSG00000039354	Smarcal1	chr1:72583251-72633134	+	non-BED genes	No	45.7055	48.7962	39.9958	43.2623	0.916	0.978	0.802	0.867	26.8124	49884
ENSMUSG00000063889	Crem	chr18:3266048-3337748	-	non-BED genes	No	61.0376	43.8927	38.5372	41.7117	0.851	0.612	0.537	0.582	5.11774	71701
ENSMUSG00000024587	Nars	chr18:64499665-64516557	-	non-BED genes	No	13.5155	15.3086	12.5163	12.6634	0.8	0.906	0.741	0.75	17.4649	16893
ENSMUSG00000026643	Nmt2	chr2:3284212-3328877	+	non-BED genes	No	52.8266	56.8093	49.8771	50.0851	1.183	1.272	1.117	1.121	10.9805	44666
ENSMUSG00000056592	Zfp658	chr7:43562256-43575461	+	non-BED genes	No	12.6435	13.096	12.187	13.3353	0.957	0.992	0.923	1.01	13.7077	13206
ENSMUSG00000022111	Uchl3	chr14:101653967-101696124	+	non-BED genes	No	33.2073	32.6504	32.9377	36.8531	0.788	0.774	0.781	0.874	13.0262	42158
ENSMUSG00000020734	Grin2c	chr11:115249169-115267243	-	non-BED genes	No	5.15913	6.87692	9.31668	10.2341	0.285	0.38	0.515	0.566	1.76691	18075
ENSMUSG00000062376	2010012O05Rik	chr19:46689906-46703382	+	non-BED genes	No	17.8026	16.5644	13.5515	13.9039	1.321	1.229	1.006	1.032	10.7476	13477
ENSMUSG00000022314	Rad21	chr15:51962605-51991760	-	non-BED genes	No	21.8718	27.5675	25.4562	28.6348	0.75	0.946	0.873	0.982	3.30334	29156
ENSMUSG00000060427	Zfp868	chr8:69610857-69625548	-	non-BED genes	No	13.7335	11.6609	9.26962	10.0273	0.935	0.794	0.631	0.683	10.4829	14692
ENSMUSG00000031666	Rbl2	chr8:91070057-91123844	+	non-BED genes	No	32.5534	37.6736	30.4909	33.0799	0.605	0.7	0.567	0.615	2.57823	53788
ENSMUSG00000020130	Tbc1d15	chr10:115197877-115251493	-	non-BED genes	No	43.7436	51.846	66.0166	58.0966	0.816	0.967	1.231	1.084	3.99006	53617
ENSMUSG00000023973	Cnpy3	chr17:46735705-46752214	-	non-BED genes	No	18.4566	22.9031	16.2807	14.5241	1.118	1.387	0.986	0.88	4.34278	16510
ENSMUSG00000030435	U2af2	chr7:5062143-5079945	+	non-BED genes	No	19.8372	21.6473	19.3862	19.1243	1.114	1.216	1.089	1.074	2.14541	17803
ENSMUSG00000034343	Ube2f	chr1:91250311-91288877	+	non-BED genes	No	26.5223	30.7368	38.0196	35.7677	0.688	0.797	0.986	0.927	7.06044	38567
ENSMUSG00000002748	Baz1b	chr5:135187264-135246129	+	non-BED genes	No	57.913	70.623	72.3689	67.8138	0.984	1.2	1.229	1.152	7.90502	58866
ENSMUSG00000035367	Rmi1	chr13:58402597-58411149	+	non-BED genes	No	2.90655	2.93017	2.68207	3.77318	0.34	0.343	0.314	0.441	3.39732	8553
ENSMUSG00000024400	Wdr33	chr18:31804057-31908987	+	non-BED genes	No	84.5806	89.9381	106.201	106.321	0.806	0.857	1.012	1.013	22.2718	104931
ENSMUSG00000031105	Slc25a14	chrX:48623413-48662294	+	non-BED genes	No	31.6814	27.3881	26.9619	29.4618	0.815	0.704	0.693	0.758	3.25142	38882
ENSMUSG00000032712	2810474O19Rik	chr6:149309414-149335658	+	non-BED genes	No	20.7818	17.9398	22.3977	22.6908	0.792	0.684	0.853	0.865	18.9843	26245
ENSMUSG00000020400	Tnip1	chr11:54910785-54962917	-	non-BED genes	No	47.5948	53.7596	49.5478	48.5861	0.913	1.031	0.95	0.932	0	52133
ENSMUSG00000048240	Gng7	chr10:80948624-81014945	-	non-BED genes	No	81.2381	85.6924	77.7801	74.2231	1.225	1.292	1.173	1.119	17.752	66322
ENSMUSG00000031683	Lsm6	chr8:78804865-78821140	-	non-BED genes	No	9.08297	8.7905	10.1166	11.4229	0.558	0.54	0.622	0.702	13.3219	16276
ENSMUSG00000024299	Adamts10	chr17:33524204-33553782	+	non-BED genes	No	18.7473	18.5976	19.198	18.349	0.634	0.629	0.649	0.62	7.17379	29579
ENSMUSG00000019961	Tmpo	chr10:91147571-91171582	-	non-BED genes	No	15.1141	18.1192	18.351	20.003	0.629	0.755	0.764	0.833	7.77407	24012
ENSMUSG00000022536	Glyr1	chr16:5013906-5049910	-	non-BED genes	No	36.9859	45.5671	29.4558	32.0979	1.027	1.266	0.818	0.891	14.1843	36005
ENSMUSG00000069206	Zfp874a	chr13:67424549-67451624	-	non-BED genes	No	11.7715	9.80708	10.8224	11.9398	0.435	0.362	0.4	0.441	14.5069	27076
ENSMUSG00000053390	Zfp952	chr17:32993129-33005457	+	non-BED genes	No	13.2248	11.2423	10.6812	11.6813	1.073	0.912	0.866	0.947	14.6217	12329
ENSMUSG00000028127	Abcd3	chr3:121758909-121815302	-	non-BED genes	No	26.4496	25.9529	37.0785	40.5746	0.469	0.46	0.657	0.719	5.36761	56394
ENSMUSG00000023391	Dlx2	chr2:71543409-71546754	-	non-BED genes	No	1.08996	1.07639	1.27046	0.930373	0.326	0.322	0.38	0.278	0.924093	3346
ENSMUSG00000020184	Mdm2	chr10:117688888-117710758	-	non-BED genes	No	28.4115	25.4745	27.903	24.7066	1.299	1.165	1.276	1.13	5.99674	21871
ENSMUSG00000026466	Tor1aip1	chr1:156004599-156036480	-	non-BED genes	No	26.3769	22.0659	17.7864	18.5041	0.827	0.692	0.558	0.58	3.61774	31882
ENSMUSG00000027997	Casp6	chr3:129901425-129914103	+	non-BED genes	No	5.30446	4.54475	9.41078	10.0273	0.418	0.358	0.742	0.791	20.4218	12679
ENSMUSG00000078584	AU022252	chr4:119203570-119232712	-	non-BED genes	No	16.4947	19.4946	17.6452	19.4344	0.566	0.669	0.605	0.667	12.3811	29143
ENSMUSG00000073609	D2hgdh	chr1:93825240-93852348	+	non-BED genes	No	18.5293	14.0528	8.32854	7.44298	0.684	0.518	0.307	0.275	66.9101	27109
ENSMUSG00000002812	Flii	chr11:60714123-60727263	-	non-BED genes	No	12.4255	12.4383	10.1636	9.09698	0.946	0.947	0.773	0.692	1.78057	13141
ENSMUSG00000087141	Plcxd2	chr16:45959263-46010218	-	non-BED genes	No	60.0929	56.8093	54.3002	57.6314	1.179	1.115	1.066	1.131	3.36191	50956
ENSMUSG00000009207	Lnp	chr2:74520291-74579435	-	non-BED genes	No	44.0342	43.5339	43.4778	44.8129	0.745	0.736	0.735	0.758	0.0354262	59145
ENSMUSG00000026934	Lhx3	chr2:26200212-26208289	-	non-BED genes	No	3.05188	5.56133	9.599	6.51261	0.378	0.688	1.188	0.806	3.85529	8078
ENSMUSG00000067215	Usp51	chrX:153006469-153009416	+	non-BED genes	No	3.63319	3.16936	1.31751	1.2405	1.232	1.075	0.447	0.421	0.062356	2948
ENSMUSG00000000194	Gpr107	chr2:31152316-31219548	+	non-BED genes	No	62.1275	72.7757	79.1917	81.0458	0.924	1.082	1.178	1.205	2.73805	67233
ENSMUSG00000061613	U2af1	chr17:31647082-31658754	-	non-BED genes	No	6.39441	8.3719	11.7635	11.1128	0.548	0.717	1.008	0.952	5.62599	11673
ENSMUSG00000019857	Asf1a	chr10:53596961-53609213	+	non-BED genes	No	7.26638	8.2523	8.94024	9.71722	0.593	0.673	0.73	0.793	10.2088	12253
ENSMUSG00000034263	Vwa9	chr9:64960832-64986974	+	non-BED genes	No	31.9721	34.9826	26.209	24.3447	1.223	1.338	1.003	0.931	36.0411	26143
ENSMUSG00000031631	4933411K20Rik	chr8:46151771-46195590	+	non-BED genes	No	42.799	43.0555	48.889	49.4131	0.977	0.983	1.116	1.128	0.633964	43820
ENSMUSG00000013736	Trnt1	chr6:106769120-106782474	+	non-BED genes	No	14.6781	16.086	17.6923	16.9018	1.099	1.204	1.325	1.266	8.18464	13355
ENSMUSG00000029142	Mrpl33	chr5:31596935-31701972	+	non-BED genes	No	105.29	96.8151	93.6373	98.1543	1.002	0.922	0.891	0.934	1.30749	105038
ENSMUSG00000050953	Gja1	chr10:56377300-56390419	+	non-BED genes	No	4.94114	3.94675	10.3048	8.47673	0.377	0.301	0.785	0.646	7.06185	13120
ENSMUSG00000022299	Slc25a32	chr15:39094191-39112716	-	non-BED genes	No	14.0968	13.096	18.4451	14.886	0.761	0.707	0.996	0.804	11.2304	18526
ENSMUSG00000022971	Ifnar2	chr16:91372783-91405589	+	non-BED genes	No	20.7818	22.3649	20.5626	23.7762	0.633	0.682	0.627	0.725	4.32476	32807
ENSMUSG00000034947	Tmem106a	chr11:101582242-101591788	+	non-BED genes	No	5.95843	6.21913	7.05809	6.04742	0.624	0.651	0.739	0.633	2.84876	9547
ENSMUSG00000022401	Xpnpep3	chr15:81400138-81456807	+	non-BED genes	No	30.6641	29.1821	27.1972	30.909	0.541	0.515	0.48	0.545	20.9728	56670
ENSMUSG00000063253	Scoc	chr8:83434493-83458391	-	non-BED genes	No	17.5846	16.4448	15.3396	13.1286	0.736	0.688	0.642	0.549	0.26996	23899
ENSMUSG00000028842	Ago3	chr4:126331704-126429556	-	non-BED genes	No	48.5394	45.5671	46.6775	48.8962	0.496	0.466	0.477	0.5	76.7821	97853
ENSMUSG00000097831	4930540M05Rik	chr6:119896159-119902653	-	non-BED genes	No	9.2283	6.69752	2.91734	4.03161	1.421	1.031	0.449	0.621	20.3706	6495
ENSMUSG00000029440	Psmd9	chr5:123228190-123250131	+	non-BED genes	No	21.8718	25.9529	24.0446	22.3289	0.997	1.183	1.096	1.018	14.9698	21942
ENSMUSG00000015243	Abca1	chr4:53030787-53159895	-	non-BED genes	No	59.221	51.4872	72.3689	76.9625	0.459	0.399	0.561	0.596	4.00106	129109
ENSMUSG00000078173	Lenep	chr3:89400988-89402793	-	non-BED genes	No	0.58131	1.13619	0.894024	0.671936	0.322	0.629	0.495	0.372	0.552985	1806
ENSMUSG00000039048	Foxred1	chr9:35204206-35211055	-	non-BED genes	No	8.86498	7.65431	5.59942	5.22042	1.294	1.117	0.817	0.762	5.2291	6850
ENSMUSG00000064329	Scn1a	chr2:66270781-66440840	-	non-BED genes	Yes	142.058	137.299	144.503	141.003	0.835	0.807	0.85	0.829	5.67275	170060
ENSMUSG00000036676	Tmtc3	chr10:100443902-100487350	-	non-BED genes	No	29.8648	30.7966	30.2557	30.1337	0.687	0.709	0.696	0.694	80.8382	43449
ENSMUSG00000026499	Acbd3	chr1:180726043-180754203	+	non-BED genes	No	20.9998	24.0393	24.9386	26.4122	0.746	0.854	0.886	0.938	19.1	28161
ENSMUSG00000006676	Usp19	chr9:108490676-108502333	+	non-BED genes	No	11.9169	12.9166	8.84614	7.7531	1.022	1.108	0.759	0.665	2.90703	11658
ENSMUSG00000023009	Nckap5l	chr15:99422035-99457748	-	non-BED genes	No	26.9583	40.9027	38.8665	35.871	0.755	1.145	1.088	1.004	3.30424	35714
ENSMUSG00000028899	Taf12	chr4:132274375-132295766	+	non-BED genes	No	20.3459	15.787	14.3044	12.9735	0.951	0.738	0.669	0.606	21.728	21392
ENSMUSG00000007591	Tssk4	chr14:55650182-55652539	+	non-BED genes	No	0.799301	1.73418	1.2234	1.654	0.339	0.735	0.519	0.701	1.25151	2358
ENSMUSG00000029716	Tfr2	chr5:137569851-137587481	+	non-BED genes	No	14.9687	14.6508	11.387	11.733	0.849	0.831	0.646	0.665	7.17106	17631
ENSMUSG00000031843	Mphosph6	chr8:117791645-117801929	-	non-BED genes	No	10.1729	12.0197	10.7283	11.2162	0.989	1.169	1.043	1.091	44.4488	10285
ENSMUSG00000035725	Prkx	chrX:77761411-77796278	-	non-BED genes	No	26.3769	24.3981	26.7266	27.446	0.756	0.7	0.767	0.787	0.0550289	34868
ENSMUSG00000037509	Arhgef4	chr1:34678188-34813309	+	non-BED genes	No	151.431	156.196	152.408	154.855	1.121	1.156	1.128	1.146	0.984021	135122
ENSMUSG00000018171	Vmp1	chr11:86583865-86683836	-	non-BED genes	No	117.207	120.316	124.316	118.829	1.172	1.203	1.244	1.189	19.9096	99972
ENSMUSG00000022799	Arhgap31	chr16:38598340-38713274	-	non-BED genes	No	66.6327	69.9054	81.7797	85.4909	0.58	0.608	0.712	0.744	21.348	114935
ENSMUSG00000026019	Wdr12	chr1:60076868-60098645	-	non-BED genes	No	22.7438	19.0162	12.6104	13.0769	1.044	0.873	0.579	0.6	0.167914	21778
ENSMUSG00000057093	C030039L03Rik	chr7:27689340-27706484	+	non-BED genes	No	10.3909	11.1825	8.70497	8.78685	0.606	0.652	0.508	0.513	25.5034	17145
ENSMUSG00000038344	Txlng	chrX:162778919-162829454	-	non-BED genes	No	22.8164	23.6207	22.1624	23.4144	0.451	0.467	0.439	0.463	9.15072	50536
ENSMUSG00000026491	Ahctf1	chr1:179744894-179803680	-	non-BED genes	No	42.0723	45.5073	43.8072	46.7254	0.716	0.774	0.745	0.795	12.8604	58787
ENSMUSG00000026670	Uap1	chr1:170141938-170174957	-	non-BED genes	No	26.8856	34.265	31.9967	34.3204	0.814	1.038	0.969	1.039	21.7411	33020
ENSMUSG00000097775	4931440J10Rik	chr14:62760501-62830126	+	non-BED genes	No	59.1483	60.0983	56.3235	60.2675	0.85	0.863	0.809	0.866	1.29407	69626
ENSMUSG00000032534	Cep63	chr9:102586578-102626534	-	non-BED genes	No	31.5361	29.7202	30.2557	31.6327	0.789	0.744	0.757	0.792	5.81702	39957
ENSMUSG00000016481	Cr1l	chr1:195103789-195131570	-	non-BED genes	No	23.5431	19.973	20.7508	23.3627	0.847	0.719	0.747	0.841	7.56897	27782
ENSMUSG00000054309	Cpsf3	chr12:21286297-21315056	+	non-BED genes	No	23.7611	26.5509	22.3036	22.8975	0.826	0.923	0.776	0.796	33.9763	28760
ENSMUSG00000038855	Itpkb	chr1:180330485-180424802	+	non-BED genes	No	112.629	111.227	103.377	102.083	1.194	1.179	1.096	1.082	6.84974	94318
ENSMUSG00000005198	Polr2a	chr11:69733997-69758637	-	non-BED genes	No	23.1071	25.8333	23.6211	22.6391	0.938	1.048	0.959	0.919	13.6912	24641
ENSMUSG00000060935	AI597468	chr10:85102627-85117747	+	non-BED genes	No	15.6227	16.983	16.563	16.7467	1.033	1.123	1.095	1.108	4.25615	15121
ENSMUSG00000029676	Pot1a	chr6:25743737-25809246	-	non-BED genes	No	31.1728	28.4047	35.6669	34.0103	0.476	0.434	0.544	0.519	100.078	65510
ENSMUSG00000044308	Ubr3	chr2:69897246-70024013	+	non-BED genes	No	161.168	163.491	144.361	136.92	1.271	1.29	1.139	1.08	21.054	126768
ENSMUSG00000021928	Ebpl	chr14:61339763-61360445	-	non-BED genes	No	16.64	15.5478	17.0806	17.9355	0.805	0.752	0.826	0.867	52.5191	20683
ENSMUSG00000003623	Crot	chr5:8966033-8997324	-	non-BED genes	No	15.4774	12.9764	15.669	18.1423	0.495	0.415	0.501	0.58	25.9061	31292
ENSMUSG00000066324	Impad1	chr4:4762484-4793355	-	non-BED genes	No	29.0655	29.0027	29.644	29.0483	0.941	0.939	0.96	0.941	5.79635	30872
ENSMUSG00000025925	Terf1	chr1:15805658-15843428	+	non-BED genes	No	25.505	28.5841	28.3265	28.273	0.675	0.757	0.75	0.749	34.1234	37771
ENSMUSG00000032462	Pik3cb	chr9:99038402-99140621	-	non-BED genes	No	57.3317	61.8923	86.2498	88.7989	0.561	0.605	0.844	0.869	1.77997	102220
ENSMUSG00000030538	Cib1	chr7:80227156-80232813	-	non-BED genes	No	3.85118	4.54475	4.7995	5.06536	0.681	0.803	0.848	0.895	7.17675	5658
ENSMUSG00000020485	Supt4a	chr11:87737552-87743623	+	non-BED genes	No	6.68507	6.69752	5.45825	5.27211	1.101	1.103	0.899	0.868	21.838	6072
ENSMUSG00000013150	Gfod2	chr8:105713854-105758664	-	non-BED genes	No	28.5569	25.5343	29.644	28.8932	0.637	0.57	0.662	0.645	12.2415	44811
ENSMUSG00000063931	Pepd	chr7:34912379-35044710	+	non-BED genes	No	116.698	138.914	157.913	149.635	0.882	1.05	1.193	1.131	24.2915	132332
ENSMUSG00000004371	Il11	chr7:4773055-4782857	-	non-BED genes	No	3.56052	4.00655	3.81137	5.53055	0.363	0.409	0.389	0.564	1.84789	9803
ENSMUSG00000024360	Etf1	chr18:34902785-34932007	-	non-BED genes	No	30.0828	38.3313	33.2201	31.8911	1.029	1.312	1.137	1.091	3.01861	29223
ENSMUSG00000028041	Adam15	chr3:89338542-89349996	-	non-BED genes	No	10.3909	13.694	9.17551	7.85648	0.907	1.195	0.801	0.686	1.33397	11455
ENSMUSG00000046139	Patl1	chr19:11912399-11945096	+	non-BED genes	No	23.3977	27.8067	31.5732	29.927	0.716	0.85	0.966	0.915	3.62967	32698
ENSMUSG00000070883	Ccdc173	chr2:69758033-69789575	-	non-BED genes	No	34.588	33.8464	27.5736	28.9449	1.097	1.073	0.874	0.918	55.0566	31543
ENSMUSG00000002846	Timmdc1	chr16:38498347-38522663	-	non-BED genes	No	17.512	17.5212	12.6575	13.5938	0.72	0.721	0.521	0.559	42.2603	24317
ENSMUSG00000020883	Fbxl20	chr11:98082556-98150403	-	non-BED genes	No	58.9303	73.3139	65.499	69.5195	0.869	1.081	0.965	1.025	1.54749	67848
ENSMUSG00000047789	Slc38a9	chr13:112660766-112738743	+	non-BED genes	No	47.3041	46.5238	48.5596	50.8604	0.607	0.597	0.623	0.652	30.0646	77978
ENSMUSG00000031026	Trim66	chr7:109449006-109508134	-	non-BED genes	No	71.1378	71.2808	59.2879	53.238	1.203	1.206	1.003	0.9	0	59129
ENSMUSG00000019777	Hdac2	chr10:36974544-37001889	+	non-BED genes	No	24.7057	29.78	32.6084	34.1653	0.903	1.089	1.192	1.249	2.92759	27346
ENSMUSG00000097785	B230217O12Rik	chr19:57323385-57360775	-	non-BED genes	No	43.8889	48.4374	42.6308	38.0936	1.174	1.295	1.14	1.019	19.4765	37391
ENSMUSG00000024067	Dpy30	chr17:74299474-74323944	-	non-BED genes	No	23.0344	19.4348	16.0924	17.7805	0.941	0.794	0.658	0.727	0	24471
ENSMUSG00000058503	Fam133b	chr5:3543844-3569810	+	non-BED genes	No	18.7473	18.3584	24.6563	22.3806	0.722	0.707	0.95	0.862	3.78601	25967
ENSMUSG00000020733	Slc9a3r1	chr11:115163341-115181181	+	non-BED genes	No	7.19371	5.68093	9.74016	10.5442	0.403	0.318	0.546	0.591	7.49039	17841
ENSMUSG00000032527	Pccb	chr9:100982032-101034898	-	non-BED genes	No	31.7541	29.8996	26.6325	28.9449	0.601	0.566	0.504	0.548	10.6741	52867
ENSMUSG00000054387	Mdm4	chr1:132989845-133025366	-	non-BED genes	No	31.2454	30.1986	25.6444	26.8257	0.88	0.85	0.722	0.755	2.24248	35522
ENSMUSG00000037316	Bag4	chr8:25764538-25785209	-	non-BED genes	No	22.6711	21.5875	22.6329	24.7582	1.097	1.044	1.095	1.198	8.65027	20672
ENSMUSG00000037851	Iars	chr13:49682100-49734267	+	non-BED genes	No	32.9167	36.2982	26.4914	28.7899	0.631	0.696	0.508	0.552	7.04799	52168
ENSMUSG00000027655	Dhx35	chr2:158794807-158858214	+	non-BED genes	No	47.4494	54.7164	71.0514	69.3128	0.748	0.863	1.121	1.093	9.80192	63408
ENSMUSG00000097007	4930432B10Rik	chr10:11244790-11281221	-	non-BED genes	No	21.3631	14.7704	20.2802	19.6412	0.586	0.405	0.557	0.539	33.4305	36432
ENSMUSG00000003721	Insig2	chr1:121304353-121332589	-	non-BED genes	No	34.9513	33.7866	38.4901	32.9765	1.238	1.197	1.363	1.168	0	28237
ENSMUSG00000031299	Pdha1	chrX:160122209-160138413	-	non-BED genes	No	11.8442	13.4548	12.2811	11.6813	0.731	0.83	0.758	0.721	4.44468	16205
ENSMUSG00000075700	Selt	chr3:58576636-58593133	+	non-BED genes	No	15.55	14.2322	20.2332	18.1423	0.943	0.863	1.226	1.1	5.55657	16498
ENSMUSG00000042207	Kdm5b	chr1:134560171-134632877	+	non-BED genes	No	69.3212	86.4698	87.4732	88.127	0.953	1.189	1.203	1.212	60.0935	72707
ENSMUSG00000052656	Rnf103	chr6:71493894-71525020	+	non-BED genes	No	33.498	32.172	39.9958	40.3161	1.076	1.034	1.285	1.295	8.44341	31127
ENSMUSG00000002550	Uck1	chr2:32255002-32260159	-	non-BED genes	No	5.23179	5.92013	4.98771	4.39343	1.014	1.148	0.967	0.852	9.03385	5158
ENSMUSG00000008604	Ubqln4	chr3:88553716-88569725	+	non-BED genes	No	13.3701	17.9996	11.2929	10.2858	0.835	1.124	0.705	0.642	9.83513	16010
ENSMUSG00000022142	Nup155	chr15:8109313-8159857	+	non-BED genes	No	19.6919	18.9564	21.4566	24.2414	0.39	0.375	0.425	0.48	13.26	50545
ENSMUSG00000023156	Rpp14	chr14:8080367-8091834	+	non-BED genes	No	15.55	12.9764	8.9873	8.06323	1.356	1.132	0.784	0.703	21.9679	11468
ENSMUSG00000038535	Zfp280d	chr9:72274860-72363777	+	non-BED genes	No	63.2175	60.8757	61.6877	65.643	0.711	0.685	0.694	0.738	1.6992	88918
ENSMUSG00000026127	Imp4	chr1:34439851-34445736	+	non-BED genes	No	5.37712	5.56133	5.31709	5.22042	0.914	0.945	0.903	0.887	24.2169	5886
ENSMUSG00000021996	Esd	chr14:74732297-74750765	+	non-BED genes	No	15.8407	13.694	15.9513	14.9893	0.858	0.741	0.864	0.812	13.1768	18469
ENSMUSG00000041765	Ubac2	chr14:121878606-122021034	+	non-BED genes	No	82.1827	92.9879	142.667	146.224	0.577	0.653	1.002	1.027	4.80818	142429
ENSMUSG00000037818	3110057O12Rik	chr3:40846970-40938138	+	non-BED genes	No	36.3319	37.4344	37.0314	40.5229	0.399	0.411	0.406	0.444	1.05866	91169
ENSMUSG00000066892	Fbxl12	chr9:20618118-20644767	-	non-BED genes	No	18.3839	18.8966	18.8216	20.8817	0.69	0.709	0.706	0.784	78.3328	26650
ENSMUSG00000050174	Nudt6	chr3:37404910-37420211	-	non-BED genes	No	17.6573	17.1624	13.7868	14.9376	1.154	1.122	0.901	0.976	2.37133	15302
ENSMUSG00000018189	Uchl5	chr1:143777278-143807466	+	non-BED genes	No	20.7818	22.3649	19.5274	21.1401	0.688	0.741	0.647	0.7	16.7159	30189
ENSMUSG00000001674	Ddx18	chr1:121553835-121567989	-	non-BED genes	No	10.6816	9.20909	7.48157	8.37335	0.755	0.651	0.529	0.592	18.765	14155
ENSMUSG00000032517	Mobp	chr9:120149742-120181484	+	non-BED genes	No	36.6952	35.0424	29.0793	26.4122	1.156	1.104	0.916	0.832	3.31307	31743
ENSMUSG00000039701	Usp53	chr3:122933601-122984447	-	non-BED genes	No	40.2557	45.2083	46.0658	44.8129	0.792	0.889	0.906	0.881	21.9904	50847
ENSMUSG00000032397	Tipin	chr9:64281607-64304792	+	non-BED genes	No	12.0622	13.3352	10.2578	10.8543	0.52	0.575	0.442	0.468	21.0951	23186
ENSMUSG00000041653	Pnpla3	chr15:84167816-84189512	+	non-BED genes	No	20.3459	25.8333	20.5155	23.2593	0.938	1.191	0.946	1.072	52.6981	21697
ENSMUSG00000040620	Dhx33	chr11:70984091-71004437	-	non-BED genes	No	22.6711	26.0725	18.1628	15.5579	1.114	1.281	0.893	0.765	6.04801	20347
ENSMUSG00000049969	Plekhf2	chr4:10988662-11007927	-	non-BED genes	No	12.1348	11.8403	15.9042	15.041	0.63	0.615	0.826	0.781	0.642481	19266
ENSMUSG00000048794	Ccdc37	chr6:90403736-90428797	-	non-BED genes	No	23.1797	23.8001	23.0094	22.2256	0.925	0.95	0.918	0.887	12.6937	25062
ENSMUSG00000042599	Jhdm1d	chr6:39136623-39206789	-	non-BED genes	No	52.7539	59.4405	68.7458	67.1419	0.752	0.847	0.98	0.957	7.10555	70167
ENSMUSG00000042997	Nhlrc3	chr3:53448588-53463323	-	non-BED genes	No	16.64	16.2056	12.7987	13.9039	1.129	1.1	0.869	0.944	3.80646	14736
ENSMUSG00000069806	Cacng7	chr7:3332955-3368216	+	non-BED genes	No	31.6087	36.2384	31.6202	31.2709	0.896	1.028	0.897	0.887	0.919316	35262
ENSMUSG00000028030	Tbck	chr3:132684144-132838506	+	non-BED genes	No	95.2622	89.2803	88.2261	98.9813	0.617	0.578	0.572	0.641	23.6129	154363
ENSMUSG00000079509	Zfx	chrX:94074631-94123702	-	non-BED genes	No	17.8753	18.478	23.3858	24.6032	0.364	0.377	0.477	0.501	0.75945	49072
ENSMUSG00000050199	Lgr4	chr2:109917647-110014257	+	non-BED genes	No	44.3249	48.557	87.1438	92.7271	0.459	0.503	0.902	0.96	20.0363	96611
ENSMUSG00000063663	Brwd3	chrX:108737016-108834372	-	non-BED genes	No	31.8994	32.77	33.5965	33.6485	0.328	0.337	0.345	0.346	39.3152	97357
ENSMUSG00000063884	Ptcd3	chr6:71880648-71908762	-	non-BED genes	No	26.9583	25.1755	22.5388	21.1401	0.959	0.895	0.802	0.752	6.11273	28115
ENSMUSG00000021022	Ppp2r3c	chr12:55280814-55303000	-	non-BED genes	No	23.1797	14.591	16.9394	15.9714	1.045	0.658	0.763	0.72	3.75061	22187
ENSMUSG00000041488	Stx3	chr19:11775119-11819403	-	non-BED genes	No	47.0861	52.5038	48.2773	49.103	1.063	1.186	1.09	1.109	0.622113	44285
ENSMUSG00000035401	2210018M11Rik	chr7:98590615-98656569	-	non-BED genes	No	65.906	74.6893	85.6381	84.7673	0.999	1.132	1.298	1.285	6.84379	65955
ENSMUSG00000052428	Tmco1	chr1:167308670-167333978	+	non-BED genes	No	16.422	18.1192	14.869	16.2298	0.649	0.716	0.587	0.641	53.8189	25309
ENSMUSG00000021518	Ptdss1	chr13:66932830-66998401	+	non-BED genes	No	64.6708	66.0184	60.7937	58.0449	0.986	1.007	0.927	0.885	4.5474	65572
ENSMUSG00000049971	Glt1d1	chr5:127632262-127708754	+	non-BED genes	No	55.3698	57.6465	55.7589	53.393	0.724	0.754	0.729	0.698	15.6392	76493
ENSMUSG00000028367	Txn1	chr4:57943373-57956411	-	non-BED genes	No	16.1314	14.8302	10.1166	9.51047	1.237	1.137	0.776	0.729	9.25504	13039
ENSMUSG00000014601	Strip1	chr3:107612532-107631710	-	non-BED genes	No	17.5846	20.1524	16.1865	17.367	0.917	1.051	0.844	0.906	3.75254	19179
ENSMUSG00000020818	Mfsd11	chr11:116852440-116875635	+	non-BED genes	No	27.3216	26.0127	20.6096	18.5041	1.178	1.121	0.888	0.798	0.807272	23196
ENSMUSG00000032583	Mon1a	chr9:107888129-107903125	+	non-BED genes	No	17.076	19.076	15.0102	13.0769	1.139	1.272	1.001	0.872	27.467	14997
ENSMUSG00000035649	Zcchc7	chr4:44755877-44932215	+	non-BED genes	No	111.394	105.127	139.985	148.136	0.632	0.596	0.794	0.84	0.134102	176339
ENSMUSG00000096932	5033403F01Rik	chr13:38960619-38966299	+	non-BED genes	No	7.6297	5.74073	4.84655	4.4968	1.343	1.011	0.853	0.792	17.2545	5681
ENSMUSG00000042354	Gnl3	chr14:31012434-31019089	-	non-BED genes	No	7.77502	8.2523	6.54049	6.92611	1.168	1.24	0.983	1.041	3.45156	6656
ENSMUSG00000041685	Fcho2	chr13:98723407-98815449	-	non-BED genes	No	90.3937	93.4065	81.3092	87.5067	0.982	1.015	0.883	0.951	7.52008	92043
ENSMUSG00000092345	Gm20503	chr4:59003210-59041888	+	non-BED genes	No	32.9167	37.7932	45.1718	45.1231	0.851	0.977	1.168	1.167	3.70553	38679
ENSMUSG00000039254	Pomt1	chr2:32236590-32255005	+	non-BED genes	No	13.1521	17.3418	15.4337	12.1465	0.714	0.942	0.838	0.66	28.5404	18416
ENSMUSG00000079615	Hspa14	chr2:3504529-3512759	-	non-BED genes	No	8.35633	12.4383	9.12846	9.76891	1.015	1.511	1.109	1.187	4.25938	8231
ENSMUSG00000003527	Dgcr14	chr16:17900711-17911348	-	non-BED genes	No	8.86498	8.1925	7.38746	6.61598	0.833	0.77	0.694	0.622	4.99119	10638
ENSMUSG00000049643	2310022A10Rik	chr7:27553295-27582094	+	non-BED genes	No	24.9963	26.6705	19.2451	17.9872	0.868	0.926	0.668	0.625	15.6198	28800
ENSMUSG00000028550	Atg4c	chr4:99193934-99259787	+	non-BED genes	No	83.9267	81.028	76.0391	70.6566	1.274	1.23	1.155	1.073	32.5392	65854
ENSMUSG00000020709	Adap2	chr11:80154105-80178958	+	non-BED genes	No	6.6124	4.90354	10.2107	11.5263	0.266	0.197	0.411	0.464	1.434	24854
ENSMUSG00000033618	Map3k13	chr16:21891969-21931877	+	non-BED genes	No	24.9963	26.4313	29.3616	32.3046	0.626	0.662	0.736	0.809	0.993747	39909
ENSMUSG00000033228	Scaf11	chr15:96411698-96460843	-	non-BED genes	No	25.1417	25.4147	30.538	31.2192	0.512	0.517	0.621	0.635	2.83265	49146
ENSMUSG00000038084	Opa1	chr16:29579334-29654884	+	non-BED genes	No	71.0652	74.9285	70.4397	76.6007	0.941	0.992	0.932	1.014	15.2818	75551
ENSMUSG00000050608	Minos1	chr4:139101814-139131113	-	non-BED genes	No	28.5569	25.8931	33.4553	30.8057	0.975	0.884	1.142	1.051	26.1762	29300
ENSMUSG00000068151	A230006K03Rik	chr7:61127996-61311721	-	non-BED genes	No	65.5427	52.2646	71.8984	81.3042	0.357	0.284	0.391	0.443	9.11343	183726
ENSMUSG00000027108	Ola1	chr2:73092801-73218924	-	non-BED genes	No	83.2	77.2607	106.859	108.647	0.66	0.613	0.847	0.861	0	126124
ENSMUSG00000028012	Rrh	chr3:129804408-129822505	-	non-BED genes	No	9.80961	8.3121	11.2459	11.9915	0.542	0.459	0.621	0.663	5.14433	18098
ENSMUSG00000027303	Ptpra	chr2:130450278-130554026	+	non-BED genes	No	106.234	112.841	125.258	131.079	1.024	1.088	1.207	1.263	6.19539	103749
ENSMUSG00000034154	Ino80	chr2:119373042-119477687	-	non-BED genes	No	67.3593	74.4501	80.1799	70.3982	0.644	0.711	0.766	0.673	1.36274	104646
ENSMUSG00000029352	Crybb3	chr5:113075839-113081584	-	non-BED genes	No	4.50515	7.23571	4.09369	4.13499	0.784	1.259	0.712	0.72	3.76838	5746
ENSMUSG00000002274	Metrn	chr17:25794571-25797136	-	non-BED genes	No	0.871965	1.37538	1.74099	1.49893	0.34	0.536	0.678	0.584	0.180198	2566
ENSMUSG00000021244	Ylpm1	chr12:84996321-85070515	+	non-BED genes	No	58.349	64.1646	72.0866	74.1714	0.786	0.865	0.972	1	7.54519	74195
ENSMUSG00000024480	Ap3s1	chr18:46741917-46790826	+	non-BED genes	No	19.8372	26.9695	28.5617	33.4934	0.406	0.551	0.584	0.685	1.11442	48910
ENSMUSG00000070814	6330408A02Rik	chr7:13258967-13278721	-	non-BED genes	No	20.9272	15.6076	17.1276	16.8501	1.059	0.79	0.867	0.853	3.83782	19755
ENSMUSG00000035275	Raver2	chr4:101068983-101152370	+	non-BED genes	No	61.7642	68.53	71.9925	75.3085	0.741	0.822	0.863	0.903	2.07784	83388
ENSMUSG00000034024	Cct2	chr10:117050998-117063814	-	non-BED genes	No	16.0587	15.3086	12.3752	12.405	1.253	1.194	0.966	0.968	53.1655	12817
ENSMUSG00000031357	Syap1	chrX:162857057-162888447	-	non-BED genes	No	10.3183	13.2754	11.9987	13.0252	0.329	0.423	0.382	0.415	22.0314	31391
ENSMUSG00000031954	Cfdp1	chr8:111768473-111854310	-	non-BED genes	No	57.4044	56.9887	77.4037	74.8433	0.669	0.664	0.902	0.872	18.3923	85838
ENSMUSG00000026447	Pik3c2b	chr1:133045667-133108687	+	non-BED genes	No	55.6604	64.4038	71.5219	67.0385	0.883	1.022	1.135	1.064	1.32772	63021
ENSMUSG00000029577	Ube3b	chr5:114380628-114421168	+	non-BED genes	No	40.9824	41.6203	38.7724	36.8014	1.011	1.027	0.956	0.908	23.4112	40541
ENSMUSG00000001767	Crnkl1	chr2:145917479-145935014	-	non-BED genes	No	13.5881	15.787	11.6223	10.8543	0.775	0.9	0.663	0.619	0.507292	17536
ENSMUSG00000029864	Gstk1	chr6:42245935-42250441	+	non-BED genes	No	3.34253	4.12615	4.61128	4.4968	0.742	0.915	1.023	0.998	25.0468	4507
ENSMUSG00000028559	Osbpl9	chr4:109061145-109202272	-	non-BED genes	No	83.854	87.1276	128.316	129.839	0.594	0.617	0.909	0.92	55.9078	141128
ENSMUSG00000068115	Ninl	chr2:150934519-151039382	-	non-BED genes	Yes	79.9301	80.6094	87.7556	85.646	0.762	0.769	0.837	0.817	10.1343	104864
ENSMUSG00000020387	Phf15	chr11:51813455-51857653	-	non-BED genes	No	36.0412	37.4344	36.1374	36.1295	0.815	0.847	0.818	0.817	1.22921	44199
ENSMUSG00000072955	Tmsb15l	chrX:136954988-136976869	-	non-BED genes	No	4.94114	4.12615	3.5761	4.13499	0.226	0.189	0.163	0.189	56.8237	21882
ENSMUSG00000072501	Phf20l1	chr15:66577572-66645255	+	non-BED genes	No	58.4217	62.4305	65.0285	68.8476	0.863	0.922	0.961	1.017	5.15874	67684
ENSMUSG00000028798	Eif3i	chr4:129591960-129600648	-	non-BED genes	No	7.6297	7.41511	8.70497	8.1666	0.878	0.853	1.002	0.94	2.79146	8689
ENSMUSG00000097225	A330076H08Rik	chr7:61930913-61982356	-	non-BED genes	No	48.2487	41.8595	31.5732	33.7518	0.938	0.814	0.614	0.656	13.7471	51444
ENSMUSG00000053178	Gm9897	chr5:4192367-4197651	+	non-BED genes	No	3.12454	2.51157	3.29377	3.6698	0.591	0.475	0.623	0.694	0.032954	5285
ENSMUSG00000056260	Lrif1	chr3:106684987-106736577	+	non-BED genes	No	35.6779	23.9197	20.2802	21.7604	0.692	0.464	0.393	0.422	45.986	51591
ENSMUSG00000021643	Serf1	chr13:100107997-100114571	+	non-BED genes	No	7.4117	7.53471	6.11701	5.53055	1.127	1.146	0.93	0.841	6.2	6575
ENSMUSG00000078532	Nkain1	chr4:130531602-130574173	-	non-BED genes	No	34.9513	45.3279	45.5482	42.2286	0.821	1.065	1.07	0.992	0.817868	42572
ENSMUSG00000028865	Cd164l2	chr4:133212131-133224555	+	non-BED genes	No	13.7335	17.7006	12.4222	10.2341	1.105	1.425	1	0.824	0.111315	12425
ENSMUSG00000028256	Odf2l	chr3:145118589-145153915	+	non-BED genes	No	28.1935	22.3649	18.5863	20.8817	0.798	0.633	0.526	0.591	20.614	35327
ENSMUSG00000038025	Phf2	chr13:48801750-48870885	-	non-BED genes	No	47.0861	62.3109	81.9209	75.2051	0.681	0.901	1.185	1.088	1.58627	69136
ENSMUSG00000032235	Narg2	chr9:69397906-69433122	+	non-BED genes	No	28.7022	30.0192	28.6088	28.5831	0.815	0.852	0.812	0.812	28.2187	35217
ENSMUSG00000018995	Nars2	chr7:96951505-97064761	+	non-BED genes	No	62.7815	68.231	80.3681	88.3854	0.554	0.602	0.71	0.78	116.289	113257
ENSMUSG00000032932	Hspa13	chr16:75755190-75766821	-	non-BED genes	No	12.2802	10.5845	12.5634	10.5959	1.056	0.91	1.08	0.911	13.685	11632
ENSMUSG00000097537	2610020C07Rik	chr16:11203383-11225796	+	non-BED genes	No	16.1314	17.4614	14.3985	15.5062	0.72	0.779	0.642	0.692	43.1209	22414
ENSMUSG00000021728	Emb	chr13:117220625-117274098	+	non-BED genes	No	56.3871	56.2113	44.3718	47.7591	1.054	1.051	0.83	0.893	21.1835	53474
ENSMUSG00000034800	Zfp661	chr2:127574662-127587094	-	non-BED genes	No	14.6781	13.6342	9.26962	10.0273	1.181	1.097	0.746	0.807	11.9201	12433
ENSMUSG00000042133	Ppig	chr2:69722545-69754012	+	non-BED genes	No	34.2973	26.4313	21.2684	23.311	1.09	0.84	0.676	0.741	1.20237	31468
ENSMUSG00000054237	Fra10ac1	chr19:38188481-38224138	-	non-BED genes	No	31.6814	31.9926	21.1272	23.7245	0.888	0.897	0.592	0.665	33.4902	35658
ENSMUSG00000039556	Ppp1r3f	chrX:7557296-7605381	-	non-BED genes	No	39.8197	36.7766	33.7847	30.6506	0.828	0.765	0.703	0.637	4.44795	48086
ENSMUSG00000018583	G3bp1	chr11:55469685-55504838	+	non-BED genes	No	26.0863	31.2152	42.6308	40.3161	0.742	0.888	1.213	1.147	3.86904	35154
ENSMUSG00000021556	Golm1	chr13:59634996-59675784	-	non-BED genes	No	46.7955	50.8294	50.5359	48.0176	1.147	1.246	1.239	1.177	9.48515	40789
ENSMUSG00000032356	Rasgrf1	chr9:89909775-90026976	+	non-BED genes	No	82.8367	86.709	99.3779	97.6891	0.707	0.74	0.848	0.834	10.1125	117202
ENSMUSG00000025019	Lcor	chr19:41482645-41562246	+	non-BED genes	No	63.7261	65.1214	88.3673	90.6596	0.801	0.818	1.11	1.139	19.5207	79602
ENSMUSG00000079426	Arpc4	chr6:113378113-113390448	+	non-BED genes	No	16.2767	14.3518	10.5871	10.5959	1.319	1.163	0.858	0.859	17.3977	12336
ENSMUSG00000029674	Limk1	chr5:134656039-134688590	-	non-BED genes	No	35.5326	35.8198	32.326	31.6844	1.092	1.1	0.993	0.973	4.54343	32552
ENSMUSG00000028248	Sfrs18	chr4:21847583-21876475	+	non-BED genes	No	31.7541	25.8333	32.6084	30.5989	1.099	0.894	1.129	1.059	1.70586	28893
ENSMUSG00000090639	Gm20425	chr9:103190208-103230307	-	non-BED genes	No	28.3389	28.4645	25.8797	24.9133	0.707	0.71	0.645	0.621	7.0744	40100
ENSMUSG00000027742	Cog6	chr3:52982123-53017223	-	non-BED genes	No	42.8716	47.4806	39.7606	41.0398	1.221	1.353	1.133	1.169	5.47312	35101
ENSMUSG00000021750	Fam107a	chr14:8296274-8318023	-	non-BED genes	No	9.73694	8.0729	15.669	17.4703	0.448	0.371	0.72	0.803	0	21750
ENSMUSG00000032218	Ccnb2	chr9:70407689-70421554	-	non-BED genes	No	8.13834	9.38849	10.446	10.2341	0.587	0.677	0.753	0.738	8.50218	13866
ENSMUSG00000049878	Rlf	chr4:121145373-121215084	-	non-BED genes	No	49.1934	50.65	68.3223	72.4657	0.706	0.727	0.98	1.04	27.134	69712
ENSMUSG00000074629	4930518I15Rik	chr2:156856616-156857946	-	non-BED genes	No	1.01729	1.43518	1.17635	1.03375	0.764	1.078	0.884	0.777	0.627519	1331
ENSMUSG00000025207	Sema4g	chr19:44989101-45003397	+	non-BED genes	No	10.3183	12.1991	12.0929	12.8185	0.722	0.853	0.846	0.897	1.70574	14297
ENSMUSG00000035277	Arx	chrX:93286507-93298357	+	non-BED genes	No	3.19721	1.67438	4.28191	4.60018	0.27	0.141	0.361	0.388	39.0449	11851
ENSMUSG00000057691	Zfp746	chr6:48062395-48086593	-	non-BED genes	No	20.6365	27.3881	23.1976	20.83	0.853	1.132	0.959	0.861	1.74395	24199
ENSMUSG00000019256	Ahr	chr12:35497974-35535038	-	non-BED genes	No	25.505	29.5409	24.6563	26.2055	0.688	0.797	0.665	0.707	10.1514	37065
ENSMUSG00000067931	Zfp948	chr17:21567046-21588697	+	non-BED genes	No	17.73	16.2654	18.9157	17.8838	0.819	0.751	0.874	0.826	34.9967	21652
ENSMUSG00000018765	Fxr2	chr11:69632990-69653297	+	non-BED genes	No	14.8961	16.983	19.1039	20.3131	0.734	0.836	0.941	1	1.92057	20308
ENSMUSG00000044864	Ankrd50	chr3:38449261-38484844	-	non-BED genes	No	28.5569	31.0956	45.407	45.7433	0.803	0.874	1.276	1.286	23.2633	35584
ENSMUSG00000031166	Wdr13	chrX:8123301-8132892	-	non-BED genes	No	10.2456	8.4317	4.1878	3.2563	1.068	0.879	0.437	0.339	2.17701	9592
ENSMUSG00000028329	Xpa	chr4:46155347-46196311	-	non-BED genes	No	36.4045	45.9857	32.1378	31.8911	0.889	1.123	0.785	0.778	11.0238	40965
ENSMUSG00000033610	Pank1	chr19:34810894-34879455	-	non-BED genes	No	45.8508	46.1053	60.7937	61.9215	0.669	0.672	0.887	0.903	10.4653	68562
ENSMUSG00000090663	Srcap	chr7:127559386-127565266	+	non-BED genes	No	3.26987	4.66434	3.29377	2.99787	0.556	0.793	0.56	0.51	0.961751	5881
ENSMUSG00000032413	Rasa2	chr9:96539300-96631617	-	non-BED genes	No	54.8611	61.5335	64.7932	69.5712	0.594	0.667	0.702	0.754	2.42681	92318
ENSMUSG00000031403	Dkc1	chrX:75095854-75109777	+	non-BED genes	No	7.19371	7.71411	7.43452	7.90817	0.517	0.554	0.534	0.568	19.5816	13924
ENSMUSG00000004070	Hmox2	chr16:4726361-4766742	+	non-BED genes	No	40.619	42.0389	40.7487	37.525	1.006	1.041	1.009	0.929	19.9857	40382
ENSMUSG00000032078	Zfp259	chr9:46273064-46282643	+	non-BED genes	No	9.01031	11.5413	9.50489	7.39129	0.941	1.205	0.992	0.772	6.17146	9580
ENSMUSG00000042105	Inpp5f	chr7:128611328-128696425	+	non-BED genes	No	90.6117	76.6627	74.9098	79.7019	1.065	0.901	0.88	0.937	4.28126	85098
ENSMUSG00000031592	Pcm1	chr8:41239759-41334086	+	non-BED genes	No	87.3418	86.7688	90.6258	91.0731	0.926	0.92	0.961	0.965	28.7207	94328
ENSMUSG00000026017	Carf	chr1:60098247-60151032	+	non-BED genes	No	22.4531	17.2222	19.9509	23.1043	0.425	0.326	0.378	0.438	51.2831	52786
ENSMUSG00000025027	Xpnpep1	chr19:52943417-53040214	-	non-BED genes	No	76.0063	84.3768	86.0146	85.1808	0.785	0.872	0.889	0.88	0.0919142	96798
ENSMUSG00000029474	Rnf34	chr5:122850188-122868945	+	non-BED genes	No	23.2524	22.1257	24.2328	22.1739	1.24	1.18	1.292	1.182	7.51373	18758
ENSMUSG00000044835	Ankrd45	chr1:161142691-161169106	+	non-BED genes	No	20.2732	14.1724	15.9042	16.2298	0.767	0.537	0.602	0.614	5.06173	26416
ENSMUSG00000075307	Klhl41	chr2:69670120-69684230	+	non-BED genes	No	9.66428	7.65431	14.1632	10.6476	0.685	0.542	1.004	0.755	1.51427	14111
ENSMUSG00000037035	Inhbb	chr1:119415465-119422248	-	non-BED genes	No	7.12105	7.11612	7.95211	8.1666	1.05	1.049	1.172	1.204	2.17483	6784
ENSMUSG00000017692	Rhbdl3	chr11:80300912-80355955	+	non-BED genes	No	35.5326	43.9525	44.3718	44.968	0.646	0.798	0.806	0.817	3.42283	55044
ENSMUSG00000035297	Cops4	chr5:100518309-100547803	+	non-BED genes	No	27.2489	27.9861	28.3735	27.3426	0.924	0.949	0.962	0.927	29.6107	29495
ENSMUSG00000041132	N4bp2l1	chr5:150571643-150594525	-	non-BED genes	No	28.1935	27.0891	26.6796	23.9312	1.232	1.184	1.166	1.046	4.61937	22883
ENSMUSG00000023284	Zfp605	chr5:110110092-110129794	+	non-BED genes	No	17.73	14.0528	12.2811	11.8881	0.9	0.713	0.623	0.603	20.5353	19703
ENSMUSG00000044813	Shb	chr4:45423278-45532470	-	non-BED genes	No	121.13	116.908	138.621	135.266	1.109	1.071	1.27	1.239	0	109193
ENSMUSG00000022747	St3gal6	chr16:58468125-58524243	-	non-BED genes	No	48.6121	48.0188	52.5122	54.1684	0.866	0.856	0.936	0.965	0.449472	56119
ENSMUSG00000048482	Bdnf	chr2:109674700-109727007	+	non-BED genes	No	73.9717	58.3641	53.1239	56.3909	1.414	1.116	1.016	1.078	0.311768	52308
ENSMUSG00000057858	D19Ertd737e	chr19:60198586-60226697	-	non-BED genes	No	14.4601	12.7372	20.4214	20.4682	0.514	0.453	0.726	0.728	43.7531	28112
ENSMUSG00000030452	Nipa2	chr7:55931287-55962476	-	non-BED genes	No	20.5638	21.9463	21.1272	21.8638	0.659	0.704	0.677	0.701	20.5719	31190
ENSMUSG00000020064	Herc4	chr10:63243797-63317881	+	non-BED genes	No	68.6673	78.4567	63.0522	63.8856	0.927	1.059	0.851	0.862	10.7544	74085
ENSMUSG00000024579	Pcyox1l	chr18:61696837-61707635	-	non-BED genes	No	11.9169	15.9664	8.4697	8.42504	1.104	1.479	0.784	0.78	1.2424	10799
ENSMUSG00000061607	Mdc1	chr17:35841515-35859670	+	non-BED genes	No	14.9687	18.2986	13.6456	12.0432	0.824	1.008	0.752	0.663	10.6079	18156
ENSMUSG00000021448	Shc3	chr13:51431041-51567084	-	non-BED genes	No	152.158	172.043	165.865	157.13	1.118	1.265	1.219	1.155	1.13039	136044
ENSMUSG00000028691	Prdx1	chr4:116685544-116700822	+	non-BED genes	No	10.3183	11.7207	15.9042	13.9039	0.675	0.767	1.041	0.91	30.1621	15279
ENSMUSG00000002763	Pex6	chr17:46711463-46725541	+	non-BED genes	No	10.4636	9.50809	12.6104	11.9915	0.743	0.675	0.896	0.852	2.58823	14079
ENSMUSG00000062040	Zfp27	chr7:29893333-29906572	-	non-BED genes	No	10.6816	9.86688	7.52863	7.28792	0.807	0.745	0.569	0.55	6.05763	13240
ENSMUSG00000028821	Syf2	chr4:134930898-134937548	+	non-BED genes	No	5.74044	7.17592	6.21112	6.30586	0.863	1.079	0.934	0.948	23.2798	6651
ENSMUSG00000025234	Arih1	chr9:59388258-59486618	-	non-BED genes	No	67.1413	70.5034	103.189	101.204	0.683	0.717	1.049	1.029	17.2448	98361
ENSMUSG00000046027	Stard5	chr7:83631959-83653127	+	non-BED genes	No	10.7542	11.2423	16.7041	18.349	0.508	0.531	0.789	0.867	16.8453	21169
ENSMUSG00000026307	Scly	chr1:91298338-91321075	+	non-BED genes	No	14.7507	15.787	13.6456	14.9376	0.649	0.694	0.6	0.657	16.8439	22738
ENSMUSG00000057835	Zfp119a	chr17:55865204-55878862	-	non-BED genes	No	6.97572	5.20254	7.52863	8.73516	0.511	0.381	0.551	0.64	2.07155	13659
ENSMUSG00000044148	1810030O07Rik	chrX:12654879-12673668	-	non-BED genes	No	14.0968	16.4448	13.2221	11.8881	0.75	0.875	0.704	0.633	9.70722	18790
ENSMUSG00000097392	D930016D06Rik	chr5:104525735-104554211	+	non-BED genes	No	13.1521	10.5247	14.2103	12.7668	0.462	0.37	0.499	0.448	1.56105	28477
ENSMUSG00000029427	Zcchc8	chr5:123698302-123721044	-	non-BED genes	No	20.1279	21.9463	21.9742	18.349	0.885	0.965	0.966	0.807	51.3273	22743
ENSMUSG00000029686	Cul1	chr6:47453398-47526139	+	non-BED genes	No	53.8439	58.4837	65.6402	68.3824	0.74	0.804	0.902	0.94	0.211592	72742
ENSMUSG00000045427	Hnrnph2	chrX:134601179-134607060	+	non-BED genes	No	4.94114	4.66434	4.61128	5.01367	0.84	0.793	0.784	0.852	18.3524	5882
ENSMUSG00000056342	Usp34	chr11:23306895-23490560	+	non-BED genes	No	148.525	159.963	144.361	144.311	0.809	0.871	0.786	0.786	1.96059	183666
ENSMUSG00000035891	Cerk	chr15:86139128-86186141	-	non-BED genes	No	51.6639	53.8792	53.6885	49.8266	1.099	1.146	1.142	1.06	0.609978	47014
ENSMUSG00000031951	Tmem231	chr8:111912018-111933791	-	non-BED genes	No	17.0033	15.3086	18.1158	15.4545	0.781	0.703	0.832	0.71	27.943	21774
ENSMUSG00000022247	Brix1	chr15:10474779-10485947	-	non-BED genes	No	9.08297	9.50809	7.62273	8.1666	0.813	0.851	0.682	0.731	16.2633	11169
ENSMUSG00000020074	Ccar1	chr10:62743928-62792368	-	non-BED genes	No	34.0793	35.3414	36.9373	36.0261	0.704	0.73	0.763	0.744	10.898	48441
ENSMUSG00000033972	Zfp944	chr17:22337989-22361400	-	non-BED genes	No	9.51895	10.1061	13.5515	15.9197	0.407	0.432	0.579	0.68	0.792504	23412
ENSMUSG00000050079	Rspry1	chr8:94601955-94660275	+	non-BED genes	No	38.8025	35.461	38.0666	38.2486	0.665	0.608	0.653	0.656	18.101	58321
ENSMUSG00000020024	Ccdc41	chr10:94688790-94790336	+	non-BED genes	No	58.8577	60.6963	71.8513	77.0659	0.58	0.598	0.708	0.759	3.52038	101547
ENSMUSG00000027520	Zdbf2	chr1:63273265-63314576	+	non-BED genes	No	13.0795	12.3785	17.2688	20.0547	0.317	0.3	0.418	0.485	1.76633	41312
ENSMUSG00000056763	Cspp1	chr1:10038218-10136768	+	non-BED genes	No	89.5218	93.7055	88.179	88.282	0.908	0.951	0.895	0.896	4.90746	98551
ENSMUSG00000055917	Zfp277	chr12:40315046-40445790	-	non-BED genes	No	118.66	112.961	116.176	122.913	0.908	0.864	0.889	0.94	17.1628	130745
ENSMUSG00000031527	Eri1	chr8:35465265-35495533	-	non-BED genes	No	13.9514	12.4981	11.4812	14.5241	0.461	0.413	0.379	0.48	19.5459	30269
ENSMUSG00000028221	Tmem55a	chr4:14864076-14915176	+	non-BED genes	No	37.7125	34.5042	35.3845	35.871	0.738	0.675	0.692	0.702	5.10824	51101
ENSMUSG00000024507	Hsd17b4	chr18:50128201-50196269	+	non-BED genes	No	46.7955	47.6002	56.8411	54.892	0.687	0.699	0.835	0.806	9.26262	68069
ENSMUSG00000003809	Gcdh	chr8:84886393-84893921	-	non-BED genes	No	6.46708	9.02969	5.69352	4.75524	0.859	1.199	0.756	0.632	2.28901	7529
ENSMUSG00000047518	Slfnl1	chr4:120532231-120536661	+	non-BED genes	No	3.19721	3.46836	3.34083	2.53268	0.722	0.783	0.754	0.572	1.81548	4431
ENSMUSG00000091854	Mier2	chr10:79540246-79541960	-	non-BED genes	No	0.799301	1.25579	0.658755	0.930373	0.466	0.732	0.384	0.542	1.00919	1715
ENSMUSG00000039754	Alkbh4	chr5:136136146-136141615	+	non-BED genes	No	5.74044	6.33872	6.49344	6.5643	1.049	1.159	1.187	1.2	37.3287	5470
ENSMUSG00000097908	4933404O12Rik	chr5:136919146-136937112	+	non-BED genes	No	22.0171	20.9298	11.2929	11.3712	1.225	1.165	0.629	0.633	23.4356	17967
ENSMUSG00000032115	Hyou1	chr9:44379490-44392369	+	non-BED genes	No	13.9514	15.6674	10.1166	8.5801	1.083	1.216	0.785	0.666	10.1375	12880
ENSMUSG00000020523	Fam114a2	chr11:57482993-57518617	-	non-BED genes	No	15.6954	19.1956	21.9271	19.8479	0.441	0.539	0.615	0.557	19.3827	35625
ENSMUSG00000025869	Nop16	chr13:54584185-54590090	-	non-BED genes	No	5.15913	5.56133	6.35228	5.3238	0.874	0.942	1.076	0.901	9.6041	5906
ENSMUSG00000025980	Hspd1	chr1:55077835-55088243	-	non-BED genes	No	12.7888	14.2322	13.0339	12.2499	1.229	1.367	1.252	1.177	0.631946	10409
ENSMUSG00000022636	Alcam	chr16:52248996-52454074	-	non-BED genes	No	175.628	153.086	159.372	173.566	0.856	0.746	0.777	0.846	1.68836	205079
ENSMUSG00000027080	Med19	chr2:84678402-84688215	+	non-BED genes	No	8.71965	12.0795	7.81095	9.51047	0.888	1.231	0.796	0.969	26.1354	9814
ENSMUSG00000025940	Tmem70	chr1:16665207-16678275	+	non-BED genes	No	15.8407	16.8634	17.5511	16.1265	1.212	1.29	1.343	1.234	15.0463	13069
ENSMUSG00000079165	Sap25	chr5:137641334-137642902	+	non-BED genes	No	0.726638	1.55478	0.517593	1.03375	0.463	0.991	0.33	0.659	1.99111	1569
ENSMUSG00000006494	Pdk1	chr2:71873224-71903858	+	non-BED genes	No	32.19	32.6504	31.9496	31.4776	1.051	1.066	1.043	1.028	11.0318	30635
ENSMUSG00000025142	Aspscr1	chr11:120672973-120709447	+	non-BED genes	No	22.6711	28.8233	29.2205	28.0662	0.622	0.79	0.801	0.769	2.20996	36475
ENSMUSG00000030493	C230052I12Rik	chr7:35392275-35396817	-	non-BED genes	No	4.65048	4.66434	3.95253	2.68774	1.024	1.027	0.87	0.592	91.1666	4543
ENSMUSG00000068523	Gng5	chr3:146499834-146505572	+	non-BED genes	No	5.15913	6.57792	4.09369	5.16874	0.899	1.146	0.713	0.901	0.140668	5739
ENSMUSG00000028879	Stx12	chr4:132853501-132884509	-	non-BED genes	No	34.0793	42.4575	36.1845	36.4913	1.099	1.369	1.167	1.177	12.2094	31009
ENSMUSG00000042670	Immp1l	chr2:105904638-105965558	+	non-BED genes	No	26.0863	25.7137	34.6787	34.217	0.428	0.422	0.569	0.562	37.0369	60921
ENSMUSG00000022120	Rnf219	chr14:104477534-104522666	-	non-BED genes	No	19.0379	16.983	22.0212	25.7403	0.422	0.376	0.488	0.57	19.9997	45133
ENSMUSG00000097375	6720427I07Rik	chr13:48535523-48537822	-	non-BED genes	No	1.45328	1.13619	1.92921	1.91243	0.632	0.494	0.839	0.831	0.812366	2300
ENSMUSG00000068551	Zfp467	chr6:48427697-48445825	-	non-BED genes	No	15.0414	15.787	17.2688	15.6096	0.83	0.871	0.953	0.861	0.515114	18129
ENSMUSG00000018042	Cyb5r3	chr15:83153494-83172592	-	non-BED genes	No	15.1141	14.591	16.563	14.886	0.791	0.764	0.867	0.779	0.72673	19099
ENSMUSG00000031858	Mau2	chr8:70016123-70042734	-	non-BED genes	No	25.2143	28.5841	27.2913	24.6032	0.947	1.074	1.026	0.925	9.6579	26612
ENSMUSG00000040260	Daam2	chr17:49456022-49564337	-	non-BED genes	No	60.5289	75.5863	92.3668	91.4349	0.559	0.698	0.853	0.844	10.901	108316
ENSMUSG00000012211	Tex22	chr12:113074502-113088917	+	non-BED genes	No	17.6573	15.7272	9.97543	7.85648	1.225	1.091	0.692	0.545	75.2076	14416
ENSMUSG00000042808	Gpx2	chr12:76792335-76795554	-	non-BED genes	No	1.23528	2.39197	1.45867	1.2405	0.384	0.743	0.453	0.385	3.24163	3220
ENSMUSG00000046079	Lrrc8d	chr5:105699969-105832436	+	non-BED genes	No	108.124	130.841	163.936	161.988	0.816	0.988	1.238	1.223	3.51361	132468
ENSMUSG00000061175	Fnip2	chr3:79455971-79567796	-	non-BED genes	No	99.84	106.622	114.106	115.78	0.893	0.953	1.02	1.035	3.21173	111826
ENSMUSG00000035150	Eif2s3x	chrX:94188707-94212862	-	non-BED genes	No	10.2456	7.11612	6.58755	5.68561	0.424	0.295	0.273	0.235	6.51269	24156
ENSMUSG00000054079	Utp18	chr11:93859243-93885766	-	non-BED genes	No	20.7818	19.7338	20.8449	20.7783	0.784	0.744	0.786	0.783	0.460068	26524
ENSMUSG00000041375	Ccdc9	chr7:16274042-16286795	-	non-BED genes	No	10.3183	12.3187	9.83427	9.71722	0.809	0.966	0.771	0.762	0.516004	12754
ENSMUSG00000043183	Simc1	chr13:54503779-54551290	+	non-BED genes	No	26.4496	30.1388	30.7733	29.5135	0.557	0.634	0.648	0.621	88.6108	47512
ENSMUSG00000052957	Gas1	chr13:60174405-60177365	-	non-BED genes	No	3.70585	3.64776	2.49386	1.39556	1.252	1.232	0.842	0.471	1.01031	2961
ENSMUSG00000030750	Nsmce1	chr7:125467640-125491596	-	non-BED genes	No	23.2524	22.8433	21.4566	21.1401	0.971	0.954	0.896	0.882	55.977	23957
ENSMUSG00000064030	Wibg	chr10:128747879-128766568	+	non-BED genes	No	23.6884	21.6473	22.4918	24.8099	1.267	1.158	1.203	1.327	1.4125	18690
ENSMUSG00000020170	Frs2	chr10:117070129-117148474	-	non-BED genes	No	64.0894	67.6928	88.6966	88.1786	0.818	0.864	1.132	1.126	15.9374	78346
ENSMUSG00000002413	Braf	chr6:39603237-39725463	-	non-BED genes	Yes	124.473	127.851	139.28	136.351	1.018	1.046	1.14	1.116	1.16386	122227
ENSMUSG00000022538	Lsg1	chr16:30560494-30587592	-	non-BED genes	No	14.5328	15.787	14.6338	14.2657	0.536	0.583	0.54	0.526	17.765	27099
ENSMUSG00000002845	Tmem39a	chr16:38558698-38592162	+	non-BED genes	No	26.3769	28.6439	29.8322	29.4101	0.788	0.856	0.891	0.879	0	33465
ENSMUSG00000031862	Atp13a1	chr8:69791163-69807749	+	non-BED genes	No	14.5328	17.2222	14.5397	12.405	0.876	1.038	0.877	0.748	4.88229	16587
ENSMUSG00000007833	Aldh16a1	chr7:45140684-45154584	-	non-BED genes	No	14.6781	12.4383	6.06995	7.13286	1.056	0.895	0.437	0.513	0.790291	13901
ENSMUSG00000035696	Rnf38	chr4:44126210-44233789	-	non-BED genes	No	92.8643	104.41	128.128	121.827	0.863	0.971	1.191	1.132	0.308528	107580
ENSMUSG00000028577	Plaa	chr4:94567514-94603244	-	non-BED genes	No	30.8094	22.1855	23.1035	26.1538	0.862	0.621	0.647	0.732	17.1544	35731
ENSMUSG00000011158	Brf1	chr12:112959862-113000621	-	non-BED genes	No	48.9027	54.7762	49.3125	43.8826	1.2	1.344	1.21	1.077	8.08084	40760
ENSMUSG00000020954	Strn3	chr12:51608541-51691914	-	non-BED genes	No	64.5254	76.3039	81.2621	77.4794	0.774	0.915	0.975	0.929	5.01668	83374
ENSMUSG00000008976	Gabpa	chr16:84834925-84863779	+	non-BED genes	No	23.0344	23.2021	13.5986	18.5558	0.798	0.804	0.471	0.643	2.09518	28855
ENSMUSG00000002455	Prpf6	chr2:181591868-181655660	+	non-BED genes	No	80.5115	78.5763	59.6644	56.7527	1.262	1.232	0.935	0.89	0.515997	63793
ENSMUSG00000034377	Tulp4	chr17:6106437-6251128	+	non-BED genes	No	104.273	112.781	143.044	145.448	0.721	0.779	0.989	1.005	1.52859	144692
ENSMUSG00000037007	Zfp113	chr5:138139702-138155744	-	non-BED genes	No	14.5328	14.4714	8.4697	8.68348	0.906	0.902	0.528	0.541	14.8775	16043
ENSMUSG00000023505	Cdca3	chr6:124829547-124833701	+	non-BED genes	No	3.85118	3.94675	1.97626	2.8428	0.927	0.95	0.476	0.684	504.902	4155
ENSMUSG00000023921	Mut	chr17:40934685-40961989	+	non-BED genes	No	17.8026	15.0694	15.3866	16.9018	0.652	0.552	0.564	0.619	231.606	27305
ENSMUSG00000092310	Gm20509	chr9:73102470-73117920	+	non-BED genes	No	11.0449	11.0031	9.69311	8.52841	0.715	0.712	0.627	0.552	1.91975	15451
ENSMUSG00000041236	Vps41	chr13:18717292-18866809	+	non-BED genes	No	121.712	127.193	135.139	140.228	0.814	0.851	0.904	0.938	11.0276	149518
ENSMUSG00000031386	Hcfc1	chrX:73942792-73966357	-	non-BED genes	No	20.7092	21.3483	13.3163	15.6096	0.879	0.906	0.565	0.662	4.6576	23566
ENSMUSG00000028771	Ptpn12	chr5:20986645-21055911	-	non-BED genes	No	59.439	58.4837	71.7102	76.3939	0.858	0.844	1.035	1.103	1.97187	69267
ENSMUSG00000061371	Zfp873	chr10:82058417-82061329	+	non-BED genes	No	0.871965	0.179398	0.799917	0.98206	0.299	0.062	0.275	0.337	0.841949	2913
ENSMUSG00000004565	Pnpla6	chr8:3515384-3544266	+	non-BED genes	No	30.1555	28.7635	15.1984	16.2815	1.044	0.996	0.526	0.564	23.1129	28883
ENSMUSG00000053510	Nrd1	chr4:109000655-109061777	+	non-BED genes	No	55.6604	57.2877	62.9111	63.989	0.911	0.937	1.029	1.047	6.9923	61123
ENSMUSG00000022673	Mcm4	chr16:15623897-15637400	-	non-BED genes	No	6.32175	7.23571	7.71684	7.23623	0.468	0.536	0.571	0.536	73.9376	13504
ENSMUSG00000020448	Rnf185	chr11:3415982-3452363	-	non-BED genes	No	34.588	36.1188	40.137	40.006	0.951	0.993	1.103	1.1	15.77	36382
ENSMUSG00000038658	C030046E11Rik	chr19:29522282-29606829	+	non-BED genes	No	43.5983	42.2781	48.5126	54.6335	0.516	0.5	0.574	0.646	6.92742	84548
ENSMUSG00000008393	Carhsp1	chr16:8658587-8672153	-	non-BED genes	No	6.17642	5.44174	7.52863	8.63179	0.455	0.401	0.555	0.636	13.3146	13567
ENSMUSG00000032940	Rbm11	chr16:75592844-75602829	+	non-BED genes	No	8.86498	6.75732	5.78763	6.51261	0.888	0.677	0.58	0.652	102.178	9986
ENSMUSG00000060397	Zfp128	chr7:12881177-12893422	+	non-BED genes	No	13.8061	14.591	13.7868	10.6476	1.127	1.191	1.126	0.869	9.07742	12246
ENSMUSG00000074282	Zfp94	chr7:24301704-24316666	-	non-BED genes	No	13.0795	12.6177	9.41078	7.33961	0.874	0.843	0.629	0.491	15.9002	14963
ENSMUSG00000043388	Tmem130	chr5:144735915-144761649	-	non-BED genes	No	30.2281	34.1454	24.0446	20.8817	1.175	1.327	0.934	0.811	3.15311	25735
ENSMUSG00000021097	Clmn	chr12:104763114-104865076	-	non-BED genes	No	80.5841	93.7653	86.2498	94.4845	0.79	0.92	0.846	0.927	1.52078	101963
ENSMUSG00000000167	Pih1d2	chr9:50617321-50625000	+	non-BED genes	No	7.99301	6.51812	3.99958	3.97993	1.041	0.849	0.521	0.518	6.58043	7680
ENSMUSG00000025474	Tubgcp2	chr7:139995955-140036350	-	non-BED genes	No	39.6018	40.1253	29.4558	32.5114	0.98	0.993	0.729	0.805	12.8806	40396
ENSMUSG00000020514	Mrpl22	chr11:58171661-58179565	+	non-BED genes	No	9.51895	10.1061	7.01103	6.30586	1.204	1.278	0.887	0.798	16.8347	7905
ENSMUSG00000027676	Ccdc39	chr3:33812362-33844310	-	non-BED genes	No	20.2005	21.4081	19.0098	20.5199	0.632	0.67	0.595	0.642	18.2007	31949
ENSMUSG00000029110	Rnf4	chr5:34336289-34355629	+	non-BED genes	No	12.7888	16.086	15.4807	15.2478	0.661	0.832	0.8	0.788	9.80035	19341
ENSMUSG00000025237	Parp6	chr9:59617284-59650290	+	non-BED genes	No	27.1762	32.4112	25.315	24.4998	0.823	0.982	0.767	0.742	3.63581	33007
ENSMUSG00000042523	Dnal1	chr12:84114366-84147498	+	non-BED genes	No	27.1036	30.7966	27.4795	26.5156	0.818	0.929	0.829	0.8	5.55091	33133
ENSMUSG00000053012	Krcc1	chr6:71272019-71285318	+	non-BED genes	No	10.8996	9.50809	7.95211	9.76891	0.82	0.715	0.598	0.735	2.12037	13300
ENSMUSG00000000787	Ddx3x	chrX:13280970-13294052	+	non-BED genes	No	9.2283	9.62769	6.77576	7.49467	0.705	0.736	0.518	0.573	20.3953	13083
ENSMUSG00000066551	Hmgb1	chr5:149046702-149053513	-	non-BED genes	No	7.04839	6.45832	5.69352	5.89236	1.035	0.948	0.836	0.865	0.139281	6812
ENSMUSG00000040040	Ift88	chr14:57424062-57517936	+	non-BED genes	No	91.411	95.0809	83.2854	85.0774	0.974	1.013	0.887	0.906	8.75059	93875
ENSMUSG00000020260	Pofut2	chr10:77259300-77269586	+	non-BED genes	No	7.48437	9.26889	7.05809	6.40923	0.728	0.901	0.686	0.623	54.9997	10287
ENSMUSG00000030386	Zfp606	chr7:12478293-12496235	+	non-BED genes	No	23.4704	21.2287	17.5511	17.1602	1.308	1.183	0.978	0.956	6.96637	17943
ENSMUSG00000025580	Eif4a3	chr11:119288363-119300089	-	non-BED genes	No	9.08297	11.3619	7.90506	8.42504	0.775	0.969	0.674	0.718	7.70878	11727
ENSMUSG00000031847	1700030J22Rik	chr8:116969599-116978943	-	non-BED genes	No	6.32175	10.0463	7.2463	6.66767	0.676	1.075	0.775	0.714	15.7063	9345
ENSMUSG00000030871	Ears2	chr7:122037213-122067263	-	non-BED genes	No	22.3804	19.0162	21.833	20.1064	0.745	0.633	0.727	0.669	3.10831	30051
ENSMUSG00000004610	Etfb	chr7:43444108-43457800	+	non-BED genes	No	10.3183	8.3719	12.4222	12.9735	0.754	0.611	0.907	0.947	11.4854	13693
ENSMUSG00000039632	Ccdc151	chr9:21989871-22002634	-	non-BED genes	No	9.59162	10.1061	7.858	8.63179	0.751	0.792	0.616	0.676	75.2957	12764
ENSMUSG00000020988	L2hgdh	chr12:69690436-69724874	-	non-BED genes	No	17.1486	18.0594	14.5867	17.3153	0.498	0.524	0.424	0.503	11.2571	34439
ENSMUSG00000048029	Eno4	chr19:58943425-58971419	+	non-BED genes	No	19.9825	17.88	13.5986	15.4545	0.714	0.639	0.486	0.552	4.00597	27995
ENSMUSG00000066456	Hmgn3	chr9:83109948-83146607	-	non-BED genes	No	37.2038	40.7233	35.1493	34.7856	1.015	1.111	0.959	0.949	12.6055	36660
ENSMUSG00000009292	Trpm2	chr10:77907722-77970563	-	non-BED genes	No	38.0758	40.2449	50.0654	50.8604	0.606	0.64	0.797	0.809	0.523524	62842
ENSMUSG00000024077	Strn	chr17:78649913-78737196	-	non-BED genes	No	56.8957	79.9517	78.7683	81.3042	0.652	0.916	0.902	0.931	0.92507	87284
ENSMUSG00000027835	Pdcd10	chr3:75516490-75556856	-	non-BED genes	No	31.2454	33.368	36.655	37.2149	0.774	0.827	0.908	0.922	4.39963	40367
ENSMUSG00000040123	Zmym5	chr14:56790585-56811716	-	non-BED genes	No	12.1348	14.7106	15.9513	17.4703	0.574	0.696	0.755	0.827	0	21132
ENSMUSG00000026718	Stam	chr2:14074100-14148338	+	non-BED genes	No	56.0238	55.6731	57.2176	61.1978	0.755	0.75	0.771	0.824	8.07279	74239
ENSMUSG00000022948	Setd4	chr16:93583457-93604063	-	non-BED genes	No	20.0552	19.1956	17.5982	17.4703	0.973	0.932	0.854	0.848	22.2787	20607
ENSMUSG00000028032	Papss1	chr3:131564768-131643670	+	non-BED genes	No	61.2556	69.0682	82.6737	86.1628	0.776	0.875	1.048	1.092	23.5928	78903
ENSMUSG00000028034	Fubp1	chr3:152210458-152236830	+	non-BED genes	No	23.3977	23.9795	26.3031	28.6865	0.887	0.909	0.997	1.088	4.89379	26373
ENSMUSG00000034826	Nup54	chr5:92415540-92435219	-	non-BED genes	No	11.1902	13.993	14.1632	14.8343	0.569	0.711	0.72	0.754	27.7937	19680
ENSMUSG00000096364	Gpr45	chr1:42953139-43030781	+	non-BED genes	No	56.8231	52.2048	61.3583	62.4383	0.732	0.672	0.79	0.804	4.29662	77643
ENSMUSG00000054263	Lifr	chr15:7129559-7197489	+	non-BED genes	No	53.0446	62.0119	67.193	67.0385	0.781	0.913	0.989	0.987	32.8985	67931
ENSMUSG00000041846	Smek1	chr12:101039409-101083702	-	non-BED genes	No	41.8543	42.2183	48.7008	50.6019	0.945	0.953	1.099	1.142	4.43292	44294
ENSMUSG00000030056	Isy1	chr6:87818447-87838759	-	non-BED genes	No	18.7473	15.6076	11.7635	11.8364	0.923	0.768	0.579	0.583	21.8111	20313
ENSMUSG00000028252	Ccnc	chr4:21727701-21759922	+	non-BED genes	No	24.197	27.1489	20.1861	22.9492	0.751	0.843	0.626	0.712	18.3984	32222
ENSMUSG00000003316	Glg1	chr8:111154421-111259216	-	non-BED genes	No	83.5633	93.4065	122.105	118.778	0.797	0.891	1.165	1.133	11.9018	104796
ENSMUSG00000046111	5830418K08Rik	chr9:15316915-15357788	-	non-BED genes	No	31.8267	30.6172	30.7733	31.5293	0.779	0.749	0.753	0.771	5.41232	40874
ENSMUSG00000066279	Chrna10	chr7:102111266-102116713	-	non-BED genes	No	2.3979	1.67438	2.58797	3.15293	0.44	0.307	0.475	0.579	16.6483	5448
ENSMUSG00000025280	Polr3a	chr14:24448694-24487046	-	non-BED genes	No	21.6538	24.6971	26.1149	25.792	0.565	0.644	0.681	0.672	7.69354	38353
ENSMUSG00000048148	Nwd1	chr8:72646711-72714746	+	non-BED genes	No	39.6018	43.5339	46.1128	45.4849	0.582	0.64	0.678	0.669	5.69322	68036
ENSMUSG00000097847	4930478K11Rik	chr12:108313779-108328030	-	non-BED genes	No	14.4601	16.4448	15.9042	12.9735	1.015	1.154	1.116	0.91	8.49795	14252
ENSMUSG00000027272	Ubr1	chr2:120860269-120970715	-	non-BED genes	No	97.8781	93.4065	92.8844	90.1428	0.886	0.846	0.841	0.816	18.0843	110447
ENSMUSG00000026280	Atg4b	chr1:93751500-93789434	+	non-BED genes	No	24.9963	27.9263	37.5961	33.3383	0.659	0.736	0.991	0.879	0.0630622	37935
ENSMUSG00000026309	Ilkap	chr1:91375831-91398783	-	non-BED genes	No	23.0344	26.3715	30.9144	28.4797	1.004	1.149	1.347	1.241	1.8122	22953
ENSMUSG00000027499	Pkia	chr3:7366604-7445366	+	non-BED genes	No	90.3937	89.1009	92.9785	94.6912	1.148	1.131	1.18	1.202	7.90201	78763
ENSMUSG00000009555	Cdk9	chr2:32705784-32713076	-	non-BED genes	No	4.72314	6.33872	6.77576	6.61598	0.648	0.869	0.929	0.907	1.21429	7293
ENSMUSG00000034105	Tldc1	chr8:119760587-119778416	-	non-BED genes	No	21.1452	20.6308	14.3514	13.6972	1.186	1.157	0.805	0.768	9.07789	17830
ENSMUSG00000074622	Mafb	chr2:160363677-160367065	-	non-BED genes	No	1.38061	1.97338	3.24672	3.20462	0.407	0.582	0.958	0.946	9.90858	3389
ENSMUSG00000028218	Fam92a	chr4:12153409-12172015	-	non-BED genes	No	18.6746	18.9564	15.0102	15.6096	1.004	1.019	0.807	0.839	9.34686	18607
ENSMUSG00000017858	Ift52	chr2:163017354-163046141	+	non-BED genes	No	20.2005	17.8202	13.4104	14.7826	0.702	0.619	0.466	0.513	31.1924	28788
ENSMUSG00000020738	Sumo2	chr11:115523102-115536276	-	non-BED genes	No	10.8996	14.2322	16.6571	16.3332	0.827	1.08	1.264	1.24	0.400305	13175
ENSMUSG00000021982	Cdadc1	chr14:59560896-59597836	-	non-BED genes	No	25.2143	21.5277	27.056	25.792	0.683	0.583	0.732	0.698	14.4159	36941
ENSMUSG00000021974	Fgf9	chr14:58070547-58112337	+	non-BED genes	No	52.6812	51.248	40.6546	40.4712	1.261	1.226	0.973	0.968	0.877572	41791
ENSMUSG00000050855	Zfp940	chr7:29833620-29853669	-	non-BED genes	No	16.7853	16.983	13.7397	13.7488	0.837	0.847	0.685	0.686	7.35516	20050
ENSMUSG00000031505	Carkd	chr8:11497506-11514960	+	non-BED genes	No	17.6573	24.0991	19.7156	20.5199	1.012	1.381	1.13	1.176	10.2528	17455
ENSMUSG00000098598	POU6F1	chr15:100578273-100584075	-	non-BED genes	No	2.3979	4.84374	4.32896	3.04955	0.413	0.835	0.746	0.526	0.844237	5803
ENSMUSG00000031838	Ifi30	chr8:70762774-70766663	-	non-BED genes	No	3.34253	4.18595	4.84655	5.22042	0.859	1.076	1.246	1.342	7.78657	3890
ENSMUSG00000023272	Creld2	chr15:88819646-88826681	+	non-BED genes	No	6.46708	8.1925	6.72871	8.06323	0.919	1.164	0.956	1.146	4.49509	7036
ENSMUSG00000023961	Enpp4	chr17:44096308-44105809	-	non-BED genes	No	10.0276	7.05632	9.17551	12.6634	1.055	0.743	0.966	1.333	11.3247	9502
ENSMUSG00000023846	Riok2	chr17:17374332-17394898	+	non-BED genes	No	19.6919	20.7504	15.8101	17.0568	0.957	1.009	0.769	0.829	14.4393	20567
ENSMUSG00000020089	Ppa1	chr10:61648552-61674168	+	non-BED genes	No	30.5188	32.471	19.7626	19.6929	1.191	1.268	0.771	0.769	21.9179	25617
ENSMUSG00000035104	Eva1a	chr6:82041043-82093099	+	non-BED genes	No	17.294	16.4448	29.9263	34.5788	0.332	0.316	0.575	0.664	0.0850645	52057
ENSMUSG00000028962	Slc4a2	chr5:24423837-24440950	+	non-BED genes	No	20.2005	20.8102	12.8928	11.2162	1.18	1.216	0.753	0.655	31.062	17114
ENSMUSG00000004677	Myo9b	chr8:71272714-71360712	+	non-BED genes	No	67.65	77.0215	78.6741	71.5353	0.769	0.875	0.894	0.813	11.6132	87999
ENSMUSG00000026753	Ppp6c	chr2:39194354-39226451	-	non-BED genes	No	26.159	27.8067	38.9606	38.7138	0.815	0.866	1.214	1.206	10.7216	32098
ENSMUSG00000041870	Ankrd13a	chr5:114774677-114806200	+	non-BED genes	No	30.5914	41.7399	39.6664	36.2845	0.97	1.324	1.258	1.151	4.65792	31524
ENSMUSG00000031068	Glrx3	chr7:137437648-137468594	+	non-BED genes	No	27.7576	26.3715	29.0793	24.8616	0.897	0.852	0.94	0.803	5.29802	30947
ENSMUSG00000027593	Raly	chr2:154791096-154867261	+	non-BED genes	No	53.9165	54.238	64.8873	68.0723	0.708	0.712	0.852	0.894	5.90637	76166
ENSMUSG00000022674	Ube2v2	chr16:15552677-15594524	-	non-BED genes	No	17.73	16.9232	22.68	22.8458	0.424	0.404	0.542	0.546	11.1025	41848
ENSMUSG00000028896	Rcc1	chr4:132331919-132353605	-	non-BED genes	No	22.8891	23.0825	19.7156	19.5378	1.055	1.064	0.909	0.901	35.9493	21687
ENSMUSG00000028957	Per3	chr4:151003652-151044665	-	non-BED genes	No	44.5429	44.3113	35.0081	33.235	1.086	1.08	0.854	0.81	17.4261	41014
ENSMUSG00000027642	Rpn2	chr2:157279017-157326319	+	non-BED genes	No	39.7471	47.4208	53.1239	56.6493	0.84	1.002	1.123	1.198	4.40739	47303
ENSMUSG00000024561	Mbd1	chr18:74268272-74282685	+	non-BED genes	No	14.1694	13.2156	11.4812	12.6117	0.983	0.917	0.797	0.875	10.7671	14414
ENSMUSG00000030079	Ruvbl1	chr6:88465409-88497572	+	non-BED genes	No	36.9859	44.0123	41.878	38.2486	1.15	1.368	1.302	1.189	2.21288	32164
ENSMUSG00000071644	Eef1g	chr19:8967041-8978479	+	non-BED genes	No	14.0968	14.4714	13.128	11.8364	1.232	1.265	1.148	1.035	11.0935	11439
ENSMUSG00000030264	Thumpd3	chr6:113046225-113068273	+	non-BED genes	No	20.4912	19.973	19.8568	18.1423	0.929	0.906	0.901	0.823	19.9932	22049
ENSMUSG00000029432	Gbas	chr5:129725063-129758327	+	non-BED genes	No	19.4012	23.0825	22.4918	24.7582	0.583	0.694	0.676	0.744	1.12667	33265
ENSMUSG00000024603	Dctn4	chr18:60526221-60558762	+	non-BED genes	No	31.4634	31.4544	21.0331	20.6233	0.967	0.967	0.646	0.634	11.2714	32542
ENSMUSG00000022913	Psmg1	chr16:95979933-95990960	-	non-BED genes	No	7.19371	8.1327	7.15219	6.5643	0.652	0.737	0.649	0.595	41.3741	11028
ENSMUSG00000006717	Acot13	chr13:24817948-24831517	-	non-BED genes	No	13.2248	14.3518	12.3281	13.4387	0.975	1.058	0.908	0.99	18.9786	13570
ENSMUSG00000031429	Psmd10	chrX:140948429-140956728	-	non-BED genes	No	3.99651	3.28896	2.63502	2.99787	0.482	0.396	0.317	0.361	18.169	8300
ENSMUSG00000015452	Ager	chr17:34597862-34600936	+	non-BED genes	No	2.25258	3.52816	2.25859	2.53268	0.733	1.147	0.735	0.824	9.15925	3075
ENSMUSG00000038028	9630033F20Rik	chr6:127085116-127109550	-	non-BED genes	No	26.7403	24.4579	20.4214	21.0884	1.094	1.001	0.836	0.863	2.82112	24435
ENSMUSG00000043458	Pcdhb12	chr18:37435621-37438654	+	non-BED genes	No	1.30795	0.298996	1.2234	1.03375	0.431	0.099	0.403	0.341	5.08805	3034
ENSMUSG00000071113	Mboat4	chr8:34115030-34125185	+	non-BED genes	No	13.0068	12.9764	7.52863	6.92611	1.281	1.278	0.741	0.682	0	10156
ENSMUSG00000021408	Ripk1	chr13:34002363-34035170	+	non-BED genes	No	19.9099	17.1026	19.198	21.3469	0.607	0.521	0.585	0.651	4.60294	32808
ENSMUSG00000007216	Zfp775	chr6:48613180-48623227	+	non-BED genes	No	3.63319	3.58796	3.10556	4.75524	0.362	0.357	0.309	0.473	1.51274	10048
ENSMUSG00000024999	Noc3l	chr19:38788128-38819237	-	non-BED genes	No	23.6884	22.7835	25.2209	25.4819	0.761	0.732	0.811	0.819	16.2168	31110
ENSMUSG00000019863	Qrsl1	chr10:43874188-43901745	-	non-BED genes	No	14.8234	10.8237	12.3752	13.1286	0.538	0.393	0.449	0.476	13.9828	27558
ENSMUSG00000030763	Lcmt1	chr7:123377982-123430358	+	non-BED genes	No	50.5013	51.1284	61.0289	56.4943	0.964	0.976	1.165	1.079	30.8408	52377
ENSMUSG00000028542	Slc6a9	chr4:117834506-117875198	+	non-BED genes	No	42.9443	50.351	43.8542	37.525	1.055	1.237	1.078	0.922	0	40693
ENSMUSG00000080717	B230307C23Rik	chr16:97997323-98010000	+	non-BED genes	No	5.88577	7.11612	6.91693	8.52841	0.464	0.561	0.546	0.673	33.1998	12678
ENSMUSG00000028811	Yars	chr4:129189760-129219607	+	non-BED genes	No	30.9548	32.8896	23.1035	20.6233	1.037	1.102	0.774	0.691	3.16942	29848
ENSMUSG00000002996	Hbp1	chr12:31926254-31950535	-	non-BED genes	No	22.5984	25.1157	20.3743	21.1401	0.931	1.034	0.839	0.871	0.609941	24282
ENSMUSG00000026914	Psmd14	chr2:61711694-61800376	+	non-BED genes	No	74.8437	69.128	85.6852	83.7852	0.844	0.779	0.966	0.945	29.2566	88683
ENSMUSG00000029754	Dlx6	chr6:6863334-6868568	+	non-BED genes	No	2.6159	1.31558	2.63502	2.32593	0.5	0.251	0.503	0.444	0.639244	5235
ENSMUSG00000031516	Dctn6	chr8:34090420-34108796	-	non-BED genes	No	24.5604	19.7936	20.2802	16.695	1.336	1.077	1.104	0.908	0.657581	18377
ENSMUSG00000026020	Nop58	chr1:59685006-59711510	+	non-BED genes	No	16.7127	19.5544	18.4451	19.4344	0.631	0.738	0.696	0.733	15.6729	26505
ENSMUSG00000054931	Zkscan4	chr13:21478907-21485507	+	non-BED genes	No	8.28367	7.47491	8.32854	6.97779	1.255	1.132	1.262	1.057	81.6231	6601
ENSMUSG00000029617	Ccz1	chr5:143987916-144014853	-	non-BED genes	No	20.7818	22.0659	20.5155	20.1064	0.771	0.819	0.762	0.746	2.36067	26938
ENSMUSG00000061536	Sec22c	chr9:121680047-121705490	-	non-BED genes	No	31.5361	33.5474	32.5613	30.6506	1.239	1.318	1.28	1.205	1.41168	25444
ENSMUSG00000005374	Tbl2	chr5:135149657-135163873	+	non-BED genes	No	17.8753	18.9564	13.4574	14.5758	1.257	1.333	0.947	1.025	37.513	14217
ENSMUSG00000027253	Lrp4	chr2:91457511-91513779	+	non-BED genes	No	35.3146	40.6635	39.0547	42.3836	0.628	0.723	0.694	0.753	3.66676	56269
ENSMUSG00000040033	Stat2	chr10:128270576-128292849	+	non-BED genes	No	11.6989	11.9001	8.9873	9.4071	0.525	0.534	0.403	0.422	10.0855	22274
ENSMUSG00000064210	Ano6	chr15:95790843-95975464	+	non-BED genes	No	207.382	210.972	217.06	225.719	1.123	1.143	1.176	1.223	28.5778	184622
ENSMUSG00000031007	Atp6ap2	chrX:12587801-12617049	+	non-BED genes	No	20.5638	23.0825	20.1391	18.6591	0.703	0.789	0.689	0.638	13.9809	29249
ENSMUSG00000046707	Csnk2a2	chr8:95446096-95488820	-	non-BED genes	No	44.6156	52.0254	53.9238	51.6874	1.044	1.218	1.262	1.21	0.141012	42725
ENSMUSG00000031568	Rwdd4a	chr8:47533664-47552955	+	non-BED genes	No	14.0968	16.6242	17.1276	12.9218	0.731	0.862	0.888	0.67	5.51436	19292
ENSMUSG00000042734	Ttc9	chr12:81631369-81664941	+	non-BED genes	No	32.844	36.7168	44.4189	37.9902	0.978	1.094	1.323	1.132	2.1985	33573
ENSMUSG00000036112	Metap2	chr10:93858489-93897093	-	non-BED genes	No	31.4634	29.4811	32.7966	30.8057	0.815	0.764	0.85	0.798	0.0550542	38605
ENSMUSG00000031072	Oraov1	chr7:144915100-144930748	+	non-BED genes	No	16.858	18.3584	14.5867	14.3174	1.077	1.173	0.932	0.915	9.83252	15649
ENSMUSG00000021120	Pigh	chr12:79080673-79089670	-	non-BED genes	No	9.59162	8.4317	8.14033	8.21829	1.066	0.937	0.905	0.913	15.919	8998
ENSMUSG00000061898	Rbak	chr5:143172186-143180775	-	non-BED genes	No	8.64699	8.5513	8.04622	6.35755	1.007	0.995	0.937	0.74	4.14234	8590
ENSMUSG00000037259	Dzank1	chr2:144470557-144527414	-	non-BED genes	No	70.4112	74.1511	55.2413	55.9774	1.238	1.304	0.972	0.985	7.72966	56858
ENSMUSG00000021235	Coq6	chr12:84361657-84373796	+	non-BED genes	No	14.4601	11.7805	8.56381	10.3375	1.191	0.97	0.705	0.852	0.0775673	12140
ENSMUSG00000025602	Zfp202	chr9:40192316-40213604	+	non-BED genes	No	9.44629	10.5845	15.4337	15.868	0.444	0.497	0.725	0.745	3.1707	21289
ENSMUSG00000036202	Rif1	chr2:52072837-52122383	+	non-BED genes	No	17.076	16.9232	24.5151	25.1717	0.345	0.342	0.495	0.508	5.60184	49547
ENSMUSG00000028189	Ctbs	chr3:146450470-146465849	+	non-BED genes	No	13.0068	11.6609	8.89319	9.09698	0.846	0.758	0.578	0.591	72.6707	15380
ENSMUSG00000022911	Arl13b	chr16:62793685-62847040	-	non-BED genes	No	57.3317	65.8988	67.8988	67.4003	1.075	1.235	1.273	1.263	32.353	53356
ENSMUSG00000010755	Cars	chr7:143557230-143600090	-	non-BED genes	No	28.6295	32.1122	34.3023	35.044	0.668	0.749	0.8	0.818	44.5566	42861
ENSMUSG00000097145	9230114K14Rik	chr5:52190681-52197984	+	non-BED genes	No	4.06917	3.94675	5.83469	6.04742	0.557	0.54	0.799	0.828	104.606	7304
ENSMUSG00000025103	Btbd1	chr7:81792075-81829431	-	non-BED genes	No	31.8267	35.76	44.4189	40.4195	0.852	0.957	1.189	1.082	1.87802	37357
ENSMUSG00000047583	Tyw3	chr3:154576520-154597104	-	non-BED genes	No	20.8545	16.983	12.8928	11.8881	1.013	0.825	0.626	0.578	8.06263	20585
ENSMUSG00000038909	Kat7	chr11:95274259-95310246	-	non-BED genes	No	39.8924	37.554	31.2909	28.9966	1.108	1.044	0.869	0.806	3.35879	35988
ENSMUSG00000047036	Zfp445	chr9:122851914-122862128	-	non-BED genes	No	3.92384	4.84374	5.31709	6.61598	0.384	0.474	0.521	0.648	0.998841	10215
ENSMUSG00000026578	Ccdc181	chr1:164275585-164287847	+	non-BED genes	No	13.7335	13.1558	10.1636	9.56216	1.12	1.073	0.829	0.78	40.3332	12263
ENSMUSG00000042590	Ipo11	chr13:106794439-106936915	-	non-BED genes	No	118.878	127.97	125.116	132.113	0.834	0.898	0.878	0.927	27.7626	142477
ENSMUSG00000092544	Gm20422	chr8:69742862-69774886	-	non-BED genes	No	40.619	34.1454	31.6673	32.8732	1.268	1.066	0.989	1.026	15.6878	32025
ENSMUSG00000014633	Cmc2	chr8:116888685-116921455	-	non-BED genes	No	16.1314	14.7106	19.6215	21.7087	0.492	0.449	0.599	0.662	184.195	32771
ENSMUSG00000040464	Gtpbp10	chr5:5537454-5559538	-	non-BED genes	No	12.4982	11.9599	11.4341	13.1286	0.566	0.542	0.518	0.594	21.7071	22085
ENSMUSG00000035293	G2e3	chr12:51348061-51376986	+	non-BED genes	No	29.8648	36.7766	26.5855	28.0146	1.032	1.271	0.919	0.968	12.6523	28926
ENSMUSG00000028348	Murc	chr4:48663514-48673502	+	non-BED genes	No	8.13834	10.0463	11.387	10.3892	0.815	1.006	1.14	1.04	1.99689	9989
ENSMUSG00000031502	Col4a1	chr8:11198423-11312826	-	non-BED genes	No	122.511	146.508	135.515	135.524	1.071	1.281	1.185	1.185	10.6728	114404
ENSMUSG00000055313	Pgbd1	chr13:21421275-21441058	-	non-BED genes	No	15.768	16.684	15.1043	13.9556	0.797	0.843	0.763	0.705	55.7615	19784
ENSMUSG00000031878	Nae1	chr8:104511028-104534637	-	non-BED genes	No	21.4358	25.4147	21.9271	19.8996	0.908	1.076	0.929	0.843	14.7508	23610
ENSMUSG00000012117	Dhdds	chr4:133969028-134000918	-	non-BED genes	No	24.9963	25.9529	18.4922	20.4165	0.784	0.814	0.58	0.64	9.10174	31891
ENSMUSG00000062014	Gmfb	chr14:46808149-46822242	-	non-BED genes	No	14.3148	10.4649	13.081	13.4387	1.016	0.743	0.928	0.954	11.7244	14094
ENSMUSG00000019726	Lyst	chr13:13590409-13777440	+	non-BED genes	No	113.719	107.639	113.212	120.121	0.608	0.576	0.605	0.642	5.98745	187032
ENSMUSG00000022100	Xpo7	chr14:70654246-70766628	-	non-BED genes	No	82.4734	83.3602	91.8492	95.6733	0.734	0.742	0.817	0.851	2.96966	112383
ENSMUSG00000058440	Nrf1	chr6:30047988-30153458	+	non-BED genes	No	47.4494	53.7596	70.5338	72.0522	0.45	0.51	0.669	0.683	2.0708	105471
ENSMUSG00000033703	Fuk	chr8:110882463-110902459	-	non-BED genes	No	16.1314	19.0162	15.7631	14.2657	0.807	0.951	0.788	0.713	35.2311	19997
ENSMUSG00000037896	Rcor1	chr12:111039351-111115901	+	non-BED genes	No	80.2208	84.018	95.6136	93.3991	1.048	1.098	1.249	1.22	6.5822	76551
ENSMUSG00000029089	Pacrgl	chr5:48372392-48388756	+	non-BED genes	No	11.0449	10.4051	11.8576	11.578	0.675	0.636	0.725	0.707	9.44093	16365
ENSMUSG00000020700	Map3k3	chr11:106084613-106155446	+	non-BED genes	No	80.0755	93.0477	86.2498	87.9719	1.13	1.314	1.218	1.242	47.2818	70834
ENSMUSG00000034825	Nrip3	chr7:109758055-109782025	-	non-BED genes	No	22.3804	24.9363	21.5977	20.4682	0.934	1.04	0.901	0.854	0.462951	23971
ENSMUSG00000014763	Fam120b	chr17:15396246-15433580	+	non-BED genes	No	32.19	31.9328	39.5253	38.5071	0.862	0.855	1.059	1.031	17.265	37335
ENSMUSG00000032042	Srpr	chr9:35200175-35247973	+	non-BED genes	No	33.5707	36.7766	38.2078	35.9227	0.702	0.769	0.799	0.752	0.412409	47799
ENSMUSG00000035151	Elmod2	chr8:83312632-83332486	-	non-BED genes	No	12.4255	10.4051	10.9165	12.7151	0.626	0.524	0.55	0.64	9.20434	19855
ENSMUSG00000076432	Ywhaq	chr12:21390071-21417637	-	non-BED genes	No	24.4877	28.2253	36.1374	34.3204	0.888	1.024	1.311	1.245	13.4414	27567
ENSMUSG00000028347	Tmeff1	chr4:48585174-48663131	+	non-BED genes	No	82.1827	88.0246	96.4135	97.2239	1.054	1.129	1.237	1.247	0.637	77958
ENSMUSG00000022814	Umps	chr16:33954782-33967038	-	non-BED genes	No	11.7715	11.9599	10.3989	10.1824	0.96	0.976	0.848	0.831	35.4594	12257
ENSMUSG00000044176	Spink10	chr18:62548911-62661366	+	non-BED genes	No	41.491	34.3846	53.9238	57.7348	0.369	0.306	0.48	0.513	46.1675	112456
ENSMUSG00000004929	Thop1	chr10:81070035-81082559	+	non-BED genes	No	14.0968	15.3086	12.3281	10.3892	1.125	1.222	0.984	0.829	16.6473	12525
ENSMUSG00000097464	Gm26736	chr6:4946568-4947803	+	non-BED genes	No	0.290655	0.83719	0.752863	0.465186	0.235	0.677	0.609	0.376	1.46917	1236
ENSMUSG00000028441	1110017D15Rik	chr4:41505009-41517333	-	non-BED genes	No	14.0968	17.2222	15.2455	15.2995	1.144	1.397	1.237	1.241	1.97734	12325
ENSMUSG00000024642	Tle4	chr19:14448072-14598051	-	non-BED genes	No	131.376	113.678	145.255	154.08	0.876	0.758	0.968	1.027	16.4775	149980
ENSMUSG00000054717	Hmgb2	chr8:57511843-57515999	+	non-BED genes	No	1.74393	1.67438	1.50573	1.60231	0.42	0.403	0.362	0.385	25.0029	4157
ENSMUSG00000024528	Srfbp1	chr18:52465693-52490738	+	non-BED genes	No	13.2248	12.6774	22.2094	21.8121	0.528	0.506	0.887	0.871	19.5203	25046
ENSMUSG00000020739	Nup85	chr11:115564434-115583985	+	non-BED genes	No	20.0552	18.2388	17.6923	17.3153	1.026	0.933	0.905	0.886	37.9765	19552
ENSMUSG00000036246	Gmip	chr8:69808679-69821870	+	non-BED genes	No	7.92035	9.20909	8.32854	8.78685	0.6	0.698	0.631	0.666	7.68225	13192
ENSMUSG00000090673	Gm340	chr19:41582370-41586536	+	non-BED genes	No	2.76122	4.90354	3.43494	3.46305	0.663	1.177	0.824	0.831	1.84195	4167
ENSMUSG00000034429	Zfp707	chr15:75969123-75975868	+	non-BED genes	No	5.88577	6.21913	7.01103	5.68561	0.872	0.922	1.039	0.843	5.13053	6746
ENSMUSG00000022987	Zfp641	chr15:98285588-98296130	-	non-BED genes	No	9.2283	9.26889	10.8224	8.73516	0.875	0.879	1.027	0.829	3.54431	10543
ENSMUSG00000021094	Dhrs7	chr12:72650356-72664828	-	non-BED genes	No	16.204	20.571	13.2221	14.2657	1.12	1.421	0.914	0.986	22.7404	14473
ENSMUSG00000032290	Ptpn9	chr9:56994968-57062805	+	non-BED genes	No	65.1067	69.3074	45.7364	52.0492	0.96	1.022	0.674	0.767	6.33209	67838
ENSMUSG00000014074	Rnf168	chr16:32277459-32301434	+	non-BED genes	No	21.0725	20.5112	20.986	19.2794	0.879	0.855	0.875	0.804	11.9883	23976
ENSMUSG00000016018	Skiv2l2	chr13:112867780-112927380	-	non-BED genes	No	36.1139	40.4243	34.6787	39.9026	0.606	0.678	0.582	0.669	10.3146	59601
ENSMUSG00000073719	Vps13d	chr4:144972623-144974683	-	non-BED genes	No	1.45328	2.39197	1.74099	2.89449	0.705	1.161	0.845	1.404	1.38047	2061
ENSMUSG00000028898	Trnau1ap	chr4:132311763-132329538	-	non-BED genes	No	16.5673	18.8966	12.2811	12.8185	0.932	1.063	0.691	0.721	7.13412	17776
ENSMUSG00000021339	Mrs2	chr13:24992483-25020379	-	non-BED genes	No	18.0933	20.4514	28.844	24.8099	0.649	0.733	1.034	0.889	10.9402	27897
ENSMUSG00000028132	Tmem56	chr3:121201761-121283098	-	non-BED genes	No	68.5946	70.0848	73.9688	73.4994	0.843	0.862	0.909	0.904	0	81338
ENSMUSG00000022558	Mroh1	chr15:76380261-76453038	+	non-BED genes	No	54.9338	72.1777	62.6758	63.0069	0.755	0.992	0.861	0.866	17.9195	72778
ENSMUSG00000001089	Luzp1	chr4:136469761-136554780	+	non-BED genes	No	76.9509	82.822	97.0722	93.0373	0.905	0.974	1.142	1.094	16.4226	85020
ENSMUSG00000044595	Dnd1	chr18:36763671-36766214	-	non-BED genes	No	1.45328	1.31558	1.27046	1.34387	0.571	0.517	0.499	0.528	3.5328	2544
ENSMUSG00000040661	Rad54l2	chr9:106688082-106789213	-	non-BED genes	No	69.0306	72.8355	85.2146	80.7873	0.683	0.72	0.843	0.799	2.41709	101132
ENSMUSG00000029165	Agbl5	chr5:30888694-30906965	+	non-BED genes	No	22.0171	21.7071	19.8568	19.6929	1.205	1.188	1.087	1.078	15.7861	18272
ENSMUSG00000031314	Taf1	chrX:101532734-101601789	+	non-BED genes	No	29.3562	31.873	23.1035	24.3447	0.425	0.462	0.335	0.353	9.33212	69056
ENSMUSG00000029587	Zfp12	chr5:143235163-143248834	+	non-BED genes	No	12.8615	12.0197	13.6456	12.9735	0.941	0.879	0.998	0.949	3.87952	13672
ENSMUSG00000044712	Slc38a6	chr12:73286779-73354049	+	non-BED genes	No	34.588	36.657	43.2896	45.0714	0.514	0.545	0.644	0.67	12.1298	67271
ENSMUSG00000039703	Nploc4	chr11:120380370-120437708	-	non-BED genes	No	55.0791	61.2345	69.1693	65.5913	0.961	1.068	1.206	1.144	11.6785	57339
ENSMUSG00000022280	Rnf19a	chr15:36239934-36283147	-	non-BED genes	No	45.1969	43.7731	50.9594	50.3435	1.046	1.013	1.179	1.165	11.559	43214
ENSMUSG00000017561	Crlf3	chr11:80046493-80080991	-	non-BED genes	No	13.5155	16.5046	18.351	22.3806	0.392	0.478	0.532	0.649	3.31229	34499
ENSMUSG00000027170	Eif3m	chr2:104999656-105017080	-	non-BED genes	No	11.1176	13.096	12.7516	12.6634	0.638	0.752	0.732	0.727	7.34617	17425
ENSMUSG00000063239	Grm4	chr17:27422387-27513341	-	non-BED genes	No	48.1034	56.6897	70.675	72.414	0.529	0.623	0.777	0.796	1.60532	90955
ENSMUSG00000057895	Zfp105	chr9:122923072-122931028	+	non-BED genes	No	4.14183	4.30555	3.99958	5.16874	0.521	0.541	0.503	0.65	10.133	7957
ENSMUSG00000007570	Fance	chr17:28313530-28326568	+	non-BED genes	No	14.6781	17.9996	14.3985	12.7151	1.126	1.38	1.104	0.975	9.87225	13039
ENSMUSG00000034333	Zbed4	chr15:88751660-88784516	+	non-BED genes	No	15.6954	18.3584	23.6211	23.4144	0.478	0.559	0.719	0.713	1.41634	32857
ENSMUSG00000062822	4833420G17Rik	chr13:119462759-119486117	+	non-BED genes	No	14.8234	18.777	15.669	18.6591	0.635	0.804	0.671	0.799	17.7509	23359
ENSMUSG00000098340	RP23-292F17.5	chr9:72268614-72274856	-	non-BED genes	No	5.44978	5.38194	3.43494	3.46305	0.873	0.862	0.55	0.555	7.83457	6243
ENSMUSG00000035078	Mtmr9	chr14:63523616-63543953	-	non-BED genes	No	14.0241	15.2488	18.0687	19.2277	0.69	0.75	0.888	0.945	3.66051	20338
ENSMUSG00000036977	Anapc10	chr8:79711820-79777321	+	non-BED genes	No	28.3389	30.1388	28.0441	33.1833	0.433	0.46	0.428	0.507	50.2207	65502
ENSMUSG00000024981	Acsl5	chr19:55253369-55296627	+	non-BED genes	No	57.6224	52.9822	36.0904	35.1474	1.332	1.225	0.834	0.812	3.27938	43259
ENSMUSG00000041341	Atg2b	chr12:105613539-105685241	-	non-BED genes	No	47.4494	53.5204	62.1582	63.0586	0.662	0.746	0.867	0.879	20.3356	71703
ENSMUSG00000030224	Strap	chr6:137735078-137751932	+	non-BED genes	No	12.9342	14.7704	16.0454	15.1444	0.767	0.876	0.952	0.899	1.69823	16855
ENSMUSG00000000440	Pparg	chr6:115361221-115490401	+	non-BED genes	No	139.587	133.053	129.634	125.755	1.081	1.03	1.004	0.973	9.38303	129181
ENSMUSG00000047714	Ppp1r2	chr16:31251537-31275277	-	non-BED genes	No	20.3459	22.7237	25.4091	26.3089	0.857	0.957	1.07	1.108	24.5119	23741
ENSMUSG00000029253	Cenpc1	chr5:86012043-86065583	-	non-BED genes	No	22.4531	18.5378	22.3977	23.5694	0.419	0.346	0.418	0.44	31.9794	53541
ENSMUSG00000027195	Hsd17b12	chr2:94032689-94157964	-	non-BED genes	No	85.7432	84.3768	106.295	114.539	0.684	0.674	0.848	0.914	5.37798	125276
ENSMUSG00000053119	Chmp3	chr6:71543797-71582609	+	non-BED genes	No	39.7471	41.7997	37.6902	36.5947	1.024	1.077	0.971	0.943	14.3488	38813
ENSMUSG00000047804	Akap10	chr11:61871307-61930252	-	non-BED genes	No	44.4702	48.9756	54.3002	53.6515	0.754	0.831	0.921	0.91	22.2877	58946
ENSMUSG00000025982	Sf3b1	chr1:54985169-55027478	-	non-BED genes	No	36.4772	40.1851	32.3731	30.8574	0.862	0.95	0.765	0.729	17.0882	42310
ENSMUSG00000001642	Akr1b3	chr6:34303934-34317497	-	non-BED genes	No	11.6262	13.2156	12.187	14.059	0.857	0.974	0.898	1.036	5.36654	13564
ENSMUSG00000032342	Mto1	chr9:78448208-78475348	+	non-BED genes	No	23.3251	21.6473	16.5159	16.54	0.859	0.798	0.609	0.609	4.78325	27141
ENSMUSG00000028020	Glrb	chr3:80843599-80913660	-	non-BED genes	No	71.8645	70.922	78.533	74.7916	1.026	1.012	1.121	1.068	3.21381	70062
ENSMUSG00000040188	Scamp2	chr9:57560944-57588797	+	non-BED genes	No	34.0793	33.368	35.5728	34.217	1.223	1.198	1.277	1.228	23.2596	27854
ENSMUSG00000021595	Nsun2	chr13:69533746-69635780	+	non-BED genes	No	78.6949	98.3698	86.3439	81.6143	0.771	0.964	0.846	0.8	2.844	102035
ENSMUSG00000033589	Reep4	chr14:70545251-70548933	+	non-BED genes	No	3.19721	3.40856	3.62315	4.23836	0.868	0.925	0.984	1.151	8.02954	3683
ENSMUSG00000068457	Uty	chrY:1096861-1245759	-	non-BED genes	No	33.28	31.2152	35.5257	38.6105	0.224	0.21	0.239	0.259	8.21079	148899
ENSMUSG00000042426	Dhx29	chr13:112927730-112969431	+	non-BED genes	No	26.2316	23.6805	25.9267	29.4101	0.629	0.568	0.622	0.705	77.0987	41702
ENSMUSG00000038095	Sbno1	chr5:124368702-124425914	-	non-BED genes	No	60.3109	63.5068	51.4299	51.739	1.054	1.11	0.899	0.904	0.413465	57213
ENSMUSG00000005057	Sh2b2	chr5:136218149-136244903	-	non-BED genes	No	15.1867	18.3584	22.0212	20.6749	0.568	0.686	0.823	0.773	3.78533	26755
ENSMUSG00000027206	Cops2	chr2:125830304-125859139	-	non-BED genes	No	23.1071	25.6539	22.68	22.3289	0.801	0.89	0.787	0.774	10.1072	28836
ENSMUSG00000020640	Itsn2	chr12:4593008-4713950	+	non-BED genes	No	88.3591	95.2005	102.248	108.957	0.731	0.787	0.845	0.901	2.90183	120943
ENSMUSG00000035852	Misp	chr10:79821021-79830452	+	non-BED genes	No	6.53974	6.75732	7.10514	5.7373	0.693	0.716	0.753	0.608	1.52551	9432
ENSMUSG00000023235	Ccl25	chr8:4325210-4360020	+	non-BED genes	No	21.7991	17.581	21.6448	20.1581	0.626	0.505	0.622	0.579	25.5674	34811
ENSMUSG00000097583	6430590A07Rik	chr3:40885897-40894123	-	non-BED genes	No	6.10376	5.74073	3.95253	5.37549	0.742	0.698	0.48	0.653	10.307	8227
ENSMUSG00000000355	Mcts1	chrX:38600578-38613426	+	non-BED genes	No	9.15563	7.41511	5.55236	5.42717	0.713	0.577	0.432	0.422	12.3984	12849
ENSMUSG00000040669	Phc1	chr6:122317731-122340561	-	non-BED genes	No	24.3424	22.0061	15.716	16.7984	1.066	0.964	0.688	0.736	1.32979	22831
ENSMUSG00000031701	Dnaja2	chr8:85537640-85555271	-	non-BED genes	No	19.2559	21.4679	23.527	20.8817	1.092	1.218	1.334	1.184	2.84412	17632
ENSMUSG00000025949	Pikfyve	chr1:65186750-65274012	+	non-BED genes	No	46.2142	46.5836	50.4418	57.2179	0.53	0.534	0.578	0.656	12.3817	87263
ENSMUSG00000010392	Gosr1	chr11:76726602-76763579	-	non-BED genes	No	28.6295	31.3946	24.5151	27.7561	0.774	0.849	0.663	0.751	27.2508	36978
ENSMUSG00000022130	Tgds	chr14:118111911-118132765	-	non-BED genes	No	12.4982	12.7372	14.7749	14.1106	0.599	0.611	0.708	0.677	13.1905	20855
ENSMUSG00000034560	A230046K03Rik	chr10:83543941-83596469	+	non-BED genes	No	40.1104	37.6138	47.8068	46.5186	0.764	0.716	0.91	0.886	64.5841	52529
ENSMUSG00000030157	Clec2d	chr6:129180615-129186534	+	non-BED genes	No	5.37712	4.00655	6.58755	5.22042	0.908	0.677	1.113	0.882	3.94101	5920
ENSMUSG00000034591	Slc41a2	chr10:83230848-83337882	-	non-BED genes	No	72.3731	79.1743	97.8721	97.1722	0.676	0.74	0.914	0.908	3.67211	107035
ENSMUSG00000033009	Ogfod1	chr8:94037198-94067921	+	non-BED genes	No	34.4426	34.7434	35.1022	34.5788	1.121	1.131	1.143	1.125	19.0419	30724
ENSMUSG00000029098	Acox3	chr5:35583040-35613801	+	non-BED genes	No	14.9687	17.1026	20.2802	18.4524	0.487	0.556	0.659	0.6	13.0503	30762
ENSMUSG00000021891	Mettl6	chr14:31478320-31495030	-	non-BED genes	No	15.6954	16.1458	21.4095	18.9693	0.939	0.966	1.281	1.135	10.1269	16711
ENSMUSG00000030104	Edem1	chr6:108828641-108859356	+	non-BED genes	No	28.5569	33.5474	35.2434	36.0261	0.93	1.092	1.147	1.173	17.1718	30716
ENSMUSG00000022722	Arl6	chr16:59612949-59639391	-	non-BED genes	No	22.0898	18.4182	17.1276	18.7108	0.835	0.697	0.648	0.708	23.4509	26443
ENSMUSG00000048163	Selplg	chr5:113817798-113830501	-	non-BED genes	No	4.57782	4.60455	4.61128	4.80692	0.36	0.362	0.363	0.378	6.56124	12704
ENSMUSG00000029070	Mxra8	chr4:155839680-155844088	+	non-BED genes	No	1.52594	3.04976	3.81137	2.79112	0.346	0.692	0.864	0.633	5.43611	4409
ENSMUSG00000034194	R3hcc1	chr14:69697307-69707584	-	non-BED genes	No	7.26638	8.1327	7.15219	7.33961	0.707	0.791	0.696	0.714	31.7229	10278
ENSMUSG00000036560	Lgi4	chr7:31059342-31070935	+	non-BED genes	No	11.2629	15.6674	13.1751	10.079	0.971	1.351	1.136	0.869	2.49551	11594
ENSMUSG00000050619	Zscan29	chr2:121158273-121171125	-	non-BED genes	No	8.57432	11.9599	13.6456	14.0073	0.667	0.931	1.062	1.09	29.4251	12853
ENSMUSG00000032575	Manf	chr9:106838312-106891979	-	non-BED genes	No	58.567	68.1712	52.7945	54.3234	1.091	1.27	0.984	1.012	66.4449	53668
ENSMUSG00000073678	Pgap1	chr1:54473000-54557684	-	non-BED genes	No	42.0723	36.4776	43.0543	44.2961	0.497	0.431	0.508	0.523	35.7521	84685
ENSMUSG00000028414	Fktn	chr4:53713998-53765785	+	non-BED genes	No	57.695	50.052	62.3464	57.6314	1.114	0.966	1.204	1.113	18.0359	51788
ENSMUSG00000030967	Zranb1	chr7:132931142-132986391	+	non-BED genes	No	38.2211	36.5374	66.7225	61.3529	0.692	0.661	1.208	1.11	5.949	55250
ENSMUSG00000016763	Scube1	chr15:83602583-83725021	-	non-BED genes	No	90.0304	115.114	123.422	115.108	0.735	0.94	1.008	0.94	2.96513	122439
ENSMUSG00000029833	Trim24	chr6:37870811-37966296	+	non-BED genes	No	39.6744	40.6037	52.371	56.6493	0.415	0.425	0.548	0.593	19.8148	95486
ENSMUSG00000030823	9130019O22Rik	chr7:127382260-127387166	-	non-BED genes	No	2.03459	2.21257	1.74099	2.22256	0.415	0.451	0.355	0.453	14.2123	4907
ENSMUSG00000045594	Glb1	chr9:114401076-114474376	+	non-BED genes	No	36.1866	36.5374	38.2548	37.0082	0.494	0.498	0.522	0.505	3.58391	73301
ENSMUSG00000031150	Ccdc120	chrX:7731714-7750905	-	non-BED genes	No	11.8442	13.1558	11.6223	11.3195	0.617	0.685	0.606	0.59	15.0647	19192
ENSMUSG00000022313	Utp23	chr15:51877429-51884614	+	non-BED genes	No	3.19721	4.30555	5.03477	3.77318	0.445	0.599	0.701	0.525	2.60827	7186
ENSMUSG00000051166	Eml5	chr12:98786604-98901484	-	non-BED genes	No	95.3349	93.1075	96.837	102.651	0.83	0.81	0.843	0.894	3.63112	114881
ENSMUSG00000031347	Cetn2	chrX:72913532-72918411	-	non-BED genes	No	4.35983	3.58796	2.54091	1.91243	0.893	0.735	0.521	0.392	7.90551	4880
ENSMUSG00000024782	Ak3	chr19:29020833-29047961	-	non-BED genes	No	30.1555	33.9062	33.5024	30.2888	1.112	1.25	1.235	1.116	2.25823	27129
ENSMUSG00000031210	Gpr165	chrX:96713441-96719388	+	non-BED genes	No	3.85118	3.28896	5.4112	5.01367	0.647	0.553	0.91	0.843	77.8834	5948
ENSMUSG00000025178	Pi4k2a	chr19:42090435-42122218	+	non-BED genes	No	19.3286	24.9961	21.3625	22.5357	0.608	0.786	0.672	0.709	7.7023	31784
ENSMUSG00000038534	Osbpl7	chr11:97050628-97068904	+	non-BED genes	No	11.6989	13.993	14.1632	13.1803	0.64	0.766	0.775	0.721	24.3034	18277
ENSMUSG00000037017	Zscan21	chr5:138116903-138134265	+	non-BED genes	No	16.858	14.3518	9.78721	9.71722	0.971	0.827	0.564	0.56	32.8362	17363
ENSMUSG00000019232	Etnppl	chr3:130617448-130635750	+	non-BED genes	No	13.6608	10.4649	13.8339	14.7309	0.746	0.572	0.756	0.805	0.769468	18303
ENSMUSG00000020246	Hcfc2	chr10:82696160-82742428	+	non-BED genes	No	54.7158	52.6832	55.1001	50.757	1.183	1.139	1.191	1.097	0	46269
ENSMUSG00000028224	Nbn	chr4:15957925-15992589	+	non-BED genes	No	36.2592	39.5871	31.9967	33.235	1.046	1.142	0.923	0.959	13.0251	34665
ENSMUSG00000011179	Odc1	chr12:17544873-17551502	+	non-BED genes	No	5.95843	7.05632	8.04622	8.47673	0.899	1.064	1.214	1.279	13.3955	6630
ENSMUSG00000019772	Vip	chr10:5639218-5647614	+	non-BED genes	No	2.83389	1.73418	2.21153	3.87655	0.337	0.207	0.263	0.462	1.48321	8397
ENSMUSG00000032047	Acat1	chr9:53580522-53610382	-	non-BED genes	No	31.7541	38.3911	31.8555	29.7202	1.063	1.286	1.067	0.995	8.92165	29861
ENSMUSG00000067194	Eif1ax	chrX:159372178-159389928	+	non-BED genes	No	8.35633	7.59451	10.7283	9.51047	0.471	0.428	0.604	0.536	7.92635	17751
ENSMUSG00000061702	Tmem91	chr7:25669139-25675166	-	non-BED genes	No	5.37712	5.92013	6.54049	5.84067	0.892	0.982	1.085	0.969	7.34779	6028
ENSMUSG00000051730	Mettl5	chr2:69871198-69885615	-	non-BED genes	No	13.8788	13.5146	11.0577	12.2499	0.963	0.937	0.767	0.85	15.5264	14418
ENSMUSG00000019792	Trmt11	chr10:30534225-30600749	-	non-BED genes	No	39.0204	43.1153	46.3952	51.1705	0.587	0.648	0.697	0.769	18.2812	66525
ENSMUSG00000041028	Ghitm	chr14:37120444-37135322	-	non-BED genes	No	16.1314	16.7438	13.8809	15.5062	1.084	1.125	0.933	1.042	10.7598	14879
ENSMUSG00000002985	Apoe	chr7:19696109-19699166	-	non-BED genes	No	2.68856	2.98996	3.24672	4.03161	0.879	0.978	1.062	1.318	17.8358	3058
ENSMUSG00000043323	Fbrsl1	chr5:110361754-110448503	-	non-BED genes	No	72.0098	98.011	108.318	98.4644	0.83	1.13	1.249	1.135	3.42432	86750
ENSMUSG00000047515	BC049715	chr6:136828843-136840536	+	non-BED genes	No	9.37363	6.45832	9.64605	9.87229	0.802	0.552	0.825	0.844	59.5255	11694
ENSMUSG00000032519	Slc25a38	chr9:120110374-120124504	+	non-BED genes	No	14.5328	14.89	9.74016	10.6993	1.028	1.054	0.689	0.757	4.85257	14131
ENSMUSG00000006390	Elovl1	chr4:118428093-118432953	+	non-BED genes	No	5.44978	6.27893	5.22298	4.03161	1.121	1.292	1.074	0.829	7.66059	4861
ENSMUSG00000027312	Atrn	chr2:130906495-131030333	+	non-BED genes	No	124.11	129.645	138.433	132.216	1.002	1.047	1.118	1.068	6.32214	123839
ENSMUSG00000090812	Samd15	chr12:87199723-87213541	+	non-BED genes	No	12.0622	8.0729	5.31709	4.60018	0.873	0.584	0.385	0.333	1.47974	13819
ENSMUSG00000042699	Dhx9	chr1:153455758-153487660	-	non-BED genes	No	23.8337	22.9629	25.8797	27.2909	0.747	0.72	0.811	0.855	30.4718	31903
ENSMUSG00000026209	Dnpep	chr1:75307896-75317637	-	non-BED genes	No	11.1902	11.3619	7.2463	5.89236	1.149	1.166	0.744	0.605	2.97309	9742
ENSMUSG00000019818	Cd164	chr10:41519500-41531042	+	non-BED genes	No	7.84769	9.02969	12.7987	14.6792	0.68	0.782	1.109	1.272	84.9197	11543
ENSMUSG00000036644	Tbc1d9b	chr11:50131396-50172785	+	non-BED genes	No	39.2384	57.5867	46.8657	42.9005	0.948	1.391	1.132	1.036	7.64483	41390
ENSMUSG00000050954	Zfp169	chr13:48487647-48513451	-	non-BED genes	No	31.5361	32.7102	28.4206	25.5852	1.222	1.268	1.101	0.991	9.12117	25805
ENSMUSG00000067150	Xpo5	chr17:46202855-46242299	+	non-BED genes	No	29.2835	32.471	18.351	21.7604	0.742	0.823	0.465	0.552	2.71166	39445
ENSMUSG00000024238	Zeb1	chr18:5591860-5775467	+	non-BED genes	No	90.6844	85.2738	110.341	121.62	0.494	0.464	0.601	0.662	3.12739	183608
ENSMUSG00000075528	Aarsd1	chr11:101406839-101417615	-	non-BED genes	No	13.4428	11.1825	7.2463	6.92611	1.247	1.038	0.672	0.643	3.34672	10777
ENSMUSG00000068798	Rap1a	chr3:105727267-105801330	-	non-BED genes	No	43.3076	50.351	61.7347	64.971	0.585	0.68	0.834	0.877	7.06045	74064
ENSMUSG00000036391	Sec24a	chr11:51692264-51763634	-	non-BED genes	No	55.4425	57.7063	46.3011	48.9479	0.777	0.809	0.649	0.686	1.04803	71371
ENSMUSG00000034160	Ogt	chrX:101640060-101684351	+	non-BED genes	No	35.0966	32.2916	26.6325	23.2076	0.792	0.729	0.601	0.524	7.66259	44292
ENSMUSG00000028300	3110043O21Rik	chr4:35191285-35226175	-	non-BED genes	No	29.0655	28.5841	30.8674	31.7877	0.833	0.819	0.885	0.911	1.1049	34891
ENSMUSG00000092252	Gm20499	chr5:114809036-114823460	-	non-BED genes	No	18.3839	17.5212	14.4456	11.8364	1.274	1.215	1.001	0.821	6.05088	14425
ENSMUSG00000070287	Slc35g2	chr9:100552193-100571085	-	non-BED genes	No	18.3839	19.0162	21.833	22.8975	0.973	1.007	1.156	1.212	0.872571	18893
ENSMUSG00000030310	Slc6a1	chr6:114282635-114317522	+	non-BED genes	No	21.0725	20.0328	32.5613	33.8035	0.604	0.574	0.933	0.969	0.227009	34888
ENSMUSG00000053931	Cnn3	chr3:121426541-121458205	+	non-BED genes	No	13.9514	15.3684	17.5511	20.2614	0.441	0.485	0.554	0.64	13.3657	31665
ENSMUSG00000090278	D130062J21Rik	chr4:32243733-32246475	+	non-BED genes	No	2.17991	1.79398	1.59983	2.27424	0.795	0.654	0.583	0.829	0.545783	2743
ENSMUSG00000036097	Fam178a	chr19:44931119-44983787	+	non-BED genes	No	42.4356	44.3113	45.0777	45.5883	0.806	0.841	0.856	0.866	0.434231	52669
ENSMUSG00000066705	Fxyd6	chr9:45370185-45396158	+	non-BED genes	No	30.3735	35.8198	33.8788	28.5314	1.169	1.379	1.304	1.098	1.77847	25974
ENSMUSG00000053644	Aldh7a1	chr18:56509687-56572951	-	non-BED genes	No	44.4702	41.3811	45.2188	44.7613	0.703	0.654	0.715	0.708	4.41786	63265
ENSMUSG00000025821	Zfp282	chr6:47877204-47908485	+	non-BED genes	No	27.7576	30.3182	28.9852	25.2751	0.887	0.969	0.927	0.808	4.2636	31282
ENSMUSG00000020718	Polg2	chr11:106768253-106779537	-	non-BED genes	No	5.0138	8.3719	4.7995	4.9103	0.444	0.742	0.425	0.435	32.7638	11285
ENSMUSG00000045750	D830014E11Rik	chr5:105824511-105832434	+	non-BED genes	No	5.15913	5.74073	6.44639	6.40923	0.651	0.724	0.814	0.809	1.05701	7924
ENSMUSG00000022437	Samm50	chr15:84192233-84214303	+	non-BED genes	No	26.3769	30.7966	22.0212	19.3311	1.195	1.395	0.998	0.876	10.9309	22071
ENSMUSG00000074194	Zfp791	chr8:85109647-85119637	-	non-BED genes	No	7.26638	6.09953	5.4112	7.23623	0.727	0.611	0.542	0.724	6.1925	9991
ENSMUSG00000038563	Eftud1	chr7:82648614-82777852	+	non-BED genes	No	94.9715	96.6955	115.188	121.465	0.735	0.748	0.891	0.94	9.731	129239
ENSMUSG00000021327	Zkscan3	chr13:21387013-21402755	-	non-BED genes	No	19.1832	17.1624	18.304	18.1423	1.219	1.09	1.163	1.152	3.65992	15743
ENSMUSG00000057788	Ddx49	chr8:70292866-70302489	-	non-BED genes	No	8.50166	8.5513	6.86987	6.61598	0.883	0.889	0.714	0.687	67.1514	9624
ENSMUSG00000024712	Rfk	chr19:17394043-17401349	+	non-BED genes	No	7.33904	7.53471	8.94024	9.76891	1.004	1.031	1.224	1.337	19.3223	7307
ENSMUSG00000035762	Tmem161b	chr13:84222314-84295870	+	non-BED genes	No	61.6915	57.0485	69.4516	65.643	0.839	0.776	0.944	0.892	32.9635	73557
ENSMUSG00000027109	Sp3	chr2:72936427-72980446	-	non-BED genes	No	22.5984	26.0127	38.6783	44.0893	0.513	0.591	0.879	1.002	2.2495	44020
ENSMUSG00000034321	Exosc1	chr19:41922980-41933314	-	non-BED genes	No	10.3909	9.68749	6.6346	6.25417	1.005	0.937	0.642	0.605	3.44047	10335
ENSMUSG00000026189	Pecr	chr1:72259167-72284314	-	non-BED genes	No	15.1867	16.5644	14.9161	17.7805	0.604	0.659	0.593	0.707	148.44	25148
ENSMUSG00000020080	Hkdc1	chr10:62383137-62422491	-	non-BED genes	No	41.6363	41.5605	32.4672	32.6664	1.058	1.056	0.825	0.83	0.22499	39355
ENSMUSG00000049940	Pgrmc2	chr3:41066326-41083046	-	non-BED genes	No	12.6435	15.3086	20.1391	19.0726	0.756	0.916	1.204	1.141	6.00934	16721
ENSMUSG00000027668	Mfn1	chr3:32529465-32579239	+	non-BED genes	No	28.0482	27.5675	33.126	33.9069	0.564	0.554	0.666	0.681	14.5954	49775
ENSMUSG00000024072	Yipf4	chr17:74489493-74500277	+	non-BED genes	No	7.6297	9.62769	12.9398	11.4746	0.707	0.893	1.2	1.064	1.38464	10785
ENSMUSG00000078994	Zfp429	chr13:67389309-67399767	-	non-BED genes	No	2.10725	3.58796	1.64689	2.37762	0.201	0.343	0.157	0.227	20.4351	10459
ENSMUSG00000020848	Doc2b	chr11:75768966-75796049	-	non-BED genes	No	14.1694	14.591	19.1039	18.6591	0.523	0.539	0.705	0.689	1.4184	27084
ENSMUSG00000023104	Rfc2	chr5:134582690-134598328	+	non-BED genes	No	9.15563	11.6609	8.70497	9.20035	0.585	0.746	0.557	0.588	3.47717	15639
ENSMUSG00000066595	Mfsd7b	chr1:191005832-191026190	-	non-BED genes	No	14.0968	16.5644	17.6923	17.0051	0.692	0.814	0.869	0.835	5.25867	20359
ENSMUSG00000030609	Aen	chr7:78895854-78911209	+	non-BED genes	No	10.1729	11.1825	12.0929	12.9218	0.662	0.728	0.788	0.841	0.92877	15356
ENSMUSG00000028128	F3	chr3:121723537-121735052	+	non-BED genes	No	10.3183	9.86688	10.2578	10.5442	0.896	0.857	0.891	0.916	3.47996	11516
ENSMUSG00000045237	1110012L19Rik	chrX:70385877-70389417	+	non-BED genes	No	4.72314	2.51157	3.34083	2.79112	1.334	0.709	0.943	0.788	7.58784	3541
ENSMUSG00000034210	Efcab14	chr4:115737744-115777327	+	non-BED genes	No	28.8475	32.0524	29.7381	31.581	0.729	0.81	0.751	0.798	7.14863	39584
ENSMUSG00000018921	Pelp1	chr11:70392883-70410031	-	non-BED genes	No	15.9134	18.478	19.7626	18.8659	0.928	1.077	1.152	1.1	6.61116	17149
ENSMUSG00000039512	Uhrf1bp1	chr17:27856490-27900040	+	non-BED genes	No	29.9375	31.2152	36.7962	39.851	0.687	0.717	0.845	0.915	15.2775	43551
ENSMUSG00000000295	Hddc2	chr10:31313382-31328204	+	non-BED genes	No	10.8996	8.7307	10.1166	10.2858	0.735	0.589	0.682	0.694	69.3109	14823
ENSMUSG00000049357	4933408B17Rik	chr18:34579846-34597468	-	non-BED genes	No	5.30446	5.68093	5.64647	8.06323	0.301	0.322	0.32	0.458	20.3604	17623
ENSMUSG00000026240	Cops7b	chr1:86582904-86606978	+	non-BED genes	No	30.9548	29.6604	29.5969	28.7382	1.286	1.232	1.229	1.194	4.31579	24075
ENSMUSG00000022151	Ttc33	chr15:5185525-5218336	+	non-BED genes	No	36.2592	37.853	38.3489	35.5092	1.105	1.154	1.169	1.082	6.69707	32812
ENSMUSG00000022656	Pvrl3	chr16:46387706-46498525	-	non-BED genes	No	127.888	126.296	122.293	123.171	1.154	1.14	1.104	1.111	3.98102	110820
ENSMUSG00000072847	A530017D24Rik	chr11:61864568-61868058	-	non-BED genes	No	1.88926	1.91358	1.8351	1.654	0.541	0.548	0.526	0.474	0.962354	3491
ENSMUSG00000086370	Ftx	chrX:103560907-103623754	-	non-BED genes	No	62.8542	53.4606	30.2086	31.9945	1	0.851	0.481	0.509	2.21921	62848
ENSMUSG00000050052	Tdrp	chr8:13952009-13975032	-	non-BED genes	No	25.5776	28.1655	28.3265	26.9291	1.111	1.223	1.23	1.17	4.37293	23024
ENSMUSG00000025193	Cutc	chr19:43752996-43768638	+	non-BED genes	No	15.9134	11.4815	8.23444	10.6993	1.017	0.734	0.526	0.684	28.1085	15643
ENSMUSG00000009739	Pou6f1	chr15:100575318-100599984	-	non-BED genes	No	12.6435	19.674	14.6338	12.8702	0.513	0.798	0.593	0.522	0.447931	24667
ENSMUSG00000020392	Cdkn2aipnl	chr11:51967661-51977334	+	non-BED genes	No	7.12105	7.59451	5.97585	7.39129	0.736	0.785	0.618	0.764	0.905718	9674
ENSMUSG00000045822	Zswim3	chr2:164805098-164822130	+	non-BED genes	No	18.8926	20.571	19.7156	17.8321	1.109	1.208	1.157	1.047	25.9783	17033
ENSMUSG00000031370	Zrsr2	chrX:163935443-163958661	-	non-BED genes	No	15.1141	16.2056	11.6694	10.2858	0.651	0.698	0.503	0.443	8.05933	23219
ENSMUSG00000034327	Kctd9	chr14:67715937-67742310	+	non-BED genes	No	12.4255	11.0031	16.7041	18.4007	0.471	0.417	0.633	0.698	10.0586	26374
ENSMUSG00000059708	Akap17b	chrX:36608314-36645395	-	non-BED genes	No	24.415	23.5609	24.1857	24.7066	0.658	0.635	0.652	0.666	4.06806	37082
ENSMUSG00000027236	Eif3j1	chr2:122028546-122056598	+	non-BED genes	No	15.0414	18.4182	21.6919	18.5558	0.536	0.657	0.773	0.661	13.8913	28053
ENSMUSG00000090282	Gm17688	chr4:133527731-133529326	-	non-BED genes	No	1.01729	1.43518	1.55278	1.34387	0.637	0.899	0.973	0.842	0.99723	1596
ENSMUSG00000094410	Zbed6	chr1:133619940-133661318	-	non-BED genes	No	43.6709	46.2847	53.265	53.8582	1.055	1.119	1.287	1.302	13.9991	41379
ENSMUSG00000005501	Usp40	chr1:87945121-88008551	-	non-BED genes	No	61.3282	56.3907	56.8882	62.0765	0.967	0.889	0.897	0.979	18.7991	63431
ENSMUSG00000031601	Cnot7	chr8:40492540-40515847	-	non-BED genes	No	26.4496	25.7735	28.0441	25.6886	1.135	1.106	1.203	1.102	0	23308
ENSMUSG00000031201	Brcc3	chrX:75416628-75454001	+	non-BED genes	No	8.21101	7.53471	9.88132	10.3892	0.22	0.202	0.264	0.278	28.5935	37374
ENSMUSG00000023094	Msrb2	chr2:19371440-19394976	+	non-BED genes	No	19.9099	16.086	18.2569	20.2614	0.846	0.683	0.776	0.861	11.3017	23537
ENSMUSG00000040843	Tiprl	chr1:165214922-165236943	-	non-BED genes	No	23.4704	23.4413	19.6215	20.003	1.066	1.064	0.891	0.908	5.46174	22022
ENSMUSG00000020541	Tom1l1	chr11:90643465-90688366	-	non-BED genes	No	57.3317	52.2048	44.9835	49.93	1.277	1.163	1.002	1.112	0.221586	44902
ENSMUSG00000027679	Dnajc19	chr3:34056020-34081321	-	non-BED genes	No	31.7541	31.3946	26.3502	25.2751	1.255	1.241	1.041	0.999	27.9531	25302
ENSMUSG00000056228	Cars2	chr8:11514021-11550771	-	non-BED genes	No	27.6122	31.873	34.3023	31.3742	0.751	0.867	0.933	0.854	35.3014	36751
ENSMUSG00000051934	Spats2	chr15:99126578-99213206	+	non-BED genes	No	52.7539	56.2711	53.5944	54.1167	0.609	0.65	0.619	0.625	6.19664	86629
ENSMUSG00000054280	Prr14l	chr5:32789218-32854256	-	non-BED genes	No	65.688	62.6099	60.3231	60.009	1.01	0.963	0.927	0.923	14.8657	65039
ENSMUSG00000028800	Hdac1	chr4:129516104-129542713	-	non-BED genes	No	19.9099	23.5011	18.1158	16.3849	0.748	0.883	0.681	0.616	3.30366	26610
ENSMUSG00000056851	Pcbp2	chr15:102470632-102500059	+	non-BED genes	No	32.844	32.3514	35.9492	37.525	1.116	1.099	1.222	1.275	1.87726	29428
ENSMUSG00000059555	Tor4a	chr2:25192966-25196886	-	non-BED genes	No	2.97921	4.30555	3.85842	2.94618	0.76	1.098	0.984	0.751	1.79944	3921
ENSMUSG00000002205	Vrk3	chr7:44748413-44777515	+	non-BED genes	No	22.4531	18.3584	24.6563	24.8099	0.772	0.631	0.847	0.852	2.26591	29103
ENSMUSG00000025626	Phf6	chrX:52912266-52956943	+	non-BED genes	No	32.1174	31.4544	24.7974	24.0346	0.719	0.704	0.555	0.538	2.09571	44678
ENSMUSG00000033055	Ankrd54	chr15:79053094-79062893	-	non-BED genes	No	6.75773	10.1061	6.86987	7.28792	0.69	1.031	0.701	0.744	27.9381	9800
ENSMUSG00000037400	Atp11b	chr3:35754134-35856274	+	non-BED genes	No	65.6154	66.736	73.1688	74.5849	0.642	0.653	0.716	0.73	8.54503	102141
ENSMUSG00000001376	Ccdc132	chr6:3498382-3603319	+	non-BED genes	No	53.5532	48.7962	57.4058	66.1598	0.51	0.465	0.547	0.63	32.4232	104938
ENSMUSG00000024044	Epb4.1l3	chr17:69156810-69289985	+	non-BED genes	No	105.871	112.363	134.762	131.906	0.795	0.844	1.012	0.99	0.370202	133176
ENSMUSG00000025728	Pigq	chr17:25926427-25944510	-	non-BED genes	No	22.6711	22.6639	14.4456	12.8702	1.254	1.253	0.799	0.712	0.0247919	18084
ENSMUSG00000078202	Nrarp	chr2:25180758-25183330	+	non-BED genes	No	1.81659	2.09298	2.58797	1.96412	0.706	0.813	1.006	0.763	4.89695	2573
ENSMUSG00000036932	Aifm1	chrX:48474944-48513563	-	non-BED genes	No	11.9895	13.993	10.9636	12.3016	0.31	0.362	0.284	0.319	23.8047	38620
ENSMUSG00000038039	Gcc2	chr10:58255497-58305599	+	non-BED genes	No	30.3735	32.1122	33.5494	34.4238	0.606	0.641	0.67	0.687	2.77116	50103
ENSMUSG00000029390	Tmed2	chr5:124540695-124550506	+	non-BED genes	No	5.37712	6.87692	9.41078	8.78685	0.548	0.701	0.959	0.896	0	9812
ENSMUSG00000057130	Txnl4a	chr18:80206795-80223533	+	non-BED genes	No	13.8788	13.0362	12.7987	12.6634	0.829	0.779	0.765	0.757	10.8815	16739
ENSMUSG00000031090	Nadsyn1	chr7:143795584-143822849	-	non-BED genes	No	16.1314	19.7338	17.9746	18.6591	0.592	0.724	0.659	0.684	56.5456	27266
ENSMUSG00000034290	Nek9	chr12:85299514-85339362	-	non-BED genes	No	33.3527	33.7866	30.6792	28.3764	0.837	0.848	0.77	0.712	4.61314	39849
ENSMUSG00000037416	Dmxl1	chr18:49832670-49965473	+	non-BED genes	No	80.1481	83.3602	87.3791	90.3495	0.604	0.628	0.658	0.68	32.6136	132804
ENSMUSG00000022361	Zhx1	chr15:58047003-58076541	-	non-BED genes	No	23.979	27.4479	28.1382	29.5652	0.812	0.929	0.953	1.001	4.5255	29539
ENSMUSG00000052429	Prmt1	chr7:44975989-44986492	-	non-BED genes	No	11.4082	12.3785	8.70497	7.54635	1.086	1.178	0.829	0.718	8.79757	10504
ENSMUSG00000036966	Spryd3	chr15:102116528-102136234	-	non-BED genes	No	19.7645	28.3449	23.6211	20.7783	1.003	1.438	1.199	1.054	5.77736	19707
ENSMUSG00000027349	Fam98b	chr2:117249739-117271540	+	non-BED genes	No	25.723	27.8665	23.1035	23.1559	1.18	1.278	1.06	1.062	19.8078	21802
ENSMUSG00000071253	Slc25a16	chr10:62920633-62946498	+	non-BED genes	No	18.0933	14.292	16.0924	15.2995	0.7	0.553	0.622	0.591	10.4616	25866
ENSMUSG00000039656	Rxrb	chr17:34031812-34038393	+	non-BED genes	No	6.97572	6.99652	8.56381	6.20248	1.06	1.063	1.301	0.942	0.636438	6582
ENSMUSG00000020250	Txnrd1	chr10:82859206-82897724	+	non-BED genes	No	38.8025	41.3811	37.8313	40.2645	1.007	1.074	0.982	1.045	23.2895	38519
ENSMUSG00000066440	Zfyve26	chr12:79232347-79296282	-	non-BED genes	No	33.716	33.368	31.0085	36.7497	0.527	0.522	0.485	0.575	9.17288	63936
ENSMUSG00000028851	Nudc	chr4:133532542-133545996	-	non-BED genes	No	7.92035	9.98648	10.2107	9.92397	0.589	0.742	0.759	0.738	1.92762	13455
ENSMUSG00000064289	Tank	chr2:61578585-61654171	+	non-BED genes	No	56.4597	45.8063	41.2663	52.1009	0.747	0.606	0.546	0.689	0.0846233	75587
ENSMUSG00000074166	AW146154	chr7:41478880-41499890	-	non-BED genes	No	11.0449	6.51812	7.29336	7.95985	0.526	0.31	0.347	0.379	4.21093	21011
ENSMUSG00000028651	Ppie	chr4:123127115-123139951	-	non-BED genes	No	9.37363	8.1327	9.83427	8.9936	0.73	0.634	0.766	0.701	13.637	12837
ENSMUSG00000025968	Ndufs1	chr1:63143596-63176822	-	non-BED genes	No	31.3907	26.4313	22.4918	23.0526	0.945	0.795	0.677	0.694	9.4253	33227
ENSMUSG00000057421	Las1l	chrX:95935335-95956962	-	non-BED genes	No	14.4601	16.3252	14.7749	14.9893	0.669	0.755	0.683	0.693	23.9502	21628
ENSMUSG00000041124	Msantd4	chr9:4383535-4386861	+	non-BED genes	No	2.03459	1.67438	3.24672	3.10124	0.612	0.503	0.976	0.932	0.519034	3327
ENSMUSG00000025036	Sfxn2	chr19:46573365-46596898	+	non-BED genes	No	12.2802	13.7538	12.3281	14.1106	0.522	0.584	0.524	0.6	40.213	23534
ENSMUSG00000020664	Dld	chr12:31331564-31351437	-	non-BED genes	No	17.8026	15.7272	17.6923	18.4524	0.896	0.791	0.89	0.928	22.1256	19874
ENSMUSG00000074220	Zfp382	chr7:30121942-30134665	+	non-BED genes	No	16.64	15.488	14.2103	16.0748	1.308	1.217	1.117	1.263	10.1253	12724
ENSMUSG00000028743	Akr7a5	chr4:139310744-139318426	+	non-BED genes	No	6.32175	7.59451	9.12846	6.77104	0.823	0.988	1.188	0.881	19.5191	7683
ENSMUSG00000026021	Sumo1	chr1:59639434-59670834	-	non-BED genes	No	19.4012	19.5544	26.8678	26.2572	0.618	0.623	0.856	0.836	28.5829	31401
ENSMUSG00000022751	Nit2	chr16:57156671-57167332	-	non-BED genes	No	10.6816	12.9166	9.12846	9.66554	1.002	1.211	0.856	0.907	22.9158	10662
ENSMUSG00000014550	Zfyve20	chr6:92186712-92214925	-	non-BED genes	No	26.2316	22.6041	17.2688	17.7288	0.93	0.801	0.612	0.628	15.9966	28214
ENSMUSG00000028233	Tgs1	chr4:3574875-3616619	+	non-BED genes	No	26.2316	26.9695	28.2323	31.3742	0.628	0.646	0.676	0.752	17.6618	41745
ENSMUSG00000032458	Copb2	chr9:98563731-98588375	+	non-BED genes	No	20.8545	20.2122	27.1031	27.8078	0.846	0.82	1.1	1.128	36.7028	24645
ENSMUSG00000073733	Rsg1	chr4:141213956-141226756	+	non-BED genes	No	7.6297	5.86033	5.50531	6.30586	0.596	0.458	0.43	0.493	37.178	12801
ENSMUSG00000025060	Slk	chr19:47579678-47645246	+	non-BED genes	No	40.9097	42.8761	58.1116	59.9573	0.624	0.654	0.886	0.914	19.953	65569
ENSMUSG00000022203	Efs	chr14:54916543-54926788	-	non-BED genes	No	3.34253	5.20254	4.70539	3.61812	0.326	0.508	0.459	0.353	10.2288	10246
ENSMUSG00000020516	Rps6kb1	chr11:86498871-86544805	-	non-BED genes	No	35.9686	36.2384	35.2904	33.1316	0.783	0.789	0.768	0.721	11.2022	45935
ENSMUSG00000028706	Nsun4	chr4:116032842-116053876	-	non-BED genes	No	26.6676	26.3117	20.6096	22.4323	1.268	1.251	0.98	1.066	65.432	21035
ENSMUSG00000030835	Nomo1	chr7:46033698-46084212	+	non-BED genes	No	24.3424	26.2519	29.0793	30.7023	0.482	0.52	0.576	0.608	32.2964	50515
ENSMUSG00000057469	E2f6	chr12:16810965-16826743	+	non-BED genes	No	14.6054	19.375	21.0802	18.8659	0.926	1.228	1.336	1.196	1.09278	15779
ENSMUSG00000063275	Ptpla	chr2:13975563-14056135	-	non-BED genes	No	34.152	26.7901	28.797	33.2867	0.424	0.332	0.357	0.413	2.216	80573
ENSMUSG00000019528	Gyg	chr3:20122084-20155317	-	non-BED genes	No	26.8129	32.77	37.9255	41.8151	0.807	0.986	1.141	1.258	2.04677	33234
ENSMUSG00000026879	Gsn	chr2:35279663-35307892	+	non-BED genes	No	12.4255	13.5744	14.2573	15.6096	0.44	0.481	0.505	0.553	0	28230
ENSMUSG00000020648	Dus4l	chr12:31640055-31654826	-	non-BED genes	No	11.8442	10.8237	8.56381	9.09698	0.802	0.733	0.58	0.616	9.4766	14772
ENSMUSG00000051504	Siglech	chr7:55768178-55778925	+	non-BED genes	No	3.12454	2.03318	4.32896	4.54849	0.291	0.189	0.403	0.423	1.01221	10748
ENSMUSG00000048040	Arxes2	chrX:135993820-135995359	+	non-BED genes	No	0.726638	0.717592	1.41162	1.70568	0.472	0.466	0.917	1.108	1.33801	1540
ENSMUSG00000028621	Cyb5rl	chr4:107066988-107088268	+	non-BED genes	No	25.3597	28.4645	24.7033	23.1559	1.192	1.338	1.161	1.088	241.111	21281
ENSMUSG00000025323	Sp4	chr12:118234933-118301440	-	non-BED genes	No	32.9894	28.8233	60.9819	61.0428	0.496	0.433	0.917	0.918	4.53746	66508
ENSMUSG00000041268	Dmxl2	chr9:54365158-54501760	-	non-BED genes	Yes	135.445	152.967	165.395	165.4	0.992	1.12	1.211	1.211	14.406	136603
ENSMUSG00000029454	Mapkapk5	chr5:121518613-121545905	-	non-BED genes	No	17.73	24.0991	26.6325	24.6032	0.65	0.883	0.976	0.901	0.991198	27293
ENSMUSG00000072972	Adam4	chr12:81419443-81421946	-	non-BED genes	No	0.290655	0.418595	0.752863	0.671936	0.116	0.167	0.301	0.268	1.15515	2504
ENSMUSG00000029575	Mmab	chr5:114431034-114444059	-	non-BED genes	No	10.4636	7.65431	8.42265	8.47673	0.803	0.588	0.647	0.651	9.21709	13026
ENSMUSG00000046637	Ttc34	chr4:154856200-154867125	+	non-BED genes	No	10.0276	8.1925	6.58755	6.09911	0.918	0.75	0.603	0.558	10.7413	10926
ENSMUSG00000033006	Sox10	chr15:79154913-79164490	-	non-BED genes	No	3.48786	3.76736	7.43452	5.01367	0.364	0.393	0.776	0.523	1.10077	9578
ENSMUSG00000024993	Fam45a	chr19:60811585-60836227	+	non-BED genes	No	16.204	17.88	14.3044	14.7309	0.658	0.726	0.58	0.598	38.2958	24643
ENSMUSG00000001150	Mcm3ap	chr10:76468971-76515856	+	non-BED genes	No	44.0342	50.5902	50.8653	49.6199	0.939	1.079	1.085	1.058	43.9755	46886
ENSMUSG00000020990	Cdkl1	chr12:69746848-69790707	-	non-BED genes	No	47.9581	47.8992	50.8182	50.0334	1.093	1.092	1.159	1.141	8.99104	43860
ENSMUSG00000039838	Slc45a1	chr4:150628572-150652174	-	non-BED genes	No	28.8475	27.6273	27.4795	23.9829	1.222	1.17	1.164	1.016	12.4054	23603
ENSMUSG00000024594	Prrc1	chr18:57354733-57392719	+	non-BED genes	No	22.1624	24.1589	34.3023	34.217	0.583	0.636	0.903	0.901	1.9736	37987
ENSMUSG00000038733	Wdr26	chr1:181173228-181211552	-	non-BED genes	No	23.5431	25.3549	29.2205	30.8574	0.614	0.662	0.762	0.805	0.665499	38325
ENSMUSG00000026568	Mpc2	chr1:165461037-165481214	+	non-BED genes	No	24.2697	22.5443	24.3269	23.3627	1.203	1.117	1.206	1.158	6.27664	20178
ENSMUSG00000021639	Gtf2h2	chr13:100460218-100492579	-	non-BED genes	No	17.076	20.272	14.9631	16.0748	0.528	0.626	0.462	0.497	18.3746	32362
ENSMUSG00000031358	Msl3	chrX:168654117-168673898	-	non-BED genes	No	18.4566	15.3086	11.1518	10.3375	0.933	0.774	0.564	0.523	1.79654	19782
ENSMUSG00000035614	Fam179b	chr12:64965742-65022573	+	non-BED genes	No	53.5532	56.3309	56.7	52.9279	0.942	0.991	0.998	0.931	12.1308	56832
ENSMUSG00000033192	Lpcat2	chr8:92855350-92919279	+	non-BED genes	No	32.19	32.5906	40.3723	40.4195	0.504	0.51	0.632	0.632	154.899	63930
ENSMUSG00000029167	Ppargc1a	chr5:51454249-51567725	-	non-BED genes	No	57.4044	53.1616	75.3333	76.4973	0.506	0.468	0.664	0.674	1.88453	113477
ENSMUSG00000037625	Cldn11	chr3:31149946-31164324	+	non-BED genes	No	5.52245	5.14274	9.69311	9.25204	0.384	0.358	0.674	0.643	0.997093	14379
ENSMUSG00000002459	Rgs20	chr1:4909576-5070285	-	non-BED genes	No	82.9094	73.2541	93.5902	98.1543	0.516	0.456	0.582	0.611	0.0761897	160710
ENSMUSG00000033184	Tmed7	chr18:46560235-46597535	-	non-BED genes	No	17.0033	19.674	24.7033	25.3268	0.456	0.527	0.662	0.679	3.62136	37301
ENSMUSG00000022064	Pibf1	chr14:99099433-99254493	+	non-BED genes	No	79.7848	83.121	93.5902	101.979	0.515	0.536	0.604	0.658	0.502547	155061
ENSMUSG00000033819	Ppp1r16a	chr15:76671615-76694919	+	non-BED genes	No	16.2767	18.3584	15.9042	14.5758	0.698	0.788	0.682	0.625	8.9018	23305
ENSMUSG00000037656	Slc20a2	chr8:22476700-22569607	+	non-BED genes	No	74.771	86.3502	101.495	99.2914	0.805	0.929	1.092	1.069	33.2026	92908
ENSMUSG00000027194	Ttc17	chr2:94300767-94406689	-	non-BED genes	No	76.8056	84.616	102.013	105.649	0.725	0.799	0.963	0.997	7.74124	105923
ENSMUSG00000033111	3830406C13Rik	chr14:12284209-12303231	+	non-BED genes	No	21.9445	24.8167	21.4566	22.7941	1.154	1.305	1.128	1.198	28.689	19023
ENSMUSG00000028416	Bag1	chr4:40936398-40948281	-	non-BED genes	No	9.37363	8.96989	11.34	11.733	0.789	0.755	0.954	0.987	2.60539	11884
ENSMUSG00000031860	Pbx4	chr8:69832624-69872292	+	non-BED genes	No	35.8232	38.6901	43.9484	44.0893	0.903	0.975	1.108	1.111	7.76845	39669
ENSMUSG00000028191	Bcl10	chr3:145924378-145934283	+	non-BED genes	No	10.3183	9.86688	9.97543	10.4925	1.042	0.996	1.007	1.059	10.8712	9906
ENSMUSG00000022639	5330426P16Rik	chr16:50727966-50732743	-	non-BED genes	No	3.92384	4.96334	5.59942	6.20248	0.821	1.039	1.172	1.298	71.8611	4778
ENSMUSG00000090213	Tmem189	chr2:167642608-167689822	-	non-BED genes	No	39.1658	45.5073	46.4422	42.7971	0.83	0.964	0.984	0.906	1.08234	47215
ENSMUSG00000054302	Eapp	chr12:54670340-54695897	-	non-BED genes	No	19.9099	18.6574	16.3748	19.5378	0.779	0.73	0.641	0.764	7.0359	25558
ENSMUSG00000091625	Lsm5	chr6:56701063-56704692	-	non-BED genes	No	3.12454	1.67438	2.4468	2.27424	0.861	0.461	0.674	0.627	17.1012	3630
ENSMUSG00000029203	Ube2k	chr5:65537233-65598988	+	non-BED genes	No	47.0135	47.8394	62.1582	64.7126	0.761	0.775	1.007	1.048	15.3397	61756
ENSMUSG00000068134	Zfp120	chr2:150114406-150136708	-	non-BED genes	No	9.80961	9.26889	10.8224	13.1286	0.44	0.416	0.485	0.589	13.6903	22303
ENSMUSG00000024038	Ndufv3	chr17:31520115-31531321	+	non-BED genes	No	12.5708	14.6508	11.7635	13.0769	1.122	1.307	1.05	1.167	21.6922	11207
ENSMUSG00000028719	Cmpk1	chr4:114959336-114987241	-	non-BED genes	No	17.4393	15.7272	20.4685	22.2773	0.625	0.564	0.733	0.798	9.77755	27906
ENSMUSG00000059409	Ppp2r5d	chr17:46682991-46705002	-	non-BED genes	No	18.6019	29.4811	24.1857	22.2256	0.845	1.339	1.099	1.01	30.6675	22012
ENSMUSG00000029173	Sepsecs	chr5:52640087-52669729	-	non-BED genes	No	20.2732	22.6041	37.2667	37.5767	0.684	0.763	1.257	1.268	5.20115	29643
ENSMUSG00000074886	Grk6	chr13:55445334-55460925	+	non-BED genes	No	14.8234	17.6408	18.5392	16.5916	0.951	1.131	1.189	1.064	3.90974	15592
ENSMUSG00000037905	Bri3bp	chr5:125441568-125460872	+	non-BED genes	No	20.8545	23.2619	26.3031	23.3627	1.08	1.205	1.363	1.21	2.60085	19305
ENSMUSG00000039068	Zzz3	chr3:152395473-152462826	+	non-BED genes	No	64.8887	69.8456	84.7912	84.7156	0.963	1.037	1.259	1.258	7.54116	67354
ENSMUSG00000098066	Gm26944	chr7:92639739-92647442	+	non-BED genes	No	8.50166	9.38849	9.69311	10.079	1.104	1.219	1.258	1.308	0.554875	7704
ENSMUSG00000025903	Lypla1	chr1:4807788-4886770	+	non-BED genes	No	51.4459	52.9224	61.076	61.4046	0.651	0.67	0.773	0.777	2.91042	78983
ENSMUSG00000034255	Arhgap27	chr11:103331497-103363692	-	non-BED genes	No	31.1728	37.1354	27.8559	28.0662	0.968	1.153	0.865	0.872	14.3493	32196
ENSMUSG00000079043	Fastkd5	chr2:130613840-130630027	-	non-BED genes	No	17.4393	15.0096	16.563	15.6613	1.077	0.927	1.023	0.967	4.54346	16188
ENSMUSG00000016984	Etaa1	chr11:17938756-17953875	-	non-BED genes	No	8.57432	8.7307	15.8572	15.041	0.567	0.577	1.049	0.995	46.2823	15120
ENSMUSG00000025651	Uqcrc1	chr9:108936648-108949640	+	non-BED genes	No	16.9307	14.8302	17.6452	15.2995	1.303	1.141	1.358	1.178	2.63585	12993
ENSMUSG00000049687	Fam109b	chr15:82338942-82345743	+	non-BED genes	No	4.79581	5.50153	3.29377	3.61812	0.705	0.809	0.484	0.532	179.342	6802
ENSMUSG00000032902	Slc16a1	chr3:104638668-104658462	+	non-BED genes	No	20.9272	24.2785	23.1976	22.1739	1.057	1.226	1.172	1.12	10.3506	19795
ENSMUSG00000057265	Ccdc176	chr12:84409071-84433780	+	non-BED genes	No	19.9825	18.5378	15.1984	14.7826	0.809	0.75	0.615	0.598	3.89998	24710
ENSMUSG00000026917	Wdr5	chr2:27515157-27536535	+	non-BED genes	No	16.204	18.4182	15.8101	14.9376	0.758	0.862	0.74	0.699	3.14168	21379
ENSMUSG00000031529	Tnks	chr8:34829179-34965690	-	non-BED genes	No	109.65	120.615	145.302	137.54	0.803	0.884	1.064	1.008	1.06782	136512
ENSMUSG00000045078	Rnf216	chr5:142990893-143113020	-	non-BED genes	No	85.6706	94.2437	99.519	103.168	0.701	0.772	0.815	0.845	53.1502	122128
ENSMUSG00000021024	Psma6	chr12:55384222-55418454	+	non-BED genes	No	24.633	25.0559	27.5736	28.6348	0.72	0.732	0.805	0.836	0.492615	34233
ENSMUSG00000037344	Slc12a9	chr5:137314558-137333597	-	non-BED genes	No	12.8615	13.5744	15.5278	14.059	0.675	0.713	0.816	0.738	8.88094	19040
ENSMUSG00000029276	Glmn	chr5:107548967-107597888	-	non-BED genes	No	35.6779	34.9228	31.9026	28.9966	0.729	0.714	0.652	0.593	3.01715	48922
ENSMUSG00000060739	Nsa2	chr13:97129427-97137926	-	non-BED genes	No	8.57432	8.4915	5.59942	6.92611	1.009	0.999	0.659	0.815	4.97976	8500
ENSMUSG00000003526	Prodh	chr16:18060357-18090203	-	non-BED genes	No	31.0274	34.0258	34.2552	32.0462	1.04	1.14	1.148	1.074	0	29847
ENSMUSG00000027422	Rrbp1	chr2:143947395-144011263	-	non-BED genes	No	32.9894	35.1022	45.407	53.3414	0.517	0.55	0.711	0.835	11.4084	63869
ENSMUSG00000055305	Zfp93	chr7:24270420-24276827	+	non-BED genes	No	4.65048	5.26234	5.50531	4.60018	0.726	0.821	0.859	0.718	9.69534	6408
ENSMUSG00000042510	AA986860	chr1:130731976-130744621	+	non-BED genes	No	12.4982	12.797	15.3866	14.886	0.988	1.012	1.217	1.177	0.71233	12646
ENSMUSG00000020424	Gatsl3	chr11:4218225-4222409	+	non-BED genes	No	4.50515	5.38194	5.08182	4.4968	1.077	1.286	1.214	1.075	11.487	4185
ENSMUSG00000025421	Hdhd2	chr18:76930126-76972902	+	non-BED genes	No	53.6985	43.8927	45.5952	41.8668	1.255	1.026	1.066	0.979	20.0318	42777
ENSMUSG00000022779	Top3b	chr16:16870736-16892990	+	non-BED genes	No	24.3424	25.4147	17.5511	18.7108	1.094	1.142	0.789	0.841	4.03041	22255
ENSMUSG00000024346	Pfdn1	chr18:36403679-36454495	-	non-BED genes	No	38.5118	42.2183	57.2176	53.5481	0.758	0.831	1.126	1.054	11.8234	50817
ENSMUSG00000040549	Ckap5	chr2:91526762-91620664	+	non-BED genes	No	77.8956	87.905	67.8047	70.2948	0.83	0.936	0.722	0.749	12.6913	93903
ENSMUSG00000029201	Ugdh	chr5:65413202-65435946	-	non-BED genes	No	21.5085	25.5343	16.5159	18.7108	0.946	1.123	0.726	0.823	4.70705	22745
ENSMUSG00000021754	Map3k1	chr13:111746428-111808993	-	non-BED genes	No	21.6538	17.3418	39.1018	43.1589	0.346	0.277	0.625	0.69	11.0379	62566
ENSMUSG00000028228	Cpne3	chr4:19519254-19570108	-	non-BED genes	No	31.2454	35.8796	34.5846	38.0419	0.614	0.706	0.68	0.748	13.0847	50855
ENSMUSG00000097517	Gm26695	chr17:23556769-23558313	+	non-BED genes	No	0.435983	0.956789	0.705809	0.723623	0.282	0.619	0.457	0.468	2.58183	1545
ENSMUSG00000035877	Zhx3	chr2:160748708-160872998	-	non-BED genes	No	96.6428	110.928	119.799	120.793	0.778	0.892	0.964	0.972	6.74031	124291
ENSMUSG00000000976	Heatr6	chr11:83753696-83783754	+	non-BED genes	No	29.5742	28.8233	21.6919	23.2593	0.984	0.959	0.722	0.774	3.43292	30059
ENSMUSG00000027430	Dtd1	chr2:144599897-144768758	+	non-BED genes	No	109.868	109.612	151.608	152.788	0.651	0.649	0.898	0.905	19.1052	168862
ENSMUSG00000017485	Top2b	chr14:16365179-16430787	+	non-BED genes	No	64.5981	61.7129	60.3231	59.2337	0.985	0.941	0.919	0.903	32.9725	65609
ENSMUSG00000025184	R3hcc1l	chr19:42518759-42592343	+	non-BED genes	No	43.0896	45.9857	57.6881	61.508	0.586	0.625	0.784	0.836	48.6965	73585
ENSMUSG00000026249	Serpine2	chr1:79794197-79858696	-	non-BED genes	No	55.8058	52.6234	60.5113	64.2474	0.865	0.816	0.938	0.996	3.60935	64500
ENSMUSG00000026018	Ica1l	chr1:59989070-60043087	-	non-BED genes	No	33.6433	37.1354	34.6317	35.0957	0.623	0.687	0.641	0.65	5.8894	54018
ENSMUSG00000073576	9630014M24Rik	chr18:38601534-38645922	+	non-BED genes	No	27.3942	26.5509	27.1972	31.5293	0.617	0.598	0.613	0.71	6.26358	44389
ENSMUSG00000039463	Slc9a8	chr2:167421712-167477000	+	non-BED genes	No	53.5532	63.8656	61.4995	57.7865	0.969	1.155	1.112	1.045	6.04039	55289
ENSMUSG00000073293	Nudt10	chrX:6168696-6173015	-	non-BED genes	No	5.15913	3.58796	4.28191	5.42717	1.194	0.831	0.991	1.256	0.322604	4320
ENSMUSG00000031637	Lrp2bp	chr8:45999303-46029477	+	non-BED genes	No	33.28	25.2951	18.9157	19.5378	1.103	0.838	0.627	0.647	8.79064	30175
ENSMUSG00000046671	Mtfr1l	chr4:134525550-134535387	-	non-BED genes	No	5.52245	8.4317	7.95211	7.70142	0.561	0.857	0.808	0.783	4.66558	9838
ENSMUSG00000006205	Htra1	chr7:130936111-130985660	+	non-BED genes	No	38.0032	43.4741	51.7123	51.739	0.767	0.877	1.044	1.044	5.85143	49550
ENSMUSG00000030970	Ctbp2	chr7:132987563-133124354	-	non-BED genes	No	97.0788	104.23	138.244	143.071	0.71	0.762	1.011	1.046	0.895805	136792
ENSMUSG00000039065	Fam173b	chr15:31601852-31621227	+	non-BED genes	No	15.8407	12.9166	10.0695	11.0611	0.818	0.667	0.52	0.571	3.45529	19376
ENSMUSG00000026153	Fam135a	chr1:24010758-24100341	-	non-BED genes	No	57.8404	55.9123	71.8984	77.7378	0.646	0.624	0.803	0.868	34.8864	89584
ENSMUSG00000039886	Tmem120a	chr5:135735485-135744271	-	non-BED genes	No	10.6089	10.1061	7.34041	8.47673	1.207	1.15	0.835	0.965	10.4568	8787
ENSMUSG00000031392	Irak1	chrX:74013914-74023918	-	non-BED genes	No	10.9722	12.4981	8.65792	6.77104	1.097	1.249	0.865	0.677	2.41694	10005
ENSMUSG00000028337	Coro2a	chr4:46536937-46602202	-	non-BED genes	No	47.4494	55.4937	56.0412	53.4447	0.727	0.85	0.859	0.819	1.61124	65266
ENSMUSG00000038206	Fbxo8	chr8:56551090-56592393	+	non-BED genes	No	32.1174	26.6107	31.2909	35.1474	0.778	0.644	0.758	0.851	9.03771	41304
ENSMUSG00000035576	L3mbtl1	chr2:162943472-162974522	+	non-BED genes	No	23.3977	26.7901	22.68	21.7604	0.754	0.863	0.73	0.701	14.6317	31051
ENSMUSG00000034000	Neu4	chr1:94020493-94028326	+	non-BED genes	No	2.90655	3.46836	5.27004	4.80692	0.371	0.443	0.673	0.614	4.70677	7834
ENSMUSG00000028869	Gnl2	chr4:125016585-125055380	+	non-BED genes	No	45.7055	50.8294	42.2544	39.2307	1.178	1.31	1.089	1.011	0	38796
ENSMUSG00000027714	Exosc9	chr3:36552606-36565729	+	non-BED genes	No	11.7715	12.7372	11.6694	9.61385	0.897	0.971	0.889	0.733	18.5245	13124
ENSMUSG00000031820	Babam1	chr8:71396855-71404772	+	non-BED genes	No	10.3909	9.68749	5.88174	5.01367	1.312	1.223	0.743	0.633	5.0424	7918
ENSMUSG00000054752	Fsd1l	chr4:53631471-53707009	+	non-BED genes	No	51.1553	49.753	66.1107	71.4319	0.677	0.659	0.875	0.946	12.8468	75539
ENSMUSG00000030521	Mphosph10	chr7:64376576-64392268	-	non-BED genes	No	18.7473	16.983	14.4926	13.9039	1.195	1.082	0.924	0.886	34.4232	15693
ENSMUSG00000039345	Mettl22	chr16:8470788-8490684	+	non-BED genes	No	13.2248	13.993	10.9636	12.7151	0.665	0.703	0.551	0.639	8.39026	19897
ENSMUSG00000027522	Stx16	chr2:174076308-174099771	+	non-BED genes	No	17.8026	18.4182	26.209	26.2572	0.759	0.785	1.117	1.119	6.6449	23464
ENSMUSG00000032563	Mrpl3	chr9:105053239-105077466	+	non-BED genes	No	20.7818	25.5343	22.0683	22.6908	0.858	1.054	0.911	0.937	12.1298	24228
ENSMUSG00000025860	Xiap	chrX:42059679-42109656	+	non-BED genes	No	26.4496	23.1423	22.68	24.1897	0.529	0.463	0.454	0.484	0	49978
ENSMUSG00000020537	Drg2	chr11:60454591-60468754	+	non-BED genes	No	12.0622	12.3187	9.12846	10.3375	0.852	0.87	0.644	0.73	6.72989	14164
ENSMUSG00000029208	Guf1	chr5:69556924-69575972	+	non-BED genes	No	17.948	16.1458	14.7279	15.6096	0.942	0.848	0.773	0.819	13.9729	19049
ENSMUSG00000096768	Erdr1	chrY:90784738-90816464	+	non-BED genes	No	23.1071	34.3846	22.3977	28.2213	0.728	1.084	0.706	0.89	0	31727
ENSMUSG00000097890	4930547M16Rik	chr10:39899329-39907931	+	non-BED genes	No	4.57782	3.34876	3.10556	3.61812	0.532	0.389	0.361	0.421	54.0671	8603
ENSMUSG00000036036	Zfp57	chr17:37001163-37010635	+	non-BED genes	No	8.35633	9.80708	6.16406	7.95985	0.882	1.035	0.651	0.84	0	9473
ENSMUSG00000021548	Ccnh	chr13:85189408-85223469	+	non-BED genes	No	32.4807	34.4444	35.7139	34.7856	0.954	1.011	1.048	1.021	25.0598	34062
ENSMUSG00000026743	Mllt10	chr2:18055237-18212388	+	non-BED genes	No	148.161	157.392	142.009	139.246	0.943	1.002	0.904	0.886	1.26514	157152
ENSMUSG00000037373	Ctbp1	chr5:33247724-33275004	-	non-BED genes	No	34.8059	35.162	31.1967	29.1517	1.276	1.289	1.144	1.069	2.6833	27281
ENSMUSG00000056014	A430033K04Rik	chr5:138622859-138648903	+	non-BED genes	No	19.4012	19.9132	20.6096	19.4344	0.745	0.765	0.791	0.746	17.7509	26045
ENSMUSG00000086568	9130020K20Rik	chr4:136347286-136350334	+	non-BED genes	No	2.54323	1.97338	1.2234	1.86075	0.834	0.647	0.401	0.61	0.979504	3049
ENSMUSG00000035824	Tk2	chr8:104226691-104248558	-	non-BED genes	No	22.4531	26.7303	21.0331	21.6053	1.027	1.222	0.962	0.988	8.32554	21868
ENSMUSG00000024132	Eci1	chr17:24426683-24439316	+	non-BED genes	No	9.2283	8.7905	6.06995	7.49467	0.73	0.696	0.48	0.593	27.4869	12634
ENSMUSG00000028646	Rragc	chr4:123917446-123936997	+	non-BED genes	No	15.1141	17.3418	21.3154	21.2435	0.773	0.887	1.09	1.087	2.93601	19552
ENSMUSG00000053985	Zfp14	chr7:30038053-30044734	-	non-BED genes	No	5.74044	7.47491	5.83469	6.30586	0.859	1.119	0.873	0.944	3.0117	6682
ENSMUSG00000028165	Cisd2	chr3:135406412-135423925	-	non-BED genes	No	22.1624	18.2986	15.9042	17.522	1.265	1.045	0.908	1	0.601104	17514
ENSMUSG00000025465	Echs1	chr7:140105710-140116476	-	non-BED genes	No	13.0795	11.0031	6.11701	5.01367	1.215	1.022	0.568	0.466	25.172	10767
ENSMUSG00000090061	3110047P20Rik	chr5:63649103-63810546	+	non-BED genes	No	184.348	186.095	179.934	176.047	1.142	1.153	1.115	1.09	2.26299	161444
ENSMUSG00000026615	Eprs	chr1:185363095-185428355	+	non-BED genes	No	33.716	37.255	41.925	39.6959	0.517	0.571	0.642	0.608	14.7208	65261
ENSMUSG00000052914	Cyp2j6	chr4:96516138-96553661	-	non-BED genes	No	20.3459	18.179	21.5977	22.9492	0.542	0.484	0.576	0.612	34.4649	37524
ENSMUSG00000024805	Pcgf5	chr19:36379067-36456192	+	non-BED genes	No	36.5499	38.5705	51.9475	54.6335	0.474	0.5	0.674	0.708	1.98418	77126
ENSMUSG00000021488	Nsd1	chr13:55209782-55318325	+	non-BED genes	Yes	114.663	133.293	129.257	124.825	1.056	1.228	1.191	1.15	0.581645	108544
ENSMUSG00000027288	Zfp106	chr2:120506820-120563843	-	non-BED genes	No	41.055	40.6037	37.2196	38.8172	0.72	0.712	0.653	0.681	53.436	57024
ENSMUSG00000030655	Smg1	chr7:118131308-118243637	-	non-BED genes	No	106.525	112.901	110.059	109.526	0.948	1.005	0.98	0.975	5.04598	112330
ENSMUSG00000047603	Zfp235	chr7:24134174-24142266	+	non-BED genes	No	7.99301	7.89351	7.62273	7.33961	0.988	0.975	0.942	0.907	7.44474	8093
ENSMUSG00000025266	Gnl3l	chrX:150983141-151017322	-	non-BED genes	No	26.3769	28.0459	29.0323	27.7561	0.772	0.82	0.849	0.812	8.73284	34182
ENSMUSG00000042570	Mier2	chr10:79540245-79555199	-	non-BED genes	No	12.2802	12.6774	14.4456	13.232	0.821	0.848	0.966	0.885	3.46089	14955
ENSMUSG00000028436	Dcaf12	chr4:41291300-41314889	-	non-BED genes	No	27.7576	30.976	30.3027	28.273	1.177	1.313	1.285	1.199	3.0538	23590
ENSMUSG00000029625	Cpsf4	chr5:145167213-145182041	+	non-BED genes	No	11.5535	14.89	11.9046	12.9735	0.779	1.004	0.803	0.875	6.79256	14829
ENSMUSG00000022974	Paxbp1	chr16:91014037-91044543	-	non-BED genes	No	32.0447	37.4344	30.3968	31.2709	1.05	1.227	0.996	1.025	19.6298	30507
ENSMUSG00000001120	Pcbp3	chr10:76761857-76961887	-	non-BED genes	No	158.48	186.693	210.519	211.763	0.792	0.933	1.052	1.059	37.475	200031
ENSMUSG00000034334	Fam151b	chr13:92449622-92484031	-	non-BED genes	No	19.9099	18.3584	17.9746	20.2098	0.579	0.534	0.522	0.587	10.5217	34410
ENSMUSG00000092541	Gm20537	chr9:88407432-88456616	-	non-BED genes	No	45.1969	45.6269	41.5486	44.7096	0.919	0.928	0.845	0.909	1.56616	49185
ENSMUSG00000029723	Tsc22d4	chr5:137745730-137768450	+	non-BED genes	No	20.4912	24.3383	22.0212	18.6591	0.902	1.071	0.969	0.821	6.63197	22721
ENSMUSG00000028563	Tm2d1	chr4:98355370-98383306	-	non-BED genes	No	33.716	29.8996	28.3265	31.3225	1.207	1.07	1.014	1.121	53.1586	27937
ENSMUSG00000020078	Vps26a	chr10:62454843-62486805	-	non-BED genes	No	20.3459	26.0127	23.9504	22.1739	0.637	0.814	0.749	0.694	11.0457	31963
ENSMUSG00000026784	Pdss1	chr2:22895522-22940266	+	non-BED genes	No	39.5291	36.2384	36.6079	37.1632	0.883	0.81	0.818	0.831	7.57079	44745
ENSMUSG00000087279	4930544D05Rik	chr11:70615848-70616890	+	non-BED genes	No	0.653974	1.19599	0.752863	1.08543	0.627	1.147	0.722	1.041	0.730935	1043
ENSMUSG00000060538	Tmem219	chr7:126886171-126922917	-	non-BED genes	No	32.19	34.863	22.4447	23.311	0.876	0.949	0.611	0.634	0.167201	36747
ENSMUSG00000027452	Acss1	chr2:150618105-150668500	-	non-BED genes	No	48.5394	46.6434	49.0302	46.0534	0.963	0.926	0.973	0.914	3.10511	50396
ENSMUSG00000023873	1700010I14Rik	chr17:8988333-9008319	+	non-BED genes	No	8.13834	9.26889	13.6456	14.9376	0.407	0.464	0.683	0.747	25.4463	19987
ENSMUSG00000021303	Gng4	chr13:13784059-13827897	+	non-BED genes	No	27.9029	27.5077	40.2782	40.833	0.636	0.627	0.919	0.931	2.48154	43839
ENSMUSG00000025272	Tro	chrX:150645304-150657583	-	non-BED genes	No	17.294	12.5579	8.4697	9.04529	1.408	1.023	0.69	0.737	1.0634	12280
ENSMUSG00000034820	Cpsf7	chr19:10525244-10547735	+	non-BED genes	No	18.8926	20.5112	20.6096	20.2614	0.84	0.912	0.916	0.901	2.09747	22492
ENSMUSG00000020752	Recql5	chr11:115892595-115933477	-	non-BED genes	No	28.1209	35.7002	33.7377	32.9248	0.688	0.873	0.825	0.805	41.7395	40883
ENSMUSG00000026781	Acbd5	chr2:23068168-23114510	+	non-BED genes	No	38.6571	31.6338	22.4918	23.8796	0.834	0.683	0.485	0.515	19.9985	46343
ENSMUSG00000028479	Gne	chr4:44034075-44084177	-	non-BED genes	No	49.484	53.341	46.5363	49.0513	0.988	1.065	0.929	0.979	0	50103
ENSMUSG00000028403	Zdhhc21	chr4:82798738-82859958	-	non-BED genes	No	68.8853	72.2973	69.2634	69.6746	1.125	1.181	1.131	1.138	0.775553	61221
ENSMUSG00000027669	Gnb4	chr3:32580332-32616585	-	non-BED genes	No	26.159	28.9429	36.8903	37.0598	0.722	0.798	1.018	1.022	6.27352	36254
ENSMUSG00000027811	4930579G24Rik	chr3:79629079-79632817	+	non-BED genes	No	2.83389	2.81057	2.11743	2.58437	0.758	0.752	0.566	0.691	65.4509	3739
ENSMUSG00000053581	Zfand2a	chr5:139471211-139484549	-	non-BED genes	No	14.5328	18.2986	13.2692	13.4904	1.089	1.372	0.995	1.011	6.25778	13339
ENSMUSG00000097333	Zfp87	chr13:67515781-67526177	-	non-BED genes	No	11.2629	8.96989	8.79908	8.89023	1.083	0.863	0.846	0.855	10.0472	10397
ENSMUSG00000031393	Mecp2	chrX:74026592-74135363	-	non-BED genes	Yes	43.7436	42.3379	62.5817	61.0428	0.402	0.389	0.575	0.561	0	108772
ENSMUSG00000054199	Gon4l	chr3:88835231-88910103	+	non-BED genes	No	40.1831	48.258	43.5719	38.9206	0.537	0.645	0.582	0.52	0.534795	74873
ENSMUSG00000054499	Dedd2	chr7:25202840-25219859	-	non-BED genes	No	16.4947	20.87	15.3866	15.3511	0.969	1.226	0.904	0.902	21.5085	17020
ENSMUSG00000004099	Dnmt1	chr9:20907206-20959888	-	non-BED genes	No	35.5326	41.3213	30.7262	29.5135	0.674	0.784	0.583	0.56	0	52683
ENSMUSG00000041119	Pde9a	chr17:31386234-31476310	+	non-BED genes	No	97.3694	110.09	115.753	116.917	1.081	1.222	1.285	1.298	1.54466	90077
ENSMUSG00000079610	Ankrd39	chr1:36538173-36547201	-	non-BED genes	No	10.1003	12.6177	8.51676	10.5442	1.119	1.397	0.943	1.168	5.97046	9029
ENSMUSG00000021578	Ccdc127	chr13:74350309-74365783	+	non-BED genes	No	15.55	15.9664	19.9038	18.0389	1.005	1.032	1.286	1.166	7.9914	15475
ENSMUSG00000019837	Gtf3c6	chr10:40249203-40257665	-	non-BED genes	No	8.93764	8.6709	5.31709	5.78898	1.056	1.025	0.628	0.684	17.2758	8463
ENSMUSG00000037674	Rfx7	chr9:72532240-72622937	+	non-BED genes	No	63.7261	64.045	71.9454	68.2273	0.703	0.706	0.793	0.752	7.04012	90698
ENSMUSG00000074698	Csnk2a1	chr2:152226839-152281852	+	non-BED genes	No	42.7263	45.2083	50.7712	48.0692	0.777	0.822	0.923	0.874	1.27621	55014
ENSMUSG00000051890	Klhdc1	chr12:69241176-69284632	+	non-BED genes	No	25.5776	25.9529	23.1035	22.7941	0.589	0.597	0.532	0.525	0.482075	43457
ENSMUSG00000037808	Fam76b	chr9:13827716-13846541	+	non-BED genes	No	19.6919	18.5976	18.5863	17.4186	1.046	0.988	0.987	0.925	8.02662	18826
ENSMUSG00000027002	Nckap1	chr2:80500512-80581380	-	non-BED genes	No	86.3972	91.7919	101.731	107.716	1.068	1.135	1.258	1.332	0.686472	80869
ENSMUSG00000029267	Mtf2	chr5:108065674-108109004	+	non-BED genes	No	39.8924	39.8263	44.4189	42.2803	0.921	0.919	1.025	0.976	19.0424	43331
ENSMUSG00000029141	Slc4a1ap	chr5:31526995-31554042	+	non-BED genes	No	17.076	15.0096	18.4451	17.1085	0.631	0.555	0.682	0.633	1.49027	27048
ENSMUSG00000026782	Abi2	chr1:60409619-60481162	+	non-BED genes	No	77.0963	85.812	88.8378	87.6101	1.078	1.199	1.242	1.225	8.18815	71544
ENSMUSG00000023143	Nagpa	chr16:5195289-5204012	-	non-BED genes	No	9.2283	9.80708	8.79908	7.80479	1.058	1.124	1.009	0.895	6.6386	8724
ENSMUSG00000029670	Ing3	chr6:21949571-21976038	+	non-BED genes	No	20.4912	20.0328	19.4803	19.7963	0.774	0.757	0.736	0.748	3.27707	26468
ENSMUSG00000030059	Tmf1	chr6:97155266-97179124	-	non-BED genes	No	16.0587	15.0694	18.4451	17.6254	0.673	0.632	0.773	0.739	4.8988	23859
ENSMUSG00000032449	Slc25a36	chr9:97075597-97111157	-	non-BED genes	No	20.6365	23.2619	26.3031	27.3943	0.58	0.654	0.74	0.77	3.53419	35561
ENSMUSG00000040097	Flywch1	chr17:23755423-23771591	-	non-BED genes	No	16.7127	22.9629	12.7516	14.1623	1.034	1.42	0.789	0.876	6.65525	16169
ENSMUSG00000075510	Fam187a	chr11:102885169-102886731	+	non-BED genes	No	1.74393	1.91358	1.03519	1.86075	1.116	1.224	0.662	1.19	0.677234	1563
ENSMUSG00000050240	Hic2	chr16:17233572-17263430	+	non-BED genes	No	30.4461	35.4012	39.243	37.525	1.02	1.186	1.314	1.257	6.42428	29859
ENSMUSG00000079084	Ccdc82	chr9:13246982-13289409	+	non-BED genes	No	17.8753	13.8136	16.1395	21.3986	0.421	0.326	0.38	0.504	30.3252	42428
ENSMUSG00000026803	Ttf1	chr2:29060262-29087656	+	non-BED genes	No	15.6227	15.7272	14.822	16.1781	0.57	0.574	0.541	0.591	34.3757	27395
ENSMUSG00000031512	Tex29	chr8:11840474-11855761	+	non-BED genes	No	10.8269	11.2423	20.1861	18.194	0.708	0.735	1.32	1.19	4.76825	15288
ENSMUSG00000060716	Plekhh1	chr12:79029163-79081648	+	non-BED genes	No	27.0309	25.5941	33.5965	35.3025	0.515	0.488	0.64	0.673	7.472	52486
ENSMUSG00000048174	Tmem81	chr1:132506230-132508637	+	non-BED genes	No	2.17991	3.22916	1.69394	2.22256	0.905	1.341	0.703	0.923	3.34953	2408
ENSMUSG00000016382	Pls3	chrX:75785654-75875182	-	non-BED genes	No	56.6051	51.9058	51.8064	49.8783	0.632	0.58	0.579	0.557	54.3966	89529
ENSMUSG00000052949	Rnf157	chr11:116336353-116413032	-	non-BED genes	No	61.1829	66.1978	71.5219	64.6092	0.798	0.863	0.933	0.843	1.07183	76680
ENSMUSG00000099297	RP24-312B12.1	chr7:25089753-25092182	-	non-BED genes	No	1.88926	2.27237	1.45867	1.29218	0.777	0.935	0.6	0.532	0.786171	2430
ENSMUSG00000059866	Tnip2	chr5:34496087-34513997	-	non-BED genes	No	14.1694	16.385	18.4451	19.3828	0.791	0.915	1.03	1.082	21.1681	17911
ENSMUSG00000001143	Lman2l	chr1:36422065-36445271	-	non-BED genes	No	18.0933	20.7504	24.0446	23.8279	0.78	0.894	1.036	1.027	6.26342	23207
ENSMUSG00000073888	Ccl27a	chr4:41769467-41774247	-	non-BED genes	No	6.53974	4.84374	2.3527	2.22256	1.368	1.013	0.492	0.465	0.505176	4781
ENSMUSG00000031309	Rps6ka3	chrX:159210307-159368244	+	non-BED genes	Yes	79.1308	74.1511	66.0637	63.9373	0.501	0.469	0.418	0.405	0	157938
ENSMUSG00000039697	Ncoa7	chr10:30645584-30803107	-	non-BED genes	No	161.822	155.478	152.596	151.547	1.027	0.987	0.969	0.962	3.09621	157524
ENSMUSG00000030714	Ccdc101	chr7:126649309-126672925	+	non-BED genes	No	18.6746	17.9996	15.2925	14.1106	0.791	0.762	0.648	0.597	2.52726	23617
ENSMUSG00000031851	Ntpcr	chr8:125729963-125748235	+	non-BED genes	No	17.8026	20.0926	14.9161	12.56	0.974	1.1	0.816	0.687	0.439363	18273
ENSMUSG00000000759	Tubgcp3	chr8:12614277-12672248	-	non-BED genes	No	53.4079	65.3606	69.3104	65.4879	0.921	1.127	1.196	1.13	7.9473	57972
ENSMUSG00000029389	Ddx55	chr5:124552864-124569660	+	non-BED genes	No	18.8926	19.9132	14.7279	11.9915	1.125	1.186	0.877	0.714	5.96891	16797
ENSMUSG00000035722	Abca7	chr10:79996494-80015572	+	non-BED genes	No	10.3183	11.9001	9.74016	9.61385	0.541	0.624	0.511	0.504	6.45978	19079
ENSMUSG00000033671	Cep350	chr1:155844966-155972890	-	non-BED genes	No	76.079	77.3803	92.2727	91.3316	0.595	0.605	0.721	0.714	0.638096	127925
ENSMUSG00000033685	Ucp2	chr7:100493337-100502020	+	non-BED genes	No	7.77502	10.5845	7.858	7.44298	0.895	1.219	0.905	0.857	6.71954	8684
ENSMUSG00000027164	Traf6	chr2:101678429-101701669	+	non-BED genes	No	17.1486	18.3584	17.1747	17.6771	0.738	0.79	0.739	0.761	32.8169	23241
ENSMUSG00000037104	Socs5	chr17:87107679-87137583	+	non-BED genes	No	20.4912	21.2287	32.9848	31.9428	0.685	0.71	1.103	1.068	3.20975	29905
ENSMUSG00000022159	Rab2b	chr14:52261759-52279545	-	non-BED genes	No	12.1348	10.5247	7.95211	8.42504	0.682	0.592	0.447	0.474	17.3864	17787
ENSMUSG00000001964	Emd	chrX:74254687-74261548	+	non-BED genes	No	8.57432	6.45832	3.0585	3.51474	1.25	0.941	0.446	0.512	15.5416	6862
ENSMUSG00000071064	Zfp827	chr8:79028437-79193766	+	non-BED genes	Yes	175.556	193.032	209.908	206.594	1.062	1.168	1.27	1.25	0.37924	165330
ENSMUSG00000033596	Rfwd3	chr8:111270944-111300222	-	non-BED genes	No	12.9342	14.5312	17.0806	18.6075	0.442	0.496	0.583	0.636	5.989	29279
ENSMUSG00000029407	Uso1	chr5:92137938-92202794	+	non-BED genes	No	31.9721	37.3746	46.5363	46.0534	0.493	0.576	0.718	0.71	11.2731	64857
ENSMUSG00000003037	Rab8a	chr8:72161200-72183904	+	non-BED genes	No	23.7611	28.3449	21.0331	19.1243	1.047	1.248	0.926	0.842	4.85168	22705
ENSMUSG00000069089	Cdk7	chr13:100697027-100730942	-	non-BED genes	No	24.0517	25.8931	26.0208	24.5515	0.709	0.763	0.767	0.724	30.7895	33916
ENSMUSG00000022325	Pop1	chr15:34495304-34530648	+	non-BED genes	No	34.6606	34.6836	34.067	33.5968	0.981	0.981	0.964	0.951	39.9837	35345
ENSMUSG00000087373	Gm15892	chr11:88059066-88067476	+	non-BED genes	No	5.0138	7.17592	5.97585	5.53055	0.596	0.853	0.71	0.658	1.07336	8411
ENSMUSG00000000278	Scpep1	chr11:88924020-88955465	-	non-BED genes	No	24.3424	27.5077	31.8084	29.4101	0.774	0.875	1.012	0.935	39.0743	31446
ENSMUSG00000058254	Tspan7	chrX:10485158-10596605	+	non-BED genes	Yes	71.4285	74.8687	106.671	104.719	0.641	0.672	0.957	0.94	11.8527	111448
ENSMUSG00000025236	Adpgk	chr9:59291572-59316199	+	non-BED genes	No	15.2594	17.88	20.7978	22.6391	0.62	0.726	0.844	0.919	33.0974	24628
ENSMUSG00000028423	Nfx1	chr4:40970906-41025993	+	non-BED genes	No	54.2072	55.0751	56.5118	54.892	0.984	1	1.026	0.996	5.80426	55088
ENSMUSG00000028793	Rnf19b	chr4:129058271-129085886	+	non-BED genes	No	23.6157	29.6006	31.2438	33.8035	0.855	1.072	1.131	1.224	7.21406	27616
ENSMUSG00000000934	Top1mt	chr15:75657035-75678800	-	non-BED genes	No	18.4566	18.2986	14.4926	13.8522	0.848	0.841	0.666	0.636	8.57575	21766
ENSMUSG00000030279	C2cd5	chr6:143010920-143100107	-	non-BED genes	No	73.0997	78.1577	89.1201	91.59	0.82	0.876	0.999	1.027	15.055	89188
ENSMUSG00000096975	Gm16386	chr17:22784798-22817741	-	non-BED genes	No	14.6781	12.5579	16.8924	20.0547	0.446	0.381	0.513	0.609	23.965	32944
ENSMUSG00000026705	Klhl20	chr1:161088375-161131511	-	non-BED genes	No	26.5223	30.3182	32.9377	31.4259	0.615	0.703	0.764	0.729	114.252	43137
ENSMUSG00000035399	Oser1	chr2:163405822-163424697	-	non-BED genes	No	18.4566	15.9066	20.4214	22.9492	0.978	0.843	1.082	1.216	0	18876
ENSMUSG00000063757	4632433K11Rik	chr7:5034118-5035246	+	non-BED genes	No	1.08996	1.49498	0.329377	0.671936	0.965	1.324	0.292	0.595	1.02789	1129
ENSMUSG00000059495	Arhgef12	chr9:42963842-43105718	-	non-BED genes	No	122.002	133.532	160.924	155.837	0.86	0.941	1.134	1.098	2.62489	141877
ENSMUSG00000024146	Cript	chr17:87025550-87035810	+	non-BED genes	No	6.46708	6.69752	7.15219	5.7373	0.63	0.653	0.697	0.559	23.5889	10261
ENSMUSG00000061524	Zic2	chr14:122475435-122479852	+	non-BED genes	No	1.01729	0.717592	1.50573	1.39556	0.23	0.162	0.341	0.316	1.26377	4418
ENSMUSG00000035051	Dhx57	chr17:80238304-80290476	-	non-BED genes	No	59.003	59.2611	39.9488	38.9723	1.131	1.136	0.766	0.747	0.382284	52173
ENSMUSG00000037608	Bclaf1	chr10:20312469-20342501	+	non-BED genes	No	24.851	26.3715	35.7139	34.7856	0.827	0.878	1.189	1.158	4.99547	30033
ENSMUSG00000078716	Tmem8b	chr4:43668971-43692668	+	non-BED genes	No	29.1382	27.7469	32.7966	28.5831	1.23	1.171	1.384	1.206	8.64929	23698
ENSMUSG00000006740	Kif5b	chr18:6201002-6242174	-	non-BED genes	No	38.6571	33.0092	34.5376	36.0261	0.939	0.802	0.839	0.875	0	41173
ENSMUSG00000021792	Fam213a	chr14:40993740-41013788	-	non-BED genes	No	22.0171	22.7237	24.9856	23.4144	1.098	1.133	1.246	1.168	38.2277	20049
ENSMUSG00000017776	Crk	chr11:75679259-75706908	+	non-BED genes	No	26.0863	26.1323	32.3731	32.563	0.943	0.945	1.171	1.178	3.16026	27650
ENSMUSG00000039217	Il18	chr9:50575273-50581837	+	non-BED genes	No	1.08996	1.43518	1.55278	2.63606	0.166	0.219	0.237	0.402	0.739957	6565
ENSMUSG00000019992	Mtfr2	chr10:20347819-20361669	+	non-BED genes	No	5.15913	4.00655	4.42307	5.89236	0.372	0.289	0.319	0.425	35.676	13851
ENSMUSG00000074238	Ap1ar	chr3:127807264-127837492	-	non-BED genes	No	25.6503	28.0459	38.9606	34.217	0.849	0.928	1.289	1.132	2.96779	30229
ENSMUSG00000029767	Calu	chr6:29348069-29377110	+	non-BED genes	No	26.9583	27.2685	28.5147	28.8415	0.928	0.939	0.982	0.993	48.4684	29042
ENSMUSG00000046160	Olig1	chr16:91269769-91271939	+	non-BED genes	No	0.799301	0.956789	2.54091	1.86075	0.368	0.441	1.17	0.857	0.297589	2171
ENSMUSG00000001098	Kctd10	chr5:114363567-114380515	-	non-BED genes	No	14.6054	19.4348	19.198	16.9535	0.862	1.147	1.133	1	15.4731	16949
ENSMUSG00000017221	Psmd3	chr11:98682554-98695979	+	non-BED genes	No	12.3528	18.1192	14.0691	12.3533	0.92	1.35	1.048	0.92	4.231	13426
ENSMUSG00000000876	Pxmp4	chr2:154585758-154603708	-	non-BED genes	No	20.6365	22.4247	25.5503	20.1064	1.15	1.249	1.423	1.12	6.0416	17951
ENSMUSG00000033658	Ddx19b	chr8:111003188-111031751	-	non-BED genes	No	24.9237	21.5277	14.1162	16.54	0.873	0.754	0.494	0.579	0	28564
ENSMUSG00000053877	Srcap	chr7:127512027-127536376	+	non-BED genes	No	21.3631	19.4348	21.2213	24.6032	0.877	0.798	0.872	1.01	2.35747	24350
ENSMUSG00000027519	Rab22a	chr2:173659760-173707343	+	non-BED genes	No	21.7265	18.1192	34.9611	37.8351	0.457	0.381	0.735	0.795	13.991	47584
ENSMUSG00000097440	Gm6277	chr18:11820676-11839337	-	non-BED genes	No	19.2559	18.777	13.1751	13.6972	1.032	1.006	0.706	0.734	6.29197	18662
ENSMUSG00000052712	BC004004	chr17:29268788-29302881	+	non-BED genes	No	40.9097	44.1319	39.7135	42.7454	1.2	1.294	1.165	1.254	11.4762	34094
ENSMUSG00000033105	Lss	chr10:76531588-76557138	+	non-BED genes	No	21.7991	24.1589	23.8093	23.3627	0.853	0.946	0.932	0.914	13.8445	25551
ENSMUSG00000017288	Vps53	chr11:76046226-76179647	-	non-BED genes	No	94.2449	107.4	108.177	109.474	0.706	0.805	0.811	0.821	8.52565	133422
ENSMUSG00000020111	Micu1	chr10:59702477-59864132	+	non-BED genes	No	150.341	175.93	163.606	164.573	0.93	1.088	1.012	1.018	43.8167	161656
ENSMUSG00000021514	Zfp369	chr13:65278814-65304221	+	non-BED genes	No	11.4082	8.1925	7.57568	10.3892	0.449	0.322	0.298	0.409	29.1142	25408
ENSMUSG00000046836	Brox	chr1:183276342-183297256	-	non-BED genes	No	18.8199	18.2388	12.0458	11.1128	0.9	0.872	0.576	0.531	7.31426	20915
ENSMUSG00000059263	Usp47	chr7:112023506-112111386	+	non-BED genes	No	87.8505	89.2803	92.7903	92.0035	1	1.016	1.056	1.047	12.6263	87881
ENSMUSG00000062590	Armc9	chr1:86154780-86278284	+	non-BED genes	No	101.657	115.592	111.424	110.766	0.823	0.936	0.902	0.897	9.34155	123505
ENSMUSG00000024122	Pdpk1	chr17:24073680-24150924	-	non-BED genes	No	77.4596	81.2672	91.0964	92.4687	1.003	1.052	1.179	1.197	1.21479	77245
ENSMUSG00000060703	Cd302	chr2:60251993-60284488	-	non-BED genes	No	26.0136	23.5609	24.7033	26.2055	0.801	0.725	0.76	0.806	0.626996	32496
ENSMUSG00000038346	Zfp384	chr6:125009145-125037870	+	non-BED genes	No	29.3562	28.9429	29.1734	29.4101	1.022	1.008	1.016	1.024	0.299645	28726
ENSMUSG00000026632	Tatdn3	chr1:191045826-191062932	-	non-BED genes	No	14.5328	9.86688	6.54049	7.59804	0.85	0.577	0.382	0.444	129.764	17107
ENSMUSG00000027366	Sppl2a	chr2:126890391-126933235	-	non-BED genes	No	34.588	32.2318	25.4562	27.1876	0.807	0.752	0.594	0.635	6.66259	42845
ENSMUSG00000030177	Ccdc77	chr6:120324323-120364374	-	non-BED genes	No	31.3181	21.6473	13.6456	17.4186	0.782	0.54	0.341	0.435	1.96096	40052
ENSMUSG00000020427	Igfbp3	chr11:7206086-7213923	-	non-BED genes	No	10.4636	8.2523	6.54049	6.87442	1.335	1.053	0.834	0.877	10.2413	7838
ENSMUSG00000096262	Ap1g1	chr8:109863108-109864203	+	non-BED genes	No	1.45328	1.25579	1.12929	0.568561	1.326	1.146	1.03	0.519	0.614801	1096
ENSMUSG00000002984	Tomm40	chr7:19701313-19715438	-	non-BED genes	No	11.7715	13.8734	11.7635	10.751	0.833	0.982	0.833	0.761	1.21702	14126
ENSMUSG00000031982	Arv1	chr8:124722139-124734123	+	non-BED genes	No	7.4117	8.2523	7.7639	7.18454	0.618	0.689	0.648	0.599	6.03276	11985
ENSMUSG00000024054	Smchd1	chr17:71344489-71475343	-	non-BED genes	No	67.1413	69.9652	70.722	72.3623	0.513	0.535	0.54	0.553	18.1786	130855
ENSMUSG00000021738	Atxn7	chr14:14012491-14107296	+	non-BED genes	No	68.0859	82.3436	101.119	106.321	0.718	0.869	1.067	1.121	2.36919	94806
ENSMUSG00000025436	Xrcc6bp1	chr10:126868430-126901371	-	non-BED genes	No	19.0379	19.1956	15.669	16.54	0.578	0.583	0.476	0.502	5.8177	32942
ENSMUSG00000020361	Hspa4	chr11:53259814-53300457	-	non-BED genes	No	34.0793	40.9625	52.6533	51.2222	0.838	1.008	1.295	1.26	3.05442	40644
ENSMUSG00000097747	Gm26534	chr11:60879118-60887218	+	non-BED genes	No	8.28367	7.53471	5.08182	5.06536	1.023	0.93	0.627	0.625	6.88447	8101
ENSMUSG00000050890	Pdik1l	chr4:134275002-134287895	-	non-BED genes	No	11.4082	13.1558	6.39933	6.40923	0.885	1.02	0.496	0.497	1.199	12894
ENSMUSG00000061981	Flot2	chr11:78037931-78060434	+	non-BED genes	No	20.2005	21.0494	17.457	16.3332	0.898	0.935	0.776	0.726	4.85969	22504
ENSMUSG00000042772	Smg7	chr1:152836996-152902646	-	non-BED genes	No	64.6708	73.8521	73.5923	73.0859	0.985	1.125	1.121	1.113	1.79826	65651
ENSMUSG00000021646	Mccc2	chr13:99948533-100015639	-	non-BED genes	No	52.3179	51.9058	62.3935	65.9014	0.78	0.773	0.93	0.982	29.0376	67107
ENSMUSG00000044629	Cnrip1	chr11:17051586-17079371	+	non-BED genes	No	40.7644	30.6172	22.727	24.7066	1.467	1.102	0.818	0.889	0.803633	27786
ENSMUSG00000026095	Asnsd1	chr1:53325507-53352752	-	non-BED genes	No	12.3528	11.7207	12.6575	11.2678	0.453	0.43	0.465	0.414	12.4724	27246
ENSMUSG00000047910	Pcdhb16	chr18:37477768-37483035	+	non-BED genes	No	1.74393	1.37538	1.41162	2.68774	0.331	0.261	0.268	0.51	5.0991	5268
ENSMUSG00000032044	Rpusd4	chr9:35267865-35277731	+	non-BED genes	No	9.51895	11.3619	7.99917	8.06323	0.965	1.152	0.811	0.817	9.06794	9867
ENSMUSG00000031565	Fgfr1	chr8:25513654-25575714	+	non-BED genes	No	32.408	34.2052	43.666	43.0039	0.522	0.551	0.704	0.693	0	62061
ENSMUSG00000054874	Pcnxl3	chr19:5664635-5688908	-	non-BED genes	No	15.1867	20.6308	17.5982	15.1444	0.626	0.85	0.725	0.624	7.21165	24274
ENSMUSG00000024781	Lipa	chr19:34492318-34527474	-	non-BED genes	No	22.3078	20.6906	25.0797	27.2392	0.635	0.589	0.713	0.775	63.807	35157
ENSMUSG00000030771	Micalcl	chr7:112368308-112413104	+	non-BED genes	No	51.0826	52.444	54.959	53.0312	1.14	1.171	1.227	1.184	2.1738	44797
ENSMUSG00000028069	Gpatch4	chr3:88043108-88055993	+	non-BED genes	No	10.3183	8.8503	12.3752	10.5959	0.801	0.687	0.96	0.822	30.2038	12886
ENSMUSG00000025235	Bbs4	chr9:59321966-59353508	-	non-BED genes	No	28.0482	31.574	27.1972	26.4639	0.889	1.001	0.862	0.839	6.04426	31543
ENSMUSG00000089984	Fbxo24	chr5:137612503-137629002	-	non-BED genes	No	13.8788	12.4981	6.44639	6.71936	0.841	0.757	0.391	0.407	1.04266	16500
ENSMUSG00000037336	Mfsd2b	chr12:4862440-4874359	-	non-BED genes	No	9.73694	9.08949	12.5634	13.5938	0.817	0.763	1.054	1.14	9.78345	11920
ENSMUSG00000039983	Ccdc32	chr2:119017779-119029393	-	non-BED genes	No	10.1003	9.74728	13.4104	12.405	0.87	0.839	1.155	1.068	9.33319	11615
ENSMUSG00000032077	Bud13	chr9:46283008-46298783	+	non-BED genes	No	8.86498	8.5513	8.14033	9.51047	0.562	0.542	0.516	0.603	14.135	15776
ENSMUSG00000036985	Zdhhc9	chrX:48171969-48208878	-	non-BED genes	No	40.4737	37.554	39.1018	38.4554	1.097	1.017	1.059	1.042	3.80916	36910
ENSMUSG00000020623	Map2k6	chr11:110399122-110525522	+	non-BED genes	No	125.272	133.173	130.481	132.681	0.991	1.054	1.032	1.05	14.7232	126401
ENSMUSG00000004631	Sgce	chr6:4674350-4747204	-	non-BED genes	No	36.7679	28.8233	43.7131	46.1051	0.505	0.396	0.6	0.633	10.6239	72855
ENSMUSG00000020841	Cpd	chr11:76778424-76847018	-	non-BED genes	No	77.2416	79.3537	77.5449	83.6302	1.126	1.157	1.13	1.219	13.5689	68595
ENSMUSG00000026229	Psmd1	chr1:86064387-86139151	+	non-BED genes	No	72.3731	66.5566	67.2871	64.6092	0.968	0.89	0.9	0.864	8.68475	74765
ENSMUSG00000029729	Zkscan1	chr5:138085084-138107822	+	non-BED genes	No	23.9064	22.6639	24.5151	22.3289	1.051	0.997	1.078	0.982	18.8039	22739
ENSMUSG00000050697	Prkaa1	chr15:5143861-5181899	+	non-BED genes	No	22.8891	24.5775	32.2319	31.1158	0.602	0.646	0.847	0.818	10.5961	38039
ENSMUSG00000040818	Dennd6a	chr14:26579578-26633394	+	non-BED genes	No	41.7817	46.2847	42.3956	42.7971	0.776	0.86	0.788	0.795	31.1871	53817
ENSMUSG00000027551	Zfp64	chr2:168893331-168955587	-	non-BED genes	No	61.3282	65.1214	55.1942	55.4089	0.985	1.046	0.887	0.89	3.02165	62257
ENSMUSG00000041153	Osgin2	chr4:15997121-16013888	-	non-BED genes	No	14.7507	14.292	20.7508	20.1581	0.88	0.852	1.238	1.202	7.55373	16768
ENSMUSG00000070822	Zscan18	chr7:12768092-12775658	-	non-BED genes	No	3.34253	3.34876	5.78763	5.42717	0.442	0.443	0.765	0.717	0.723058	7567
ENSMUSG00000030752	Kdm8	chr7:125444676-125462265	+	non-BED genes	No	19.4012	18.3584	14.5867	14.1623	1.103	1.044	0.829	0.805	6.70993	17590
ENSMUSG00000063488	Zkscan7	chr9:122888471-122896124	+	non-BED genes	No	3.92384	3.58796	3.0585	4.80692	0.513	0.469	0.4	0.628	0.901395	7654
ENSMUSG00000042208	0610010F05Rik	chr11:23564961-23633639	-	non-BED genes	No	56.6051	49.2148	49.6889	54.5302	0.824	0.717	0.723	0.794	10.1953	68679
ENSMUSG00000022867	Usp25	chr16:77014069-77116779	+	non-BED genes	No	131.594	133.95	111.8	117.899	1.281	1.304	1.088	1.148	1.0781	102711
ENSMUSG00000035566	Pcdh17	chr14:84443563-84537060	+	non-BED genes	No	91.2657	68.53	63.7581	72.1039	0.976	0.733	0.682	0.771	122.3	93498
ENSMUSG00000014232	Cluap1	chr16:3908801-3941147	+	non-BED genes	No	26.5223	28.0459	22.8211	21.4503	0.82	0.867	0.706	0.663	22.1643	32347
ENSMUSG00000061979	Wbscr16	chr5:134148054-134176774	-	non-BED genes	No	17.5846	22.1257	21.7389	20.0547	0.612	0.77	0.757	0.698	5.80473	28721
ENSMUSG00000020694	Tlk2	chr11:105178807-105283959	+	non-BED genes	Yes	108.85	111.466	117.07	113.867	1.035	1.06	1.113	1.083	0	105153
ENSMUSG00000024477	Pggt1b	chr18:46239949-46280850	-	non-BED genes	No	23.6157	27.1489	32.2319	35.6126	0.577	0.664	0.788	0.871	15.8113	40902
ENSMUSG00000027651	Rprd1b	chr2:158028497-158132297	+	non-BED genes	No	76.5149	80.43	101.825	102.186	0.737	0.775	0.981	0.984	13.9482	103801
ENSMUSG00000026353	Ubxn4	chr1:128244181-128279377	+	non-BED genes	No	27.6849	26.1921	23.3387	24.1897	0.787	0.744	0.663	0.687	22.7994	35197
ENSMUSG00000029594	Rbm19	chr5:120116510-120197979	+	non-BED genes	No	60.6016	70.4436	82.5796	79.9603	0.744	0.865	1.014	0.981	113.84	81470
ENSMUSG00000048000	Gigyf2	chr1:87326998-87450796	+	non-BED genes	Yes	99.6947	107.041	107.518	109.164	0.805	0.865	0.868	0.882	37.3629	123799
ENSMUSG00000046603	Tcaim	chr9:122805539-122836334	+	non-BED genes	No	28.5569	27.5077	21.1272	22.484	0.927	0.893	0.686	0.73	13.6488	30796
ENSMUSG00000097662	Gm2093	chr15:3996039-4015858	+	non-BED genes	No	11.1176	7.83371	7.2463	8.06323	0.561	0.395	0.366	0.407	184.801	19820
ENSMUSG00000031365	Zfp275	chrX:73342621-73359080	+	non-BED genes	No	11.6262	11.4217	16.61	16.2298	0.706	0.694	1.009	0.986	16.9006	16460
ENSMUSG00000036896	C1qc	chr4:136889804-136893065	-	non-BED genes	No	1.16262	1.31558	1.31751	1.55062	0.356	0.403	0.404	0.475	4.41911	3262
ENSMUSG00000031226	Pbdc1	chrX:105079756-105117090	+	non-BED genes	No	11.5535	11.9599	10.446	10.2858	0.309	0.32	0.28	0.275	15.8917	37335
ENSMUSG00000058881	Zfp516	chr18:82910879-83005314	+	non-BED genes	No	64.9614	73.3139	105.213	100.48	0.688	0.776	1.114	1.064	1.23662	94436
ENSMUSG00000039128	Cdc123	chr2:5794294-5845164	-	non-BED genes	No	35.6779	37.4344	34.067	36.0261	0.701	0.736	0.67	0.708	13.5486	50871
ENSMUSG00000039840	Epg5	chr18:77938467-78035027	+	non-BED genes	No	90.6844	104.29	100.884	102.703	0.939	1.08	1.045	1.064	19.895	96561
ENSMUSG00000005716	Pvalb	chr15:78191114-78206400	-	non-BED genes	No	12.2075	14.1724	17.6923	18.0389	0.799	0.927	1.157	1.18	0	15287
ENSMUSG00000037993	Dhx38	chr8:109548017-109565601	-	non-BED genes	No	16.858	14.2322	9.22257	9.04529	0.959	0.809	0.524	0.514	9.1075	17585
ENSMUSG00000029924	Slc37a3	chr6:39334770-39377707	-	non-BED genes	No	37.3492	50.5902	50.7712	47.449	0.87	1.178	1.182	1.105	5.09819	42938
ENSMUSG00000028830	AU040320	chr4:126753544-126870070	+	non-BED genes	No	101.584	113.08	112.271	116.297	0.872	0.97	0.963	0.998	8.41213	116527
ENSMUSG00000025066	Sfr1	chr19:47731756-47735588	+	non-BED genes	No	2.76122	3.76736	4.42307	3.61812	0.72	0.983	1.154	0.944	15.5002	3833
ENSMUSG00000005299	Letm1	chr5:33739673-33782817	-	non-BED genes	No	28.6295	37.255	34.7728	32.1495	0.664	0.863	0.806	0.745	6.38095	43145
ENSMUSG00000022679	Mpv17l	chr16:13903161-13949619	+	non-BED genes	No	43.8163	38.1519	32.279	32.9765	0.943	0.821	0.695	0.71	7.35168	46459
ENSMUSG00000048489	8430408G22Rik	chr6:116650684-116652847	+	non-BED genes	No	1.67127	1.67438	1.03519	0.878685	0.772	0.774	0.478	0.406	10.7178	2164
ENSMUSG00000005621	Zfp592	chr7:80993681-81045164	+	non-BED genes	No	37.4218	46.2249	52.1357	53.1863	0.727	0.898	1.013	1.033	0.523691	51484
ENSMUSG00000032396	Dis3l	chr9:64306756-64341288	-	non-BED genes	No	36.1139	30.2584	20.8449	20.3648	1.046	0.876	0.604	0.59	5.89458	34533
ENSMUSG00000021831	Ero1l	chr14:45283092-45318572	-	non-BED genes	No	27.3216	31.3946	31.9967	28.7382	0.77	0.885	0.902	0.81	126.881	35481
ENSMUSG00000028975	Pex14	chr4:148960535-149099876	-	non-BED genes	No	67.65	77.0215	118.388	121.207	0.485	0.553	0.85	0.87	10.0709	139342
ENSMUSG00000027574	Nkain4	chr2:180934772-180954699	-	non-BED genes	No	15.8407	16.3252	18.6334	18.4524	0.795	0.819	0.935	0.926	5.91049	19928
ENSMUSG00000038252	Ncapd2	chr6:125168009-125191595	-	non-BED genes	No	26.159	29.4811	18.5863	19.0726	1.109	1.25	0.788	0.809	11.5048	23587
ENSMUSG00000058192	Zfp846	chr9:20581325-20595194	+	non-BED genes	No	9.44629	7.83371	7.29336	8.1666	0.681	0.565	0.526	0.589	8.5449	13870
ENSMUSG00000025759	Mfsd8	chr3:40818070-40846885	-	non-BED genes	No	17.512	13.993	12.7046	12.7151	0.608	0.486	0.441	0.441	3.20669	28816
ENSMUSG00000002227	Mov10	chr3:104794836-104818563	-	non-BED genes	No	15.0414	15.9664	11.6223	12.7668	0.634	0.673	0.49	0.538	4.03405	23728
ENSMUSG00000028345	Tex10	chr4:48430858-48473459	-	non-BED genes	No	25.6503	29.0027	33.7377	35.1991	0.602	0.681	0.792	0.826	8.47646	42602
ENSMUSG00000009079	Ewsr1	chr11:5069689-5099266	-	non-BED genes	No	34.588	35.162	32.5613	32.2012	1.169	1.189	1.101	1.089	3.58326	29578
ENSMUSG00000021610	Clptm1l	chr13:73604002-73620639	+	non-BED genes	No	17.8753	19.4946	20.3743	18.9693	1.074	1.172	1.225	1.14	2.21933	16638
ENSMUSG00000031756	Cenpn	chr8:116921740-116941503	+	non-BED genes	No	16.9307	14.5312	14.6808	16.1781	0.857	0.735	0.743	0.819	50.6073	19764
ENSMUSG00000095253	Zfp799	chr17:32815455-32822200	-	non-BED genes	No	3.70585	4.12615	4.42307	4.03161	0.549	0.612	0.656	0.598	1.97841	6746
ENSMUSG00000017478	Zc3h18	chr8:122376609-122417360	+	non-BED genes	No	36.6952	44.0123	46.0187	42.9522	0.9	1.08	1.129	1.054	4.32484	40752
ENSMUSG00000022321	Cdh10	chr15:18818947-19014236	+	non-BED genes	Yes	260.936	242.187	220.589	213.934	1.336	1.24	1.13	1.095	4.24054	195290
ENSMUSG00000011256	Adam19	chr11:46055992-46147343	+	non-BED genes	No	105.944	105.606	96.1311	90.6079	1.16	1.156	1.052	0.992	17.6779	91352
ENSMUSG00000028431	Ikbkap	chr4:56749680-56802331	-	non-BED genes	No	51.8819	58.1249	48.9831	46.7771	0.985	1.104	0.93	0.888	10.9734	52652
ENSMUSG00000022574	Naprt1	chr15:75890964-75894481	-	non-BED genes	No	2.03459	2.15277	4.51718	3.35968	0.578	0.612	1.284	0.955	6.75888	3518
ENSMUSG00000038141	Tmem181a	chr17:6270475-6305783	+	non-BED genes	No	3.19721	3.34876	5.03477	5.11705	0.091	0.095	0.143	0.145	53.2027	35309
ENSMUSG00000048661	Lemd3	chr10:120923413-120979332	-	non-BED genes	No	40.9097	44.0721	68.8399	70.6566	0.732	0.788	1.231	1.264	19.4869	55920
ENSMUSG00000032839	Trpc1	chr9:95706627-95750358	-	non-BED genes	No	48.8301	53.8792	56.2765	54.4785	1.117	1.232	1.287	1.246	4.13961	43732
ENSMUSG00000021326	Trim27	chr13:21179445-21194724	+	non-BED genes	No	12.4255	12.5579	10.6812	9.51047	0.813	0.822	0.699	0.622	0.0909168	15280
ENSMUSG00000020715	Ern1	chr11:106394650-106487852	-	non-BED genes	No	73.7537	71.52	80.7445	81.4076	0.791	0.767	0.866	0.873	25.3351	93203
ENSMUSG00000030726	Pold3	chr7:100082111-100121565	-	non-BED genes	No	27.9756	29.9594	28.1382	28.3764	0.709	0.759	0.713	0.719	7.06644	39455
ENSMUSG00000031575	Ash2l	chr8:25816191-25847694	-	non-BED genes	No	28.9928	26.1921	25.3621	25.1717	0.92	0.831	0.805	0.799	0	31504
ENSMUSG00000097557	C130060C02Rik	chr19:15985090-16010912	+	non-BED genes	No	34.152	27.3881	29.4087	26.2572	1.323	1.061	1.139	1.017	346.74	25823
ENSMUSG00000030759	Far1	chr7:113513834-113571511	+	non-BED genes	No	40.1831	40.5439	46.7716	49.6199	0.697	0.703	0.811	0.86	3.31342	57678
ENSMUSG00000060601	Nr1h2	chr7:44549616-44553951	-	non-BED genes	No	3.63319	6.15933	4.28191	3.87655	0.838	1.421	0.988	0.894	4.73048	4336
ENSMUSG00000010044	Zmynd10	chr9:107547310-107551319	+	non-BED genes	No	4.50515	3.94675	4.14074	4.0833	1.123	0.984	1.033	1.018	11.4763	4010
ENSMUSG00000021666	Gfm2	chr13:97137937-97181195	+	non-BED genes	No	42.0723	46.5836	31.9026	33.8552	0.973	1.077	0.737	0.783	53.8022	43259
ENSMUSG00000004937	Sgta	chr10:81044075-81060178	-	non-BED genes	No	14.7507	18.9564	19.7626	17.9355	0.916	1.177	1.227	1.114	15.5554	16104
ENSMUSG00000052229	Gpr17	chr18:31942997-31949636	-	non-BED genes	No	1.45328	1.85378	2.16448	4.03161	0.219	0.279	0.326	0.607	1.241	6640
ENSMUSG00000016552	Foxred2	chr15:77940522-77956722	-	non-BED genes	No	17.294	20.9896	20.6567	20.4682	1.067	1.296	1.275	1.263	5.26663	16201
ENSMUSG00000067942	Zfp160	chr17:21008941-21028852	+	non-BED genes	No	17.1486	14.8302	17.5041	18.7108	0.861	0.745	0.879	0.94	17.3935	19912
ENSMUSG00000026664	Phyh	chr2:4919019-4938730	+	non-BED genes	No	13.2248	12.6774	9.55194	10.8027	0.671	0.643	0.485	0.548	11.775	19712
ENSMUSG00000055951	Ccl25	chr8:4325227-4348790	+	non-BED genes	No	17.2213	15.0694	17.1747	15.868	0.731	0.64	0.729	0.673	19.8239	23564
ENSMUSG00000000743	Chmp1a	chr8:123204264-123212763	-	non-BED genes	No	9.51895	10.5845	7.19925	7.59804	1.12	1.245	0.847	0.894	3.02499	8500
ENSMUSG00000024472	Dcp2	chr18:44380500-44424969	+	non-BED genes	No	27.8302	31.0956	31.432	32.3563	0.626	0.699	0.707	0.728	2.88396	44470
ENSMUSG00000044167	Foxo1	chr3:52268337-52350109	+	non-BED genes	No	53.1172	48.0786	75.051	78.4097	0.65	0.588	0.918	0.959	2.54801	81773
ENSMUSG00000031327	Chic1	chrX:103356476-103396092	+	non-BED genes	No	24.197	25.0559	25.4091	25.9471	0.611	0.632	0.641	0.655	9.33361	39617
ENSMUSG00000073805	Fam196a	chr7:134881926-134938430	-	non-BED genes	No	43.2349	44.7299	58.0645	59.7506	0.765	0.792	1.028	1.057	3.37309	56505
ENSMUSG00000027346	Gpcpd1	chr2:132529082-132587729	-	non-BED genes	No	53.1172	58.2445	49.9713	49.2581	0.906	0.993	0.852	0.84	0	58648
ENSMUSG00000056569	Mpz	chr1:171150711-171161130	+	non-BED genes	No	11.8442	12.3187	11.9987	12.56	1.137	1.182	1.152	1.205	138.368	10420
ENSMUSG00000079557	2017-03-02	chr17:33685692-33718670	-	non-BED genes	No	21.7265	22.8433	21.8801	20.2614	0.659	0.693	0.663	0.614	11.2553	32979
ENSMUSG00000029279	Brdt	chr5:107331159-107387058	+	non-BED genes	No	44.8335	47.1218	47.6186	46.9838	0.802	0.843	0.852	0.84	0	55900
ENSMUSG00000039781	Azi1	chr11:120064430-120086827	-	non-BED genes	No	21.6538	29.1821	22.727	22.3806	0.967	1.303	1.015	0.999	7.27443	22398
ENSMUSG00000079018	Ly6c1	chr15:75045017-75048837	-	non-BED genes	No	0.653974	0.298996	0.988132	0.516874	0.171	0.078	0.259	0.135	0.375894	3821
ENSMUSG00000042233	2010015L04Rik	chr4:155409190-155447944	+	non-BED genes	No	28.4842	31.2152	28.9382	30.5472	0.735	0.805	0.747	0.788	17.2744	38755
ENSMUSG00000000276	Dgke	chr11:89035179-89066850	-	non-BED genes	No	33.5707	34.0258	34.2552	36.3879	1.06	1.074	1.082	1.149	0	31672
ENSMUSG00000030556	Lrrc28	chr7:67513411-67645236	-	non-BED genes	No	103.909	100.642	132.88	139.401	0.788	0.763	1.008	1.057	16.8792	131826
ENSMUSG00000059013	Sh2d3c	chr2:32721055-32755512	+	non-BED genes	No	40.3284	43.4741	27.1972	23.4144	1.17	1.262	0.789	0.68	0.5592	34458
ENSMUSG00000093470	Gm20645	chr11:23736847-23740357	-	non-BED genes	No	1.74393	2.15277	1.12929	1.86075	0.497	0.613	0.322	0.53	0.309615	3511
ENSMUSG00000010721	Lmbr1	chr5:29229814-29378390	-	non-BED genes	No	57.913	48.7364	69.4516	78.2547	0.39	0.328	0.467	0.527	48.0113	148577
ENSMUSG00000060073	Psma3	chr12:70974621-70996347	+	non-BED genes	No	18.8199	21.8865	19.198	19.6929	0.866	1.007	0.884	0.906	8.16993	21727
ENSMUSG00000029072	Tas1r3	chr4:155859268-155863362	-	non-BED genes	No	3.70585	3.16936	3.76431	3.2563	0.905	0.774	0.919	0.795	1.18546	4095
ENSMUSG00000037447	Arid5a	chr1:36307733-36324029	+	non-BED genes	No	10.1729	10.2257	9.41078	11.3195	0.624	0.627	0.577	0.695	40.4499	16297
ENSMUSG00000030613	Ccdc90b	chr7:92561149-92582294	+	non-BED genes	No	21.9445	18.8368	14.6338	13.8005	1.038	0.891	0.692	0.653	17.6508	21146
ENSMUSG00000002068	Ccne1	chr7:38097984-38107534	-	non-BED genes	No	6.75773	8.96989	9.31668	8.73516	0.708	0.939	0.975	0.915	4.232	9551
ENSMUSG00000025140	Pycr1	chr11:120635712-120643769	-	non-BED genes	No	6.53974	7.89351	8.51676	7.59804	0.812	0.98	1.057	0.943	162.231	8058
ENSMUSG00000026377	Mki67ip	chr1:118321839-118333822	+	non-BED genes	No	9.66428	11.8403	9.74016	10.079	0.806	0.988	0.813	0.841	11.7675	11984
ENSMUSG00000045624	Esf1	chr2:140119883-140170564	-	non-BED genes	No	24.415	23.7403	23.6681	29.1	0.482	0.468	0.467	0.574	28.4979	50682
ENSMUSG00000058743	Kcnj14	chr7:45816461-45824756	-	non-BED genes	No	2.25258	4.90354	3.19967	3.61812	0.272	0.591	0.386	0.436	1.35014	8296
ENSMUSG00000033272	Slc35a4	chr18:36679579-36683858	+	non-BED genes	No	6.46708	3.94675	3.95253	3.41137	1.511	0.922	0.923	0.797	15.9429	4280
ENSMUSG00000037112	Sik2	chr9:50892801-51009073	-	non-BED genes	No	114.736	111.645	129.492	127.564	0.987	0.96	1.114	1.097	2.15663	116273
ENSMUSG00000057375	Yipf1	chr4:107314363-107359823	+	non-BED genes	No	33.1347	34.6238	31.0556	30.1337	0.729	0.762	0.683	0.663	61.8263	45461
ENSMUSG00000020773	Trim47	chr11:116105752-116127210	-	non-BED genes	No	8.429	8.8503	12.3752	13.1286	0.393	0.412	0.577	0.612	0.983043	21459
ENSMUSG00000026888	Grb14	chr2:64912476-65024987	-	non-BED genes	No	85.5979	83.4798	89.5436	92.6754	0.761	0.742	0.796	0.824	0	112512
ENSMUSG00000022022	Mtrf1	chr14:79397772-79423650	+	non-BED genes	No	21.2905	16.2654	12.7516	13.6972	0.823	0.629	0.493	0.529	37.3369	25879
ENSMUSG00000059119	Nap1l4	chr7:143513579-143549090	-	non-BED genes	No	22.0171	21.2885	27.2442	28.5314	0.62	0.599	0.767	0.803	3.48437	35512
ENSMUSG00000029772	Ahcyl2	chr6:29768011-29912310	+	non-BED genes	No	139.296	143.279	148.596	154.39	0.965	0.993	1.03	1.07	1.75968	144300
ENSMUSG00000097254	C430042M11Rik	chr17:83851675-83854393	-	non-BED genes	No	2.6159	3.22916	2.07037	1.80906	0.962	1.188	0.761	0.665	5.82983	2719
ENSMUSG00000044043	Pcdhb14	chr18:37447657-37451094	+	non-BED genes	No	1.30795	0.597993	0.941078	1.13712	0.38	0.174	0.274	0.331	2.84774	3438
ENSMUSG00000038010	Ccdc138	chr10:58497970-58576242	+	non-BED genes	No	35.6779	33.4278	34.4905	39.179	0.456	0.427	0.441	0.501	97.3779	78273
ENSMUSG00000047446	Arl4a	chr12:40005447-40038025	-	non-BED genes	No	29.4288	25.7137	26.8207	27.7561	0.903	0.789	0.823	0.852	1.52739	32579
ENSMUSG00000007908	Hmgcll1	chr9:76014855-76136350	+	non-BED genes	No	92.7916	89.5195	99.8014	103.892	0.764	0.737	0.821	0.855	3.94615	121496
ENSMUSG00000027342	Pcna	chr2:132249162-132253314	-	non-BED genes	No	1.88926	1.97338	2.58797	2.94618	0.455	0.475	0.623	0.709	60.0235	4153
ENSMUSG00000098794	RP23-395P6.9	chr2:30281043-30301078	+	non-BED genes	No	21.2178	20.571	18.3981	18.194	1.059	1.027	0.918	0.908	0.568735	20036
ENSMUSG00000024222	Fkbp5	chr17:28399095-28517524	-	non-BED genes	No	71.6465	72.0581	76.4626	83.4234	0.605	0.608	0.646	0.704	2.62811	118430
ENSMUSG00000026080	Chst10	chr1:38863877-38898160	-	non-BED genes	No	32.0447	33.0092	32.1378	32.2529	0.935	0.963	0.937	0.941	4.62438	34284
ENSMUSG00000024143	Rhoq	chr17:86963082-87000069	+	non-BED genes	No	27.9756	29.78	43.9954	47.5524	0.756	0.805	1.189	1.286	1.87709	36988
ENSMUSG00000072623	Zfp9	chr6:118461950-118479320	-	non-BED genes	No	22.1624	22.1855	18.6804	19.8479	1.276	1.277	1.075	1.143	28.0441	17371
ENSMUSG00000020952	Scfd1	chr12:51377580-51450096	+	non-BED genes	No	52.1726	56.3309	46.1128	41.9185	0.719	0.777	0.636	0.578	43.8728	72517
ENSMUSG00000042557	Sin3a	chr9:57072040-57128366	+	non-BED genes	No	62.4908	64.4038	46.3011	49.5682	1.109	1.143	0.822	0.88	14.6377	56327
ENSMUSG00000028538	St3gal3	chr4:117932154-118134914	-	non-BED genes	No	132.684	152.309	227.694	217.914	0.654	0.751	1.123	1.075	9.60169	202761
ENSMUSG00000025616	Usp16	chr16:87454703-87483517	+	non-BED genes	No	24.2697	28.1655	24.1857	24.8099	0.842	0.977	0.839	0.861	0.0725434	28815
ENSMUSG00000024104	Fam21	chr6:116208033-116262668	+	non-BED genes	No	41.273	43.0555	34.5846	36.8014	0.755	0.788	0.633	0.674	34.8638	54636
ENSMUSG00000027327	1700037H04Rik	chr2:131146324-131160081	-	non-BED genes	No	14.4601	16.0262	15.9042	14.3174	1.051	1.165	1.156	1.041	3.93176	13758
ENSMUSG00000017390	Aldoc	chr11:78322968-78327781	+	non-BED genes	No	4.06917	5.26234	4.37601	3.87655	0.845	1.093	0.909	0.805	8.33294	4814
ENSMUSG00000028692	Akr1a1	chr4:116636510-116651680	-	non-BED genes	No	18.0933	17.7006	14.822	17.1085	1.193	1.167	0.977	1.128	5.19085	15171
ENSMUSG00000039308	Ndst2	chr14:20723739-20730327	-	non-BED genes	No	7.6297	8.0729	6.39933	5.58224	1.158	1.225	0.971	0.847	0.960024	6589
ENSMUSG00000054469	Lclat1	chr17:73107985-73243368	+	non-BED genes	No	101.729	100.702	134.715	132.32	0.751	0.744	0.995	0.977	7.32569	135384
ENSMUSG00000098148	Gm20204	chr8:117210778-117215997	+	non-BED genes	No	2.97921	4.54475	3.52904	4.70355	0.571	0.871	0.676	0.901	1.29371	5220
ENSMUSG00000020656	Grhl1	chr12:24572287-24617391	+	non-BED genes	No	45.8508	58.7827	57.641	55.3055	1.017	1.303	1.278	1.226	1.1885	45105
ENSMUSG00000025262	Fam120c	chrX:151344175-151471842	+	non-BED genes	No	37.7852	38.1519	43.2425	45.795	0.296	0.299	0.339	0.359	34.1142	127668
[truncated: 2,907 more rows]
