# Supplementary material for: Long genes linked to autism spectrum disorders harbor broad enhancer-like chromatin domains
Source: HighWire-hosted journal article supplement (doi:10.1101/gr.233775.117), 2018-05-30
Supplement: Supplemental_Table_S3.xlsx [file Supplemental_Table_S3.xlsx]

## Sheet: Supplemental_Table_S3
Supplemental Table S3. The accession numbers of publicly available data sets used in this study.
Reference	Description	Accession numbers
Mo. et al	The ChIP-seq data were performed from the cortical excitatory neurons of male mice at 8 to 11 weeks of age	GSM1541970, GSM1541971, GSM1541974, GSM1541975, GSM1541972, and GSM1541973
Xie. et al	The ChIP-seq data were performed from the frontal cortex of male mice at 8 to 9 weeks of age	GSM751461 and GSM751462
Nord. et al	The ChIP-seq data were performed from the forebrain of P56 mice	GSM1264366 and GSM1264368
Halder. et al	The ChIP-seq data were performed from the Anterior Cingulate cortex of male mice at 3 months of age	GSM1939119, GSM1939120, GSM1939151, and GSM1939151
Shen et al.	The Hi-C data were performed from the cortex of male mice at 8 weeks of age	GSM938750 and GSM938751
Iwase et al.	The RNA-seq and ChIP-seq data were performed from the Adult Pre-Frontal Cortex and the cortical neurons of male mice	GSM1924699-GSM1924704, GSM1495623-GSM1495624, and GSM1495629-GSM1495630
ENCODE	The ENCODE H3K27ac ChIP-seq data were performed from mouse forebrain and cortex	GSE86756, GSE82564, GSE83054, GSE82590, GSE82598, GSE82884, GSE82690, GSE82428, GSE49847
Stroud et al	The H3K27ac ChIP-seq data were performed from the 2-week-old mouse cortex	GSM2803595 and GSM2803596
Wijayatunge et al.	The RNA-seq data were performed from mouse cortical neurons	GSM1410157 and GSM1410159
King et al.	The RNA-seq data were performed from mouse cortical neurons	GSM1064933-GSM1064942
Durak et al.	The RNA-seq data were performed from mouse cortical cells	GSM2224816-GSM2224821
Vermunt et al.	The ChIP-seq data were performed from human prefrontal cortex	GSM1660049 and GSM1660051
Liu et al.	The ChIP-seq data were performed from human dorsolateral prefrontal cortex	GSM1866052
Kwon et al.	The ChIP-seq, mRNA-seq, and GRO-seq data of Neuro 2a cells	GSE91043
Johnson et al.	The RNA-seq data of excitatory neurons from 6 week old WT mice and the GRO-seq data of WT and R106W mutant mice	GSE83474
